# Supplementary material for: The CopenHeartSF trial—comprehensive sexual rehabilitation programme for male patients with implantable cardioverter defibrillator or ischaemic heart disease and impaired sexual function: protocol of a randomised clinical trial
Source: PubMed Central journal article supplement — BMJ Open. 2013 Nov 25;3(11):e003967. doi: 10.1136/bmjopen-2013-003967 (PMC3845056; doi:10.1136/bmjopen-2013-003967), 2013-11-25
Supplement: bmjopen-2013-003967.draft_revisions.pdf [file bmjopen-2013-003967.draft_revisions.pdf]

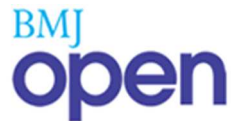

**The CopenHeartSF trial; Comprehensive sexual rehabilitation programme for male patients with implantable cardioverter defibrillator or ischaemic heart disease and impaired sexual function: protocol of a randomised clinical trial.**

|                                 |                                                                                                                                                                                                                                                                                                                                                                                                                                                                                                                                                                                                                                                                                                                                                                                                                                                                                                                                                                                                                                                                                                                                                                                                                                |
|---------------------------------|--------------------------------------------------------------------------------------------------------------------------------------------------------------------------------------------------------------------------------------------------------------------------------------------------------------------------------------------------------------------------------------------------------------------------------------------------------------------------------------------------------------------------------------------------------------------------------------------------------------------------------------------------------------------------------------------------------------------------------------------------------------------------------------------------------------------------------------------------------------------------------------------------------------------------------------------------------------------------------------------------------------------------------------------------------------------------------------------------------------------------------------------------------------------------------------------------------------------------------|
| Journal:                        | <i>BMJ Open</i>                                                                                                                                                                                                                                                                                                                                                                                                                                                                                                                                                                                                                                                                                                                                                                                                                                                                                                                                                                                                                                                                                                                                                                                                                |
| Manuscript ID:                  | bmjopen-2013-003967                                                                                                                                                                                                                                                                                                                                                                                                                                                                                                                                                                                                                                                                                                                                                                                                                                                                                                                                                                                                                                                                                                                                                                                                            |
| Article Type:                   | Protocol                                                                                                                                                                                                                                                                                                                                                                                                                                                                                                                                                                                                                                                                                                                                                                                                                                                                                                                                                                                                                                                                                                                                                                                                                       |
| Date Submitted by the Author:   | 06-Sep-2013                                                                                                                                                                                                                                                                                                                                                                                                                                                                                                                                                                                                                                                                                                                                                                                                                                                                                                                                                                                                                                                                                                                                                                                                                    |
| Complete List of Authors:       | Johansen, Pernille; Copenhagen University Hospital Bispebjerg, Department of Cardiology; Copenhagen University Hospital, Rigshospitalet, The Heart Centre<br>Zwisler, Ann-Dorthe; Copenhagen University Hospital, Rigshospitalet, The Heart Centre<br>Svendsen, Jesper; Copenhagen University Hospital Rigshospitalet, The Heart Centre<br>Frederiksen, Marianne; Copenhagen University Hospital Bispebjerg, Department of Cardiology<br>Lindschou, Jane; Copenhagen University Hospital Rigshospitalet, The Copenhagen Trial Unit, Centre for Clinical Intervention Research<br>Winkel, Per; Copenhagen University Hospital Rigshospitalet, The Copenhagen Trial Unit, Centre for Clinical Intervention Research<br>Gluud, Christian; Copenhagen University Hospital Rigshospitalet, The Copenhagen Trial Unit, Centre for Clinical Intervention Research<br>Giraldi, Annamaria; Copenhagen University Hospital Rigshospitalet, Sexological Clinic, Psychiatric Center Copenhagen<br>Steinke, Elaine; Wichita State University,<br>Jaarsma, Tiny; Linköping University, Department of Social and Welfare Studies<br>Berg, Selina; Copenhagen University Hospital Rigshospitalet, The Heart Centre; Rigshospitalet, Cardiology |
| <b>Primary Subject Heading</b>: | Rehabilitation medicine                                                                                                                                                                                                                                                                                                                                                                                                                                                                                                                                                                                                                                                                                                                                                                                                                                                                                                                                                                                                                                                                                                                                                                                                        |
| Secondary Subject Heading:      | Sexual health, Nursing, Cardiovascular medicine                                                                                                                                                                                                                                                                                                                                                                                                                                                                                                                                                                                                                                                                                                                                                                                                                                                                                                                                                                                                                                                                                                                                                                                |
| Keywords:                       | CARDIOLOGY, REHABILITATION MEDICINE, SEXUAL MEDICINE                                                                                                                                                                                                                                                                                                                                                                                                                                                                                                                                                                                                                                                                                                                                                                                                                                                                                                                                                                                                                                                                                                                                                                           |
|                                 |                                                                                                                                                                                                                                                                                                                                                                                                                                                                                                                                                                                                                                                                                                                                                                                                                                                                                                                                                                                                                                                                                                                                                                                                                                |

**The CopenHeartSF trial; Comprehensive sexual rehabilitation programme for male patients with implantable cardioverter defibrillator or ischaemic heart disease and impaired sexual function: protocol of a randomised clinical trial.**

**Pernille Palm Johansen<sup>1+2</sup>**

**Ann-Dorthe Zwisler<sup>2+3</sup>**

**Jesper Hastrup-Svendsen<sup>2+8</sup>**

**Marianne Fredriksen<sup>1</sup>**

**Jane Lindschou<sup>4</sup>**

**Per Winkel<sup>4</sup>**

**Christian Gluud<sup>4</sup>**

**Annamaria Giraldi<sup>5</sup>**

**Elaine Steinke<sup>6</sup>**

**Tiny Jaarsma<sup>7</sup>**

**Selina Kikkenborg Berg<sup>2</sup>**

<sup>1</sup>Department of Cardiology, Copenhagen University Hospital, Bispebjerg Hospital, Copenhagen, Denmark

<sup>2</sup>The Heart Centre, Copenhagen University Hospital, Rigshospitalet, Copenhagen, Denmark

<sup>3</sup>National Institute of Public Health, University of Southern Denmark

<sup>4</sup>The Copenhagen Trial Unit, Centre for Clinical Intervention Research, Rigshospitalet, Copenhagen University Hospital, Copenhagen, Denmark

<sup>5</sup>Sexological Clinic, Psychiatric Center Copenhagen, Copenhagen University Hospital, Rigshospitalet, Copenhagen, Denmark

<sup>6</sup>Wichita State University, Wichita, Kansas, United States

<sup>7</sup>Department of Social and Welfare Studies, Linköping University, Linköping, Sweden

<sup>8</sup>Institute of Clinical Medicine, Faculty of Health Science, University of Copenhagen

**Corresponding author:**

Pernille Palm Johansen RN. MCN

Copenhagen University Hospital, Bispebjerg Hospital / Rigshospitalet

Copenhagen

Denmark

Mail: [pernille.palm.johansen@regionh.dk](mailto:pernille.palm.johansen@regionh.dk)

For peer review only

**ABSTRACT**

**Introduction:** Sexuality is an important part of people's physical and mental health. Patients with heart disease often suffer from sexual dysfunction. Sexual dysfunction has a negative impact on quality of life and well-being in persons with heart disease, and sexual dysfunction is associated with anxiety and depression. Treatment and care possibilities seem to be lacking. Studies indicate that non-pharmacological interventions such as exercise training and psycho-education possess the potential of reducing sexual dysfunction in patients with heart disease. The CopenHeart<sub>SF</sub> trial will investigate the effect of a comprehensive sexual rehabilitation programme versus usual care.

**Methods and analysis:** CopenHeart<sub>SF</sub> is an investigator-initiated randomised clinical superiority trial with blinded outcome assessment, with 1:1 central randomisation to sexual rehabilitation plus usual care versus usual care alone. Based on sample size calculations, 154 male patients with impaired sexual function due to implantable cardioverter defibrillator or ischaemic heart disease will be included from two university hospitals in Denmark. All patients receive usual care and patients allocated to the experimental intervention group follow a 12 week sexual rehabilitation programme consisting of an individualised exercise program and psycho-educative consultation with a special trained nurse. The primary outcome is sexual function measured by the International Index of Erectile Function. The secondary outcome measure is psycho-social adjustment to illness by the Psychosocial Adjustment to Illness Scale, sexual domain. A number of explorative analyses will also be conducted.

**Ethics and dissemination:** CopenHeart<sub>SF</sub> is approved by the regional ethics committee (no H-4-2012-168) and the Danish Data Protection Agency (no 2007-58-0015) and is performed in accordance with good clinical practice and the Declaration of Helsinki in its latest form.

**Registration:** Clinicaltrials.gov identifier: NCT01796353

## ARTICLE SUMMARY

### Article focus

- The CopenHeart<sub>SF</sub> is a randomised clinical trial investigating the effects of a comprehensive sexual rehabilitation programme versus usual care for patients with sexual dysfunction and implantable cardioverter defibrillator or ischaemic heart disease.
- The hypothesis is, that comprehensive sexual rehabilitation consisting of a psycho-educational component and a physical exercise component including pelvic floor exercise improves sexual function.

### Key messages

- Sexual dysfunction is highly prevalent in cardiovascular patients and a systematic approach seems to be lacking.
- This trial is the first to study the effect of a comprehensive sexual rehabilitation programme in a cardiac population.
- This trial is the first to include pelvic floor exercise in a comprehensive rehabilitation programme in cardiac patients.

### Strengths and limitation of this study

- The study have been designed to meet the criteria for high quality in non-pharmacological randomised clinical with central randomisation, multicentre participation, and blinded assessment and analysis.
- We are aware of the subjective nature of the self-reported primary outcome (International Index of Erectile Function). Accordingly, we will interpret data conservatively.

## BACKGROUND

Sexuality is an important part of people's physical and mental health.<sup>1,2</sup> Patients with cardiovascular disease have increased prevalence of sexual dysfunction.<sup>3-5</sup> The causes of sexual dysfunction can be related to physical changes due to the disease, mental changes, or adverse reactions to drugs and other interventions.<sup>6,7</sup> Male sexual dysfunction is divided into sexual interest/desire disorders, ejaculation and orgasmic dysfunctions and erectile dysfunction.<sup>8</sup> The most common disorder is erectile dysfunction, defined as the persistent inability to obtain or maintain an erection which enables satisfying sexual activity.<sup>9</sup> Erectile dysfunction is associated with age, but can also be triggered by both organic and psychogenic conditions and is often related to vascular disease such as diabetes, hypertension, and heart disease.<sup>10</sup> Studies including 33,451 males estimate that erectile dysfunction in varying degrees exists in 52% of all men, and that age is the most common variable associated with erectile dysfunction.<sup>3-5</sup> The probability of complete erectile dysfunction in cardiovascular patients is 39% compared to 10% in the total population when adjusting for age.<sup>3,4</sup> Physical activity is positively associated with a lower incidence of erectile dysfunction.<sup>5</sup> The prevalence of sexual dysfunction in patients with heart disease ranges from 15% up to 89%.<sup>1,11-17</sup> Patients with ischaemic heart disease and patients with implantable cardioverter defibrillator, which are two large and growing patient populations, are especially affected.<sup>11,16,18-20</sup> Sexual dysfunction has a negative impact on quality of life and well-being in men with cardiovascular disease, and sexual dysfunction is associated with an increase in anxiety and depression.<sup>21-24</sup> The relationship is perceived to be bi-directional, with one element forcing the other.<sup>25,26</sup>

### Standard treatment

Despite the fact that several international guidelines recommend that health professionals address the topic sexuality in patients with heart disease,<sup>27,28</sup> this is rarely done in practice.<sup>29,30</sup> The consensus or practice on how or where patients with heart disease and sexual dysfunction should be treated is lacking, however, some guidelines about prescription of phosphodiesterase5 (PDE5) inhibitors exist.<sup>6</sup> The PDE5 inhibitors have an overall success rate of 50% to 80% of those treated in patients with cardiovascular disease.<sup>6,31,32</sup> PDE5 inhibitors are generally safe. Linking PDE5 inhibitors to cardiac events, large randomised trials and a meta-analysis suggest that they are not associated with an increase in myocardial infarction or cardiac events.<sup>6,32</sup> In patients with heart disease and no effect of PDE5 inhibitors, or where PDE5 inhibitors are contra-indicated because of

1  
2  
3  
4 treatment with nitrates, there seems to be no consensus on what treatment should be offered for  
5 sexual dysfunction.  
6  
7

### 8 9 **Non-pharmacological treatment potentials**

10 Non-pharmacological interventions possess potential in reducing sexual dysfunction. Lifestyle  
11 factors such as; cigarette smoking, hyperlipidaemia, and a sedentary lifestyle all predict erectile  
12 dysfunction<sup>4, 5</sup> and these are the same risk factors that predict coronary artery disease. A recent  
13 meta-analysis of six randomised trials with 740 patients with no known heart disease, showed that  
14 life style modifications such as physical exercise and pharmacotherapy for cardiovascular risk  
15 factors were associated with a significant improvement in erectile function.<sup>33</sup> Furthermore, a  
16 randomised trial investigating the effect of exercise training 3 hours per week or more in non-heart  
17 disease patients showed a significant result in improving the person's erectile functioning compared  
18 with controls with no exercise training.<sup>34</sup> We hypothesize that these lifestyle modifications can also  
19 improve sexual dysfunction in patients with already established heart disease. A systematic  
20 literature search showed five randomised clinical trials which examine the effect of physical  
21 exercise on sexual dysfunction.<sup>35-39</sup> Overall, 591 patients with heart disease were included and the  
22 effect was significant in three of the five trials.<sup>37-39</sup> However, the trials are characterised as being of  
23 small sample sizes, using non-validated tools and mainly focusing on the time before patients return  
24 to sexual activity and not on the ability and quality of the sexual performance. Randomised trials  
25 that address the psychological aspects of sexual dysfunction are limited in patients with heart  
26 disease. However, one randomised trial testing the effect of sexual therapy showed some promising  
27 trends when it comes to improving the frequency and quality of sexual activity in male patients post  
28 cardiac event beyond the usual cardiac rehabilitation.<sup>40</sup> However, due to the limited power of the  
29 sample in this trial, it did not allow the detection of significant effects. The role of pelvic floor  
30 exercises as a treatment of erectile dysfunction is not tested on patients with heart disease, but in the  
31 general population 40% to 47% had regained normal erectile function after 3-4 month of training  
32 the pelvic floor muscles.<sup>41, 42</sup> As the condition sexual dysfunction often includes both physical and  
33 psychological components, it is plausible to believe that patients with heart disease and sexual  
34 dysfunction benefit from a comprehensive rehabilitation intervention<sup>43, 44</sup> consisting of a psycho-  
35 educational component and an exercise training component including pelvic floor exercises.  
36  
37  
38  
39  
40  
41  
42  
43  
44  
45  
46  
47  
48  
49  
50  
51  
52  
53  
54  
55  
56  
57  
58  
59  
60

## TRIAL OBJECTIVES

The objective of the CopenHeart<sub>SF</sub> is to investigate benefit and harm on the sexual function of male patients with ischaemic heart disease or patients with implantable cardioverter defibrillator of a comprehensive sexual rehabilitation programme, consisting of a psycho-educative component and a physical exercise component, including pelvic floor exercises. The primary hypothesis is that, a comprehensive sexual rehabilitation programme improves sexual function, as assessed by the International Index of Erectile dysfunction (IIEF) questionnaire<sup>45, 46</sup>, in males with sexual dysfunction and ischaemic heart disease or patients with implantable cardioverter by 3.5 points in the experimental group compared with the control group after completion of the programme. The estimated increase in primary outcome is based on a study that examines the effect of a physical intervention in patients with cardiovascular disease taking PDE5-inhibitors.<sup>34</sup> The secondary hypothesis is that sexual function, measured by the sexual domain in the Psychosocial Adjustment to Illness Scale (self-reported version) (PAIS-SR) questionnaire<sup>47</sup>, improves by two points in the experimental group compared with the control group after completing the programme. The estimated increase in secondary outcome is based on two studies that examine the prevalence of sexual dysfunction in patients with heart failure.<sup>48, 49</sup>

Exploratory analyses will test the hypotheses that comprehensive sexual rehabilitation will improve: health-related quality of life, anxiety and depression, frequency of sexual activity, physical capacity measured by peak oxygen uptake (peak VO<sub>2</sub>), pelvic floor muscle strength and endurance and female assessment of male partner's erectile dysfunction.

## METHODS

CopenHeart<sub>SF</sub> is an investigator-initiated randomised clinical superiority trial with blinded outcome assessment, with 1:1 central randomisation to a comprehensive sexual rehabilitation programme plus usual care or usual care alone. Based on sample-size calculations 154 patients will be recruited from two university hospitals in Denmark. The CopenHeart<sub>SF</sub> trial is a part of the overall CopenHeart project, consisting of several randomised clinical trials ([www.CopenHeart.org](http://www.CopenHeart.org)), designed to develop evidence-based knowledge of rehabilitation among patients with complex cardiac conditions. Major parts of the CopenHeart<sub>SF</sub> methods section and trial design in this paper are similar to other randomised clinical trials, CopenHeart<sub>IE</sub><sup>50</sup>, CopenHeart<sub>RFA</sub><sup>51</sup> and CopenHeart<sub>VR</sub><sup>52</sup>.

### Study population and eligibility criteria



1  
2  
3  
4 Male patients above 18 years with sexual dysfunction associated with implantable cardioverter  
5 defibrillator or with ischaemic heart disease verified by coronary angiography, who have a partner,  
6 speak and understand Danish, and provide a written informed consent, are considered eligible for  
7 participation. Exclusion criteria are patients at intermediate or high risk in relation to their  
8 cardiovascular status according to recommendations from the Princeton consensus group<sup>32, 53</sup>; those  
9 with diseases in the urinary tract; those who perform competitive exercise more than 3 hours a  
10 week; patients with neurological or orthopaedic deficits which prevent training; patients with  
11 cognitive deficits which prevents consultations; and patients who are included in ongoing research  
12 prohibiting additional research participation. A diagram showing the flow of participants through  
13 each stage of the randomized trial will be made. (*See figure 1*)  
14  
15  
16  
17  
18  
19  
20  
21

### 22 **Experimental intervention**

23  
24 The experimental intervention is a comprehensive sexual rehabilitation programme. Sexual  
25 rehabilitation in this trial is defined as: a time-bounded planned process with clear goals and means.  
26 Sexual rehabilitation is a process where several actors, including the patient, are working towards  
27 regaining improved sexual functioning and coping ability according to their sexual function. The  
28 comprehensive sexual rehabilitation programme contains a physical exercise component, including  
29 training of the pelvic floor and a psycho-educational component.  
30  
31  
32  
33  
34  
35

### 36 **The physical components**

#### 37 *Physical exercise*

38  
39 The goal of physical exercise is to achieve an improvement in the patient's physical work capacity,  
40 and to eliminate the fear and uncertainty the patient may feel in relation to sexual activity as a form  
41 of physical activity. The physical exercise intervention is based on The European Society of  
42 Cardiology recommendations for physical activity for cardiovascular patients.<sup>54</sup> The European  
43 Society of Cardiology recommends that all adults promote and maintain their fitness, muscle  
44 strength, flexibility and bone health several hours a week. Training must be of high intensity and of  
45 30 minutes duration.<sup>54</sup> Furthermore, the intervention is supported by European recommendations  
46 for physical training in cardiac patients<sup>55</sup> and has been tested in COPE-ICD and DANREHAB  
47 trials.<sup>56, 57</sup> A professional physiotherapist with specific knowledge of cardiac rehabilitation initiates  
48 the physical exercise programme. Together with the patient, the physiotherapist plans and prepares  
49 a physical exercise protocol, taking into account the patient's clinical condition and physical  
50  
51  
52  
53  
54  
55  
56  
57  
58  
59  
60

abilities. Sixty minutes is allocated for the initial consultation and preparation of individual training protocol, including pelvic floor exercise instructions.

Physical exercise is initiated at a physiotherapist-supervised setting at the Heart Centre, Rigshospitalet. Using wireless electrodes integrated into t-shirts (Corus-Fit, CardioCardio and Corus Exercise Assistant, version 2.0.16, Finland) potential cardiac arrhythmias, electrocardiographic abnormalities such as ST segment changes, T-wave alterations, atrial or ventricular arrhythmias, and training intensity level are monitored. The training is initiated with two to three mandatory exercise sessions at Rigshospitalet. Subsequently, the patients can choose to continue the intensive physical exercise regimen either at Rigshospitalet, or at a local CopenHeart-certified facility, supervised by physiotherapists, or as supervised home-based training. Supervised home-based physical training has previously shown similar results to hospital-based training.<sup>58</sup> This finding has been confirmed in a Danish setting.<sup>59</sup>

One session is structured with 10 minutes (min) warm-up bicycling, 20 min bicycling with increased intensity (cardiovascular training), 20 min strength exercises, and 10 min stretching and cool-down period. The warm-up session is performed at the intensity of 11 to 12 on the Borg scale.<sup>60</sup> The 20 min cardiovascular training is performed as interval training. Each session is divided into three sections. Each section contains intensity 13 to 17 on the Borg scale and time limit (2 to 15 min) varying between each section; the second section with longest and highest intensity. A cool down period of 5 min is included after the 20 min of cardiovascular training. The strength and strength-related exercises primarily target lower body muscles, and comprise the following four exercises: (1) heel rise performed by repetitions of maximal flexion from standing position; (2) step-up by using a step bench of 27 cm; (3) leg press standardised, starting with 90 degrees flexion, hyperextension not accepted; (4) 90 degrees pull-down performed in a cable machine to target abdominal muscles. For step-ups and heel-rises, weight load is calculated as a percentage of body weight (5 to 20%) and increased throughout the 12 weeks. Load for leg press is estimated from repetition maximum (RM) testing and increases from 60% of 1 RM to 70% of 1 RM during the 12 weeks of training. All exercises are initiated by 2x12 repetitions and increased through the programme according to standard guidelines for strength training.<sup>61</sup>

To achieve cardiovascular adjustment the training begins with a warming-up period and ends with a cool-down period. This cardiovascular adjustment has been shown to reduce the risk of ischaemia and arrhythmia in connection to physical exercise.<sup>44, 62</sup> Participants must mainly exercise in an

1  
2  
3  
4 upright position to decrease left ventricular filling pressure and risk of ischaemia or heart-failure-  
5 triggered ventricular arrhythmias.<sup>62</sup>  
6  
7

### 8 9 *Pelvic floor exercise*

10 The bulbocavernosus muscle and the ischiocavernosus muscle, two superficial pelvic floor muscles,  
11 are active during erection and enhance rigidity. The bulbocavernosus muscle encircles 33% to 50%  
12 of the base of the penis.<sup>41</sup> The pelvic floor training regimen is inspired by Dorey and colleagues,  
13 who have developed a training regimen for male patients for use in randomised clinical trials.<sup>63</sup> The  
14 regiment is developed and tested in a different patient population, and we have therefore modified it  
15 to fit cardiovascular patients. Patients are instructed in pelvic floor exercises by a skilled  
16 physiotherapist. Patients are instructed to perform their pelvic floor exercises twice daily. Studies  
17 showed that a few strong or maximum contractions are more effective when it comes to gaining  
18 muscle hypertrophy than several less strong contractions.<sup>63</sup> Patients are instructed to tighten their  
19 pelvic floor muscles as strongly as possible (as if to prevent flatus from escaping) three times when  
20 lying, three times when sitting, and three times when standing. The duration of the contraction is up  
21 to 10 seconds each, and patients are informed to have a 10 second break between each contraction.  
22 The physiotherapist instructs the patients on how to contract the bulbocavernosus and  
23 ischiocavernosus muscles. In order to ensure that the right muscles are involved, attention is placed  
24 on the ability to lift the scrotum and retract the penis. To obtain some degree of pelvic floor muscle  
25 endurance, the patients are encouraged to tighten the pelvic floor muscles when walking.  
26 To monitor compliance pulse watches (Polar watch) with extended memory and exercise training  
27 logs are handed out. A training log contains information about physical exercise as well as pelvic  
28 floor exercise. At the end of the intervention the training log and the pulse watch are returned and  
29 compliance and intensity level are coded independently.  
30  
31  
32  
33  
34  
35  
36  
37  
38  
39  
40  
41  
42  
43  
44  
45

### 46 **The psycho-educational components**

47 The goal of the psycho-educative intervention is that the patient learns to interpret and react to  
48 relevant physical and psychological symptoms, learns to cope with anxiety and fear, including  
49 strategies to manage depressive symptoms and ability to be sexually active without fear.  
50 A specially trained nurse is responsible for the psycho-educative intervention. The intervention  
51 takes a theoretical basis of the patient-centred approach where the emphasis is on support and  
52 education. The conversations are based on a holistic view of the patient and focus on the handling  
53  
54  
55  
56  
57  
58  
59  
60

1  
2  
3  
4 of life and managing sexual dysfunction. The intervention is targeted at the modifiable parameters  
5 that are reported to affect sexual dysfunction. The psycho-educative intervention is inspired by RR  
6 Parse's 'Human Becoming Practice Methodologies' three dimensions<sup>64</sup>, which can be described as:  
7 1. discuss and give meaning to the past, present and future, 2. explore and discuss events and  
8 opportunities; and 3. pursue imagined possibilities. According to this theory, there are three ways to  
9 alter its perceived health: creative ideas, see, hear and feel how a situation could be if it was lived in  
10 a different way; recognising personal patterns and value priorities and shed light on the paradoxes  
11 by looking at incongruence in a situation and change the view of reality. The nurse is 'truly present'  
12 in the process through discussion, quiet contemplation, and reflection. The psycho-educative  
13 intervention plus physical exercise was tested in the COPE-ICD trial, with positive effects on  
14 psychological well-being (mental health) and the general health sub-scale of the SF-36.<sup>56</sup> The nurse  
15 is trained in the psycho-educative conversation through teaching and supervision of nurses who  
16 have experience with the 'Human Becoming Practice Methodology' from the COPE-ICD trial. It is  
17 based on the theoretical literature that forms the basis for understanding the processes of practice  
18 methodology and existing specialty specific knowledge about heart disease, related symptoms, and  
19 sexology. The supervisor observes and provides feedback in relation to the methods and goals of the  
20 conversation. The emphasis is on openness in the interviews, and on the nurse's ability to: be  
21 silently present while the patient talks, ask questions that encourage reflection, let the patient find  
22 answers and solutions and contribute with knowledge, provide advice and guidance when requested  
23 and relevant. The training of the nurse takes place prior to the intervention. In practice the  
24 intervention will be handled by one nurse with several years of experience working with cardiac  
25 patients and trained in sexology. The sexology experience is gained in a two-week intensive course  
26 on basic and clinical sexology including training in sexual therapy. Supervision from a sexologist is  
27 available during the intervention. The nurse will conduct consultations with patients individually,  
28 and patients are informed that they are welcome to bring spouses/relatives. The consultation will  
29 take place in a quiet room in an outpatient settings and last for 45 minutes. An inspirational guide  
30 will form the basis for the consultations. The guide consists of several elements and issues (medical,  
31 psychosocial, educational and sexual) that work as inspiration (see table 1):  
32  
33  
34  
35  
36  
37  
38  
39  
40  
41  
42  
43  
44  
45  
46  
47  
48  
49  
50  
51  
52  
53  
54  
55  
56  
57  
58  
59  
60

**Table 1. Inspiration guide for psycho-educational consultations**

|                                                                                 |
|---------------------------------------------------------------------------------|
| A brief medical history                                                         |
| Actual thoughts and questions regarding their heart disease and sexual function |
| Sexual dysfunction                                                              |
| Safety issues                                                                   |
| Angina or ICD shock                                                             |
| How the sexual problems affect daily live                                       |
| Provide the patient with recommendations                                        |
| Relationship                                                                    |

### **Usual care**

Participants in the experimental group and in the control group will receive the usual care according to current guidelines. Usual care is, for patients for whom it is not contraindicated, treatment with PDE5 inhibitors. Patients who are candidates for PDE5 inhibitors are encouraged to contact their general practitioner in order to establish the treatment. Use of PDE5 inhibitors will be monitored in both intervention groups. To assess outcome measures, patients in the control group will be asked to complete questionnaires on equal terms with participants in the experimental group. In addition, they will be tested in the form of cardiopulmonary testing (peak VO<sub>2</sub>) and pelvic floor muscle strength and endurance at baseline and at the end of the trial.

### **Outcomes and data collection**

In order to evaluate the effect of comprehensive sexual rehabilitation programme numerous data will be collected.

#### *Primary outcome*

Sexual function will be measured by the International Index of Erectile Function (IIEF) questionnaire after 16 weeks and 6 months. International Index of Erectile Function (IIEF) was developed in conjunction with the clinical trial program for sildenafil, and has since been adopted as

1  
2  
3  
4 the 'gold standard' measure for efficacy assessment in clinical trials of erectile dysfunction. It has  
5 been linguistically validated in 32 languages including Danish and used as a primary outcome in  
6 more than 50 clinical trials.<sup>34, 45, 46</sup> It consists of 15 items including five domains of sexual function:  
7 erectile function, orgasmic function, sexual desire, intercourse satisfaction, and overall satisfaction.  
8 The IIEF meets psychometric criteria for test reliability and validity, and has a high degree of  
9 sensitivity and specificity.<sup>46</sup> The IIEF is self-assessed, which in sexological research is widely used  
10 and well acclaimed.

### 11 12 13 14 15 16 17 18 *Secondary outcome*

19  
20 Sexual function is measured by the Psychosocial Adjustment to Illness Scale (self-reported version)  
21 (PAIS-SR) sexual relationship domain.<sup>47</sup> The overall PAIS-SR measure psychosocial adjustment to  
22 illness in terms of 7 primary domains of adjustment: Health Care Orientation, Vocational  
23 Environment, Domestic Environment, Sexual Relationships, Extended Family Relationships, Social  
24 Environment and Psychological Distress. Each PAIS/PAIS-SR item is rated on a 4-point (0 through  
25 3) scale of adjustment, with higher ratings indicating poorer adjustment status. The sexual  
26 relationship domain evaluates shifts in the quality of sexual relations due to the current illness or  
27 treatment. It consists of six items and the total score ranges from 0 to 18. Low scores indicates good  
28 adjustment, and high scores poor adjustment.

### 29 30 31 32 33 34 35 36 37 *Exploratory outcomes*

38  
39 A more extensive evaluation of physical, psychological, and demographic status over time will be  
40 performed. Physical examination will include pelvic floor strength and endurance assessed  
41 according to the Modified Oxford grading scheme which is a manual digital examination of the  
42 pelvic floor. It is tested and validated and used in several trials.<sup>65, 66</sup> Furthermore physical capacity  
43 will be measured by peak VO<sub>2</sub> using cardiopulmonary exercise testing (Ergo-Spiro CS-200,  
44 Schiller, Switzerland) with measurement of oxygen uptake (VO<sub>2</sub>), heart rate (HR, beats  
45 /min), ventilation rate (VE, l/min), ventilation frequency (VF, number / min), respiratory expiration  
46 ratio (RER, CO<sub>2</sub>/O<sub>2</sub>in%), blood pressure, physical activity level (METS) and gas exchange (VO<sub>2</sub>  
47 and VCO<sub>2</sub>) during progressive loading and in the following recovery period. The test is conducted  
48 before the training programme initiates. Intensity performed as a ramp protocol (load gradually  
49 increases) with the initial work load of 25W and increased by 12.5W every minute until exhaustion,  
50  
51  
52  
53  
54  
55  
56  
57  
58  
59  
60

usually but not always, is where the patient's oxygen uptake reaches steady state despite additional load. The test follows current standards for cardiopulmonary exercise testing.<sup>67</sup> The full test procedure is described by Rasmussen et al.<sup>50</sup> Additionally a series of questionnaires, regarding health related quality of life, anxiety and depression and sexual dysfunction are administered. (see table 2)

**Table 2 CopenHeart<sub>SF</sub> - Exploratory quantities subjected to post hoc analysis**

| Quantity                                                                                                                                                       | Time of measure        | Type of quantity |
|----------------------------------------------------------------------------------------------------------------------------------------------------------------|------------------------|------------------|
| <b>Demographic</b>                                                                                                                                             |                        |                  |
| Age, height, weight                                                                                                                                            | Baseline               | Continuous       |
| Marital, educational, occupational status                                                                                                                      | Baseline               | Categorical      |
| Smoking                                                                                                                                                        | Baseline               | Binary (Y/N)     |
| <b>Clinical</b>                                                                                                                                                |                        |                  |
| Nutritional status (BMI)                                                                                                                                       | Baseline               | Continuous       |
| NYHA classification                                                                                                                                            | Baseline               | Continuous       |
| Type of heart disease                                                                                                                                          | Baseline               | Categorical      |
| Type of sexual dysfunction                                                                                                                                     | Baseline               | Categorical      |
| Diabetes mellitus                                                                                                                                              | Baseline               | Binary (Y/N)     |
| Level of physical activity                                                                                                                                     | Baseline               | Categorical      |
| Level of rehabilitation offered                                                                                                                                | Baseline               | Categorical      |
| PDE-5 inhibitor intake, Level of activity within the last 4 weeks, Level of sexual activity                                                                    | Baseline, W12, W16, M6 | Categorical      |
| <b>Para clinical</b>                                                                                                                                           |                        |                  |
| Cholesterol level                                                                                                                                              | Baseline               | Continuous       |
| <b>Functional capacity</b>                                                                                                                                     |                        |                  |
| Peak VO <sub>2</sub>                                                                                                                                           | Baseline, W12          | Continuous       |
| Pelvic floor strength and endurance                                                                                                                            | Baseline, W12          | Continuous       |
| <b>Serious adverse events</b>                                                                                                                                  |                        |                  |
| <b>Questionnaires</b>                                                                                                                                          |                        |                  |
| SF-36 <sup>68</sup> , HADS <sup>69</sup> , EQ-5D-5L <sup>70</sup> , FAME <sup>71</sup> , Sex after ICD questionnaire <sup>16</sup>                             | Baseline, W16, M6      | Continuous       |
| BMI, body mass index; SF-36, Short Form-36; HADS, Hospital Anxiety and Depression Scale; Eq-5D-5L, EuroQol; FAME, Female assessment of male erectile function, |                        |                  |

### Blinding

It is not possible to blind the allocated intervention group for the staff and the participants.<sup>72</sup> All physical testing, data collection and administration will be conducted by blinded staff, however. Statistical analyses and drawing of conclusions from these will also be conducted blinded to the intervention group.

### Sample size and power calculations

We are planning a trial of the continuous response variable IIEF<sup>45, 46</sup> from independent control and experimental participants with one control per experimental participant. In a previous trial the IIEF within each participant group was normally distributed with a standard deviation of 6 points.<sup>34</sup> If the true difference in the experimental and control means is 3.5 points, we will need to include 77 experimental participants and 77 control participants (total 154 participants) to obtain a power of 95% (beta = 5%) and a type 1 error probability of 5%. Using this sample size, a standard deviation of 4 points and an alternative hypothesis of a mean difference of 2 points for the secondary outcome and a type 1 error probability of 5% the corresponding power for the secondary outcome is found to be 87%.

### Study procedure and randomisation

To achieve our estimated sample size of 154 participants, patients will be identified from the hospital databases. Patients will be selected consecutively. Patients with an implantable cardioverter defibrillator are required to have the device implanted more than one year prior to inclusion and patients with ischaemic heart disease one year from event and backward. The one year limit has been set so that patients are past their rehabilitation if any is provided. Patients will receive the International Index of Erectile Function questionnaire<sup>45</sup> by mail including a stamped return envelope. Patients with a score less than or equal to 25, the accepted cut-off score<sup>46</sup>, on the initial screening are invited to attend a preliminary interview with the offer to participate in a randomised clinical trial targeting sexual problems. The participant information is send to the patient along with the invitation. This gives the patient an opportunity to read the material in advance and to prepare possible questions. At the initial interview/meeting it is determined whether the patient meets the criteria for participating in the trial. If patients are suited and want to participate they will be randomised to either a comprehensive sexual rehabilitation programme plus usual care versus usual care alone. Stratification will be according to patient group (patients with ischaemic heart disease or implantable cardioverter defibrillator) and age ( $\leq 59$  years or  $\geq 60$  years and randomised 1:1 to the experimental group or the control group. Randomisation will be performed centrally by the trial coordination centre, Copenhagen Trial Unit, according to a computer-generated allocation sequence with a variable block size concealed from the investigators. Allocation to the intervention groups is



1  
2  
3  
4 done when the investigator calls Copenhagen Trial Unit. Relevant information (personal  
5 identification number, strata, etc.) is typed into a computer system, and then the participant will be  
6 allocated to an intervention group and awarded a four-digit randomisation number. The investigator  
7 then informs the patient of the result and on how to proceed by letter. Thus, neither investigators  
8 nor patients or relatives can influence to which group the patient are allocated. For both groups,  
9 follow-up assessment will take place after 12 weeks (only physical evaluation), 16 weeks, and 6  
10 months. Questionnaires will be completed electronically in the questionnaire system Enalyzer with  
11 'single user', which meets the data legislation for logging. At inclusion, the trial participant will  
12 receive an email with a link to a website through which questionnaires can be completed. The e-  
13 mail contains a login and password for the trial participant's personal access. The participant has the  
14 opportunity to go through the website [www.copenheart.org](http://www.copenheart.org) and login with the log-in and password.  
15 If patients do not complete the questionnaire electronically, the material can be sent in paper form  
16 and independent trial personnel then enters the responses into the database. Thus data management  
17 is handled independently from the researchers who interpret the data.  
18  
19  
20  
21  
22  
23  
24  
25  
26  
27  
28

## 29 **Statistical analysis**

### 30 *Analysis of primary and secondary outcomes*

31  
32 The analysis will be performed according to the intention-to-treat analysis with two sided  
33 significance tests at the 0.05 level. Both outcomes (and outcomes subjected to exploratory analyses)  
34 will be analysed using the same procedure. First, we will test if there is an immediate effect of the  
35 intervention on the outcome and/or a difference in the response to the intervention between the two  
36 patient groups (patients with ischaemic heart disease and patients with implantable cardioverter  
37 defibrillator) using model 1 below. Then the follow-up data will be included in the analysis and the  
38 long-term effect will be studied using model 2.  
39  
40  
41  
42  
43  
44

### 45 *Models and analytical techniques*

46  
47 *Model 1* The equation (equation 1) showing the dependent variable Y (the outcome) as a function of  
48 covariates used in the analysis of the immediate effect of the intervention on the primary outcome  
49 is  $Y = \text{intercept} + a \cdot Y_{\text{baseline}} + b \cdot I + c \cdot G + d \cdot I:G$  (equation 1).  
50

51  
52  $Y_{\text{baseline}}$  is the baseline value of the outcome, I is the indicator of intervention, G is the indicator of  
53 patient group, and a through d are coefficients to be estimated. The term d·I:G stands for interaction  
54 between the two covariates I and G. If the term b·I is significant (the coefficient b differs  
55  
56  
57  
58  
59  
60

1  
2  
3  
4 significantly from 0) there is an effect of the intervention common for the two patient groups  
5 (ischaemic patients and patients with implantable cardioverter defibrillator). If the term d:I:G is  
6 significant there is an additional effect of the intervention in one of the two patient groups; thus a  
7 sub-group analysis is warranted. In the analysis of the data the univariate general linear model is  
8 used. The analysis of the primary outcome is the primary analysis. The sub-group analysis and the  
9 analysis of the secondary and of other outcomes should be considered exploratory.  
10  
11  
12  
13

14  
15  
16 *Model 2* In the analysis of follow up data the time T (Y is measured 16 weeks and 6 month  
17 following randomisation) is included and the mixed model for repeated measures is used. The  
18 equation (equation 2) for the fixed effect in this model showing Y as a function of the co-variables  
19 is  $Y = \text{intercept} + a \cdot Y_{\text{baseline}} + b \cdot G + c \cdot I + d \cdot I:G + e \cdot T + f \cdot I:T + g \cdot I:T:G$  (equation 2) where a through g  
20 are coefficients to be estimated. If the term e:T is significant there is a linear trend over time  
21 common for both patient groups. If f:I:T is significant, this trend is supplemented by an additional  
22 trend caused by the intervention and therefore specific for the intervention group. If in addition  
23 g:I:T:G is significant this added trend differs between the two patient groups (patients with  
24 ischaemic heart disease and patients with implantable cardioverter defibrillator). In the mixed  
25 model analysis an unstructured covariance matrix will be assumed. If convergence is not attained  
26 simpler covariance structure models will be assessed guided by Akaike's criterion or maximum  
27 likelihood test as appropriate.  
28  
29  
30  
31  
32  
33  
34  
35  
36

### 37 *Missing values*

38  
39 If the number of missing cases for a given outcome (number of patients with one or more model  
40 variables missing) is larger than 5% or p of Little's test is < 5% multiple imputations of the model  
41 variables (outcome plus co-variables) is done using SPSS version 17. The range of potential bias in  
42 case the missing values should not be random is assessed by doing two imputations (1) imputing  
43 missing outcome value in one group by minimum value found in the material and missing outcome  
44 value in the other group by maximum value found in material and (2) vice versa. Then in each case  
45 an unadjusted analysis is done to estimate the parameter of interest.  
46  
47  
48  
49  
50  
51

## 52 **ETHICS AND DISSEMINATION**

53  
54 Trial protocol has been approved by the Regional Ethics Committee (no H-4-2012-168) and the  
55 Danish Data Protection Agency (no 2007-58-0015). The trial complies with the latest declaration of  
56  
57  
58  
59  
60

1  
2  
3  
4 Helsinki and is registered at ClinicalTrials.gov (NCT01796353). Patients are informed about the  
5 trial in writing as well as verbally and only included if a written informed consent is obtained.  
6  
7 Patients are assessed in accordance to whether it is safe for them to perform sexual activity. This is  
8 done according to recommendations from the Princeton consensus group.<sup>32, 53</sup> If patients are suited  
9 and want to participate they will be enrolled in the trial. Trial participants are free to withdraw their  
10 informed consent at any time and be treated according to the departments' standard treatment  
11 procedures. A patient will be withdrawn from the trial if the trial participant withdraws his consent  
12 and will, in connection therewith, be informed that termination of the trial will have no implications  
13 for his future treatment. Patients who leave the trial will be politely asked for permission to  
14 continue to collect data and to use already collected data. If the patient gives permission, he will be  
15 included in the final analysis. Only if the patient refuses use of already collected data, will all data  
16 relating to him, be destroyed. All patient data will be handled and stored in accordance with Danish  
17 Data Protection Agency rules and patients are ensured anonymity. The trial will be conducted  
18 according to the Act. No. 593 of June 14 2011 on Act on Research Ethics Review of Health  
19 Research Projects. The investigator will immediately notify the regional ethics committee if, within  
20 the interventions period, there occur Serious Adverse Events, Serious Adverse Reactions, or  
21 Suspected Unexpected Serious Adverse Reactions. The report will be accompanied by comments  
22 on possible implications for the trial, and notification will be made within 7 days after the  
23 investigator has knowledge of the event. An internal monitor will perform random checks to see if  
24 the trial staff work according to the protocol. No risks are anticipated to occur during the sexual  
25 rehabilitation programme. As far as we know, there is no previous risk associated with nursing  
26 consultations. If the nurse during the consultation identifies a need for further consultations with  
27 professionals, she will encourage the participant to seek help from the general practitioner,  
28 psychologist, or in their usual outpatient setting. Risks associated with exercise training and testing  
29 are sudden cardiac death associated with ventricular arrhythmias, acute myocardial infarction, and  
30 in patients with chronic heart failure, pulmonary oedema and deterioration in left ventricular  
31 function.<sup>73</sup> The last is only found in one study from 1988<sup>74</sup> and has not subsequently been  
32 demonstrated in larger studies.<sup>75, 76</sup> In a recent French study of more than 25,000 patients with  
33 ischaemic heart disease, one third with chronic heart failure found the risk of cardiac complications  
34 at 1:8,500 exercise testing and 1:50,000 patient exercise hours.<sup>77</sup> Increasing exercise intensity and  
35 age are risk indicators. Therefore, the training intensity will be conducted as moderate high intensity  
36 (less than 80% of VO<sub>2</sub> max). To achieve cardiovascular adjustment both exercise training and  
37  
38  
39  
40  
41  
42  
43  
44  
45  
46  
47  
48  
49  
50  
51  
52  
53  
54  
55  
56  
57  
58  
59  
60

1  
2  
3  
4 testing begins with a warming-up period and ends with a cool-down period, with a gradual  
5 downward adjustment of exercise intensity and heart rate, rather than an abrupt end. This  
6 cardiovascular adjustment has been shown to reduce the risk of ischaemia and arrhythmia in  
7 connection with physical exercise.<sup>44, 62</sup> Participants must mainly exercise in an upright position to  
8 decrease left ventricular filling pressure and risk of ischemia or heart failure triggered ventricular  
9 arrhythmias. When these precautions are respected, both exercise training and exercise testing are  
10 considered to possess a low risk for the participants. There is, as far as we know, no previously  
11 known risk associated with pelvic floor exercise. Testing or examination of the pelvic floor may be  
12 associated with discomfort for the participants but is not considered to be associated with any risk.  
13 Staff members will be trained according to guidelines to handle any emergencies.  
14  
15  
16  
17  
18  
19  
20  
21

### 22 **Dissemination plan**

23  
24 Positive, neutral, and negative results of the trial will be submitted to international peer reviewed  
25 journals of nursing, cardiology or sexology. Furthermore, results will be presented at national and  
26 international conferences relevant to subject fields. Authorship will be allocated using the  
27 guidelines for authorship defined by the International Committee of Medical Journal Editors and  
28 depends on the personal involvement. All the articles, abstracts as well as the results will be posted  
29 on the website [www.copenheart.org](http://www.copenheart.org). The website will be continuously updated and will be  
30 highlighted through the scientific articles.  
31  
32  
33  
34  
35  
36

### 37 **DISCUSSION**

38  
39 This randomised clinical trial testing the effect of a comprehensive sexual rehabilitation  
40 intervention on a population of patients with implantable cardioverter defibrillator or patients with  
41 ischaemic heart disease seems to be the first one in its field. The trial is expected to contribute with  
42 results that can improve patients' problems related to heart disease and sexual function.  
43  
44

45 Additionally, it is believed that the trial can provide a systematic approach that may one day inform  
46 national consensus on how to treat sexual dysfunction in heart patients. Furthermore, the results of  
47 the trial are expected to contribute to the international debate on sexual rehabilitation of patients  
48 with heart disease.  
49  
50

51  
52 The trial is designed with central stratified randomisation<sup>78, 79</sup>, blinded assessment and analysis of  
53 outcomes<sup>78, 79</sup>, multicentre participation and meets the SPIRIT and CONSORT criteria for high  
54 quality in non-pharmacological randomised clinical trials.<sup>72, 80</sup>  
55  
56  
57  
58  
59  
60

**Trajectory**

Inclusion was initiated February 2013 and is expected to continue until June 2014.

**Acknowledgements:**

The test and rehabilitation team responsible for the trial is: Karina Jensen, Lars Tang, Helena Tjalk Sørensen, Signe Gils and Katrine Tingholm Erhardsen.

**Funding statement:**

The CopenHeart trial has received funding from: The Danish Heart Foundation (no. 13-04-R95-A4669-22744); The Health Foundation (no. 2013B208 ); Danish Council for Strategic Research (no. 10-092790); The Danish Nursing Council. Neither of the funders had influence of the study protocol and design, the execution of the trial or the interpretation of data.

**Competing interest:**

None

**REFERENCES**

1. Hoekstra T, Jaarsma T, Sanderman R, van Veldhuisen DJ, Lesman-Leege I. Perceived sexual difficulties and associated factors in patients with heart failure. *Am Heart J* 2012; Feb;163(2):246-51.
2. Laumann EO, Paik A, Rosen RC. Sexual dysfunction in the United States: prevalence and predictors. *JAMA* 1999; Feb 10;281(6):537-44.
3. Feldman HA, Goldstein I, Hatzichristou DG, Krane RJ, McKinlay JB. Impotence and its medical and psychosocial correlates: results of the Massachusetts Male Aging Study. *J Urol* 1994; Jan;151(1):54-61.

- 1  
2  
3  
4 4. Feldman HA, Johannes CB, Derby CA, Kleinman KP, Mohr BA, Araujo AB, et al. Erectile  
5  
6 dysfunction and coronary risk factors: prospective results from the Massachusetts male aging study.  
7  
8 *Prev Med* 2000; Apr;30(4):328-38.
- 9  
10  
11 5. Bacon CG, Mittleman MA, Kawachi I, Giovannucci E, Glasser DB, Rimm EB. Sexual function  
12  
13 in men older than 50 years of age: results from the health professionals follow-up study. *Ann Intern*  
14  
15 *Med* 2003; Aug 5;139(3):161-8.
- 16  
17  
18 6. Levine GN, Steinke EE, Bakaen FG, Bozkurt B, Cheitlin MD, Conti JB, et al. Sexual activity  
19  
20 and cardiovascular disease: a scientific statement from the American Heart Association. *Circulation*  
21  
22 2012; Feb 28;125(8):1058-72.
- 23  
24  
25 7. Steinke EE. Sexual dysfunction in women with cardiovascular disease: what do we know?. *J*  
26  
27 *Cardiovasc Nurs* 2010; Mar-Apr;25(2):151-8.
- 28  
29  
30 8. Lewis RW, Fugl-Meyer KS, Corona G, Hayes RD, Laumann EO, Moreira ED, Jr, et al.  
31  
32 Definitions/epidemiology/risk factors for sexual dysfunction. *J Sex Med* 2010; Apr;7(4 Pt 2):1598-  
33  
34 607.
- 35  
36  
37 9. NIH Consensus Conference. Impotence. NIH Consensus Development Panel on Impotence.  
38  
39 *JAMA* 1993; Jul 7;270(1):83-90.
- 40  
41  
42 10. Rastogi S, Rodriguez JJ, Kapur V, Schwarz ER. Why do patients with heart failure suffer from  
43  
44 erectile dysfunction? A critical review and suggestions on how to approach this problem. *Int J*  
45  
46 *Impot Res* 2005; Dec;17 Suppl 1:S25-36.
- 47  
48  
49  
50  
51  
52  
53  
54  
55  
56  
57  
58  
59  
60

- 1  
2  
3  
4 11. Berg SK, Elleman-Jensen L, Zwisler AD, Winkel P, Svendsen JH, Pedersen PU, et al. Sexual  
5 concerns and practices after ICD implantation: findings of the COPE-ICD rehabilitation trial. *Eur J*  
6 *Cardiovasc Nurs* 2013; Jan 8;.  
7  
8  
9  
10  
11 12. Bortolotti A, Parazzini F, Colli E, Landoni M. The epidemiology of erectile dysfunction and its  
12 risk factors. *Int J Androl* 1997; Dec;20(6):323-34.  
13  
14  
15  
16  
17 13. Herbert K, Lopez B, Castellano J, Palacio A, Tamari L, Arcemen LM. The prevalence of  
18 erectile dysfunction in heart failure patients by race and ethnicity. *Int J Impot Res* 2008; Sep-  
19 Oct;20(5):507-11.  
20  
21  
22  
23  
24  
25 14. Kloner RA, Mullin SH, Shook T, Matthews R, Mayeda G, Burstein S, et al. Erectile dysfunction  
26 in the cardiac patient: how common and should we treat?. *J Urol* 2003; Aug;170(2 Pt 2):S46,50;  
27 discussion S50.  
28  
29  
30  
31  
32  
33 15. Montorsi F, Briganti A, Salonia A, Rigatti P, Margonato A, Macchi A, et al. Erectile  
34 dysfunction prevalence, time of onset and association with risk factors in 300 consecutive patients  
35 with acute chest pain and angiographically documented coronary artery disease. *Eur Urol* 2003;  
36 Sep;44(3):360,4; discussion 364-5.  
37  
38  
39  
40  
41  
42  
43 16. Steinke EE. Sexual concerns of patients and partners after an implantable cardioverter  
44 defibrillator. *Dimens Crit Care Nurs* 2003; Mar-Apr;22(2):89-96.  
45  
46  
47  
48  
49 17. Dabrowski R, Smolis-Bak E, Kowalik I, Kazimierska B, Wojcicka M, Szwed H. Quality of life  
50 and depression in patients with different patterns of atrial fibrillation. *Kardiol Pol* 2010;  
51 Oct;68(10):1133-9.  
52  
53  
54  
55  
56  
57  
58  
59  
60

- 1  
2  
3  
4 18. Drory Y, Kravetz S, Weingarten M. Comparison of sexual activity of women and men after a  
5 first acute myocardial infarction. *Am J Cardiol* 2000; Jun 1;85(11):1283-7.  
6  
7  
8  
9  
10 19. Foroutan SK, Rajabi M. Erectile dysfunction in men with angiographically documented  
11 coronary artery disease. *Urol J* 2007; Winter;4(1):28-32.  
12  
13  
14  
15 20. Justo D, Arbel Y, Mulat B, Mashav N, Saar N, Steinvil A, et al. Sexual activity and erectile  
16 dysfunction in elderly men with angiographically documented coronary artery disease. *Int J Impot*  
17 *Res* 2010; Jan-Feb;22(1):40-4.  
18  
19  
20  
21  
22  
23 21. Dunn KM, Croft PR, Hackett GI. Association of sexual problems with social, psychological,  
24 and physical problems in men and women: a cross sectional population survey. *J Epidemiol*  
25 *Community Health* 1999; Mar;53(3):144-8.  
26  
27  
28  
29  
30  
31 22. Friedman S. Cardiac disease, anxiety, and sexual functioning. *Am J Cardiol* 2000; Jul  
32 20;86(2A):46F-50F.  
33  
34  
35  
36 23. Kriston L, Gunzler C, Agyemang A, Bengel J, Berner MM, SPARK Study Group. Effect of  
37 sexual function on health-related quality of life mediated by depressive symptoms in cardiac  
38 rehabilitation. findings of the SPARK project in 493 patients. *J Sex Med* 2010; Jun;7(6):2044-55.  
39  
40  
41  
42  
43  
44 24. Mulat B, Arbel Y, Mashav N, Saar N, Steinvil A, Heruti R, et al. Depressive symptoms and  
45 erectile dysfunction in men with coronary artery disease. *Urology* 2010; Jan;75(1):104-7.  
46  
47  
48  
49  
50 25. Makhlof A, Kparker A, Niederberger CS. Depression and erectile dysfunction. *Urol Clin*  
51 *North Am* 2007; Nov;34(4):565,74, vii.  
52  
53  
54  
55  
56  
57  
58  
59  
60



- 1  
2  
3  
4 26. Roose SP. Depression: links with ischemic heart disease and erectile dysfunction. *J Clin*  
5  
6 *Psychiatry* 2003;64 Suppl 10:26-30.  
7  
8
- 9  
10 27. Dickstein K, Cohen-Solal A, Filippatos G, McMurray JJ, Ponikowski P, Poole-Wilson PA, et al.  
11  
12 ESC Guidelines for the diagnosis and treatment of acute and chronic heart failure 2008: the Task  
13  
14 Force for the Diagnosis and Treatment of Acute and Chronic Heart Failure 2008 of the European  
15  
16 Society of Cardiology. Developed in collaboration with the Heart Failure Association of the ESC  
17  
18 (HFA) and endorsed by the European Society of Intensive Care Medicine (ESICM). *Eur Heart J*  
19  
20 2008; Oct;29(19):2388-442.  
21  
22
- 23  
24 28. Heart Failure Society Of A. HFSA 2006 Comprehensive Heart Failure Practice Guideline. *J*  
25  
26 *Card Fail* 2006; Feb;12(1):e1-2.  
27  
28
- 29  
30 29. Bedell SE, Duperval M, Goldberg R. Cardiologists' discussions about sexuality with patients  
31  
32 with chronic coronary artery disease. *Am Heart J* 2002; Aug;144(2):239-42.  
33  
34
- 35  
36 30. Jaarsma T, Stromberg A, Fridlund B, De Geest S, Martensson J, Moons P, et al. Sexual  
37  
38 counselling of cardiac patients: nurses' perception of practice, responsibility and confidence. *Eur J*  
39  
40 *Cardiovasc Nurs* 2010; Mar;9(1):24-9.  
41  
42
- 43  
44 31. Jackson G, Boon N, Eardley I, Kirby M, Dean J, Hackett G, et al. Erectile dysfunction and  
45  
46 coronary artery disease prediction: evidence-based guidance and consensus. *Int J Clin Pract* 2010;  
47  
48 Jun;64(7):848-57.  
49  
50
- 51  
52 32. Jackson G, Rosen RC, Kloner RA, Kostis JB. The second Princeton consensus on sexual  
53  
54 dysfunction and cardiac risk: new guidelines for sexual medicine. *J Sex Med* 2006; Jan;3(1):28,36;  
55  
56 discussion 36.  
57  
58  
59  
60

1  
2  
3  
4 33. Gupta BP, Murad MH, Clifton MM, Prokop L, Nehra A, Kopecky SL. The effect of lifestyle  
5 modification and cardiovascular risk factor reduction on erectile dysfunction: a systematic review  
6 and meta-analysis. *Arch Intern Med* 2011; Nov 14;171(20):1797-803.  
7  
8

9  
10  
11 34. Maio G, Saraeb S, Marchiori A. Physical activity and PDE5 inhibitors in the treatment of  
12 erectile dysfunction: results of a randomized controlled study. *J Sex Med* 2010; Jun;7(6):2201-8.  
13  
14

15  
16  
17 35. Roviario R, Holmes D, Holmsten R. Influence of a Cardiac Rehabilitation Program on the  
18 Cardiovascular, Psychological, and Social Functioning of Cardiac Patients. *J Beh Med*  
19  
20 1984;7(1):61.  
21  
22

23  
24  
25 36. Froelicher ES, Kee LL, Newton KM, Lindskog B, Livingston M. Return to work, sexual  
26 activity, and other activities after acute myocardial infarction. *Heart Lung* 1994; Sep-  
27  
28 Oct;23(5):423-35.  
29  
30

31  
32  
33 37. Belardinelli R, Lacalaprince F, Faccenda E, Purcaro A, Perna G. Effects of short-term moderate  
34 exercise training on sexual function in male patients with chronic stable heart failure. *Int J Cardiol*  
35  
36 2005; May 11;101(1):83-90.  
37  
38

39  
40  
41 38. Bertie J, King A, Reed N, Marshall AJ, Ricketts C. Benefits and weaknesses of a cardiac  
42 rehabilitation programme. *J R Coll Physicians Lond* 1992; Apr;26(2):147-51.  
43  
44

45  
46 39. Lidell E, Fridlund B. Long-term effects of a comprehensive rehabilitation programme after  
47 myocardial infarction. *Scand J Caring Sci* 1996;10(2):67-74.  
48  
49

50  
51  
52 40. Klein R, Bar-on E, Klein J, Benbenishty R. The impact of sexual therapy on patients after  
53 cardiac events participating in a cardiac rehabilitation program. *Eur J Cardiovasc Prev Rehabil*  
54  
55 2007; Oct;14(5):672-8.  
56  
57  
58  
59  
60

- 1  
2  
3  
4 41. Dorey G, Speakman MJ, Feneley RC, Swinkels A, Dunn CD. Pelvic floor exercises for erectile  
5 dysfunction. *BJU Int* 2005; Sep;96(4):595-7.  
6  
7  
8  
9  
10 42. Van Kampen M, De Weerd W, Claes H, Feys H, De Maeyer M, Van Poppel H. Treatment of  
11 erectile dysfunction by perineal exercise, electromyographic biofeedback, and electrical stimulation.  
12  
13 *Phys Ther* 2003; Jun;83(6):536-43.  
14  
15  
16  
17 43. Balady GJ, Williams MA, Ades PA, Bittner V, Comoss P, Foody JA, et al. Core components of  
18 cardiac rehabilitation/secondary prevention programs: 2007 update: a scientific statement from the  
19 American Heart Association Exercise, Cardiac Rehabilitation, and Prevention Committee, the  
20 Council on Clinical Cardiology; the Councils on Cardiovascular Nursing, Epidemiology and  
21 Prevention, and Nutrition, Physical Activity, and Metabolism; and the American Association of  
22 Cardiovascular and Pulmonary Rehabilitation. *J Cardiopulm Rehabil Prev* 2007; May-  
23 Jun;27(3):121-9.  
24  
25  
26  
27  
28  
29  
30  
31  
32  
33  
34 44. Fitchet A, Doherty PJ, Bundy C, Bell W, Fitzpatrick AP, Garratt CJ. Comprehensive cardiac  
35 rehabilitation programme for implantable cardioverter-defibrillator patients: a randomised  
36 controlled trial. *Heart* 2003; Feb;89(2):155-60.  
37  
38  
39  
40  
41  
42 45. Rosen RC, Riley A, Wagner G, Osterloh IH, Kirkpatrick J, Mishra A. The international index of  
43 erectile function (IIEF): a multidimensional scale for assessment of erectile dysfunction. *Urology*  
44 1997; Jun;49(6):822-30.  
45  
46  
47  
48  
49  
50 46. Rosen RC, Cappelleri JC, Gendrano N,3rd. The International Index of Erectile Function (IIEF):  
51 a state-of-the-science review. *Int J Impot Res* 2002; Aug;14(4):226-44.  
52  
53  
54  
55  
56  
57  
58  
59  
60

- 1  
2  
3  
4 47. Derogatis LR. The psychosocial adjustment to illness scale (PAIS). *J Psychosom Res*  
5  
6 1986;30(1):77-91.  
7  
8  
9  
10 48. Westlake C, Dracup K, Walden JA, Fonarow G. Sexuality of patients with advanced heart  
11 failure and their spouses or partners. *J Heart Lung Transplant* 1999; Nov;18(11):1133-8.  
12  
13  
14  
15 49. Jaarsma T. Sexual problems in heart failure patients. *Eur J Cardiovasc Nurs* 2002; Feb;1(1):61-  
16  
17 7.  
18  
19  
20  
21 50. Rasmussen TB, Zwisler AD, Sibilitz KL, Risom SS, Bundgaard H, Glud C, et al. A  
22 randomised clinical trial of comprehensive cardiac rehabilitation versus usual care for patients  
23 treated for infective endocarditis--the CopenHeartIE trial protocol. *BMJ Open* 2012; Nov  
24  
25 21;2(6):10.1136/bmjopen,2012-001929. Print 2012.  
26  
27  
28  
29  
30  
31 51. Risom SS, Zwisler AD, Rasmussen TB, Sibilitz KL, Svendsen JH, Glud C, et al. The effect of  
32 integrated cardiac rehabilitation versus treatment as usual for atrial fibrillation patients treated with  
33 ablation: the randomised CopenHeartRFA trial protocol. *BMJ Open* 2013; Feb  
34  
35 20;3(2):10.1136/bmjopen,2012-002377. Print 2013.  
36  
37  
38  
39  
40  
41 52. Sibilitz KL, Berg SK, Hansen TB, Risom SS, Rasmussen TB, Hassager C, et al. Effect of  
42 comprehensive cardiac rehabilitation after heart valve surgery (CopenHeartVR): study protocol for  
43 a randomised clinical trial. *Trials* 2013; Apr 22;14(1):104.  
44  
45  
46  
47  
48  
49 53. Nehra A, Jackson G, Miner M, Billups KL, Burnett AL, Buvat J, et al. The Princeton III  
50 Consensus recommendations for the management of erectile dysfunction and cardiovascular  
51 disease. *Mayo Clin Proc* 2012; Aug;87(8):766-78.  
52  
53  
54  
55  
56  
57  
58  
59  
60

1  
2  
3  
4 54. Perk J, De Backer G, Gohlke H, Graham I, Reiner Z, Verschuren WM, et al. European  
5  
6 guidelines on cardiovascular disease prevention in clinical practice (version 2012) : the fifth joint  
7  
8 task force of the European society of cardiology and other societies on cardiovascular disease  
9  
10 prevention in clinical practice (constituted by representatives of nine societies and by invited  
11  
12 experts). *Int J Behav Med* 2012; Dec;19(4):403-88.

13  
14  
15  
16 55. Piepoli MF, Corra U, Benzer W, Bjarnason-Wehrens B, Dendale P, Gaita D, et al. Secondary  
17  
18 prevention through cardiac rehabilitation: from knowledge to implementation. A position paper  
19  
20 from the Cardiac Rehabilitation Section of the European Association of Cardiovascular Prevention  
21  
22 and Rehabilitation. *Eur J Cardiovasc Prev Rehabil* 2010; Feb;17(1):1-17.

23  
24  
25  
26 56. Berg SK. *Comprehensive rehabilitation for patients with ICD: PhD dissertation*. [Aarhus]:  
27  
28 Faculty of Health Sciences, Aarhus University; 2011.

29  
30  
31  
32 57. Zwisler AD, Soja AM, Rasmussen S, Frederiksen M, Abedini S, Appel J, et al. Hospital-based  
33  
34 comprehensive cardiac rehabilitation versus usual care among patients with congestive heart failure,  
35  
36 ischemic heart disease, or high risk of ischemic heart disease: 12-month results of a randomized  
37  
38 clinical trial. *Am Heart J* 2008; Jun;155(6):1106-13.

39  
40  
41  
42 58. Ashworth NL, Chad KE, Harrison EL, Reeder BA, Marshall SC. Home versus center based  
43  
44 physical activity programs in older adults. *Cochrane Database Syst Rev* 2005; Jan  
45  
46 25;(1)(1):CD004017.

47  
48  
49  
50 59. Oerkild B, Frederiksen M, Hansen JF, Simonsen L, Skovgaard LT, Prescott E. Home-based  
51  
52 cardiac rehabilitation is as effective as centre-based cardiac rehabilitation among elderly with  
53  
54 coronary heart disease: results from a randomised clinical trial. *Age Ageing* 2011; Jan;40(1):78-85.

- 1  
2  
3  
4 60. Borg GA. Psychophysical bases of perceived exertion. *Med Sci Sports Exerc* 1982;14(5):377-  
5  
6 81.  
7  
8  
9  
10 61. Williams MA, Haskell WL, Ades PA, Amsterdam EA, Bittner V, Franklin BA, et al. Resistance  
11  
12 exercise in individuals with and without cardiovascular disease: 2007 update: a scientific statement  
13  
14 from the American Heart Association Council on Clinical Cardiology and Council on Nutrition,  
15  
16 Physical Activity, and Metabolism. *Circulation* 2007; Jul 31;116(5):572-84.  
17  
18  
19 62. Lampman RM, Knight BP. Prescribing exercise training for patients with defibrillators. *Am J*  
20  
21 *Phys Med Rehabil* 2000; May-Jun;79(3):292-7.  
22  
23  
24 63. Dorey G, Glazener C, Buckley B, Cochran C, Moore K. Developing a pelvic floor muscle  
25  
26 training regimen for use in a trial intervention. *Physiotherapy* 2009; Sep;95(3):199-209.  
27  
28  
29  
30 64. Parse RR. *The human becoming school of thought: a perspective for nurses and other health*  
31  
32 *professionals*. Thousand Oaks, Calif.: Sage; 1998.  
33  
34  
35  
36 65. Tibaek S, Klarskov P, Lund Hansen B, Thomsen H, Andresen H, Schmidt Jensen C, et al.  
37  
38 Pelvic floor muscle training before transurethral resection of the prostate: a randomized, controlled,  
39  
40 blinded study. *Scand J Urol Nephrol* 2007;41(4):329-34.  
41  
42  
43  
44 66. Schüssler B. *Pelvic floor re-education: principles and practice*. London: Springer; 1994.  
45  
46  
47  
48 67. Mezzani A, Agostoni P, Cohen-Solal A, Corra U, Jegier A, Kouidi E, et al. Standards for the  
49  
50 use of cardiopulmonary exercise testing for the functional evaluation of cardiac patients: a report  
51  
52 from the Exercise Physiology Section of the European Association for Cardiovascular Prevention  
53  
54 and Rehabilitation. *Eur J Cardiovasc Prev Rehabil* 2009; Jun;16(3):249-67.  
55  
56  
57  
58  
59  
60

- 1  
2  
3  
4 68. Ware JE, Kosinski M, Gandek B. SF-36 Health Survey.: Manual and Interpretation guide  
5  
6 2005;The Health Institute, New England Medical Center, Boston, Massachussetts.  
7  
8  
9  
10 69. Zigmond AS, Snaith RP. The hospital anxiety and depression scale. *Acta Psychiatr Scand* 1983;  
11  
12 Jun;67(6):361-70.  
13  
14  
15 70. Drummond MF. *Methods for the economic evaluation of health care programmes*. 3rd edition  
16  
17 ed. Oxford: Oxford University Press; 2005.  
18  
19  
20  
21 71. Rubio-Aurioles E, Sand M, Terrein-Roccatti N, Dean J, Longworth J, Eardley I, et al. Female  
22  
23 Assessment of Male Erectile dysfunction detection scale (FAME): development and validation. *J*  
24  
25 *Sex Med* 2009; Aug;6(8):2255-70.  
26  
27  
28  
29 72. Boutron I, Moher D, Altman DG, Schulz KF, Ravaud P, CONSORT Group. Extending the  
30  
31 CONSORT statement to randomized trials of nonpharmacologic treatment: explanation and  
32  
33 elaboration. *Ann Intern Med* 2008; Feb 19;148(4):295-309.  
34  
35  
36  
37 73. Fletcher GF, Balady GJ, Amsterdam EA, Chaitman B, Eckel R, Fleg J, et al. Exercise standards  
38  
39 for testing and training: a statement for healthcare professionals from the American Heart  
40  
41 Association. *Circulation* 2001; Oct 2;104(14):1694-740.  
42  
43  
44 74. Jugdutt BI, Michorowski BL, Kappagoda CT. Exercise training after anterior Q wave  
45  
46 myocardial infarction: importance of regional left ventricular function and topography. *J Am Coll*  
47  
48 *Cardiol* 1988; Aug;12(2):362-72.  
49  
50  
51  
52 75. Giannuzzi P, Tavazzi L, Temporelli PL, Corra U, Imparato A, Gattone M, et al. Long-term  
53  
54 physical training and left ventricular remodeling after anterior myocardial infarction: results of the  
55  
56  
57  
58  
59  
60

1  
2  
3  
4 Exercise in Anterior Myocardial Infarction (EAMI) trial. EAMI Study Group. *J Am Coll Cardiol*  
5  
6 1993; Dec;22(7):1821-9.  
7  
8

9  
10 76. Otsuka Y, Takaki H, Okano Y, Satoh T, Aihara N, Matsumoto T, et al. Exercise training  
11 without ventricular remodeling in patients with moderate to severe left ventricular dysfunction early  
12 after acute myocardial infarction. *Int J Cardiol* 2003; Feb;87(2-3):237-44.  
13  
14

15  
16  
17 77. Pavy B, Iliou MC, Meurin P, Tabet JY, Corone S, Functional Evaluation and Cardiac  
18 Rehabilitation Working Group of the French Society of Cardiology. Safety of exercise training for  
19 cardiac patients: results of the French registry of complications during cardiac rehabilitation. *Arch*  
20  
21  
22  
23  
24  
25  
26  
27  
28  
29  
30  
31  
32  
33  
34  
35  
36  
37  
38  
39  
40  
41  
42  
43  
44  
45  
46  
47  
48  
49  
50  
51  
52  
53  
54  
55  
56  
57  
58  
59  
60

*Intern Med* 2006; Nov 27;166(21):2329-34.

78. Savovic J, Jones HE, Altman DG, Harris RJ, Juni P, Pildal J, et al. Influence of reported study  
design characteristics on intervention effect estimates from randomized, controlled trials. *Ann*  
*Intern Med* 2012; Sep 18;157(6):429-38.

79. Wood L, Egger M, Gluud LL, Schulz KF, Juni P, Altman DG, et al. Empirical evidence of bias  
in treatment effect estimates in controlled trials with different interventions and outcomes: meta-  
epidemiological study. *BMJ* 2008; Mar 15;336(7644):601-5.

80. Chan AW, Tetzlaff JM, Altman DG, Laupacis A, Gotzsche PC, Krleza-Jeric K, et al. SPIRIT  
2013 Statement: Defining Standard Protocol Items for Clinical Trials. *Ann Intern Med* 2013; Feb  
5;158(3):200-7.



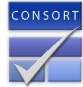

## CONSORT 2010 checklist of information to include when reporting a randomised trial\*

| Section/Topic                    | Item No | Checklist item                                                                                                                                                                              | Reported on page No |
|----------------------------------|---------|---------------------------------------------------------------------------------------------------------------------------------------------------------------------------------------------|---------------------|
| <b>Title and abstract</b>        |         |                                                                                                                                                                                             |                     |
|                                  | 1a      | Identification as a randomised trial in the title                                                                                                                                           | 1                   |
|                                  | 1b      | Structured summary of trial design, methods, results, and conclusions (for specific guidance see CONSORT for abstracts)                                                                     | 3                   |
| <b>Introduction</b>              |         |                                                                                                                                                                                             |                     |
| Background and objectives        | 2a      | Scientific background and explanation of rationale                                                                                                                                          | 4-5                 |
|                                  | 2b      | Specific objectives or hypotheses                                                                                                                                                           | 6                   |
| <b>Methods</b>                   |         |                                                                                                                                                                                             |                     |
| Trial design                     | 3a      | Description of trial design (such as parallel, factorial) including allocation ratio                                                                                                        | 6                   |
|                                  | 3b      | Important changes to methods after trial commencement (such as eligibility criteria), with reasons                                                                                          | NA                  |
| Participants                     | 4a      | Eligibility criteria for participants                                                                                                                                                       | 7                   |
|                                  | 4b      | Settings and locations where the data were collected                                                                                                                                        | 8,10                |
| Interventions                    | 5       | The interventions for each group with sufficient details to allow replication, including how and when they were actually administered                                                       | 7-11                |
| Outcomes                         | 6a      | Completely defined pre-specified primary and secondary outcome measures, including how and when they were assessed                                                                          | 11-13               |
|                                  | 6b      | Any changes to trial outcomes after the trial commenced, with reasons                                                                                                                       | NA                  |
| Sample size                      | 7a      | How sample size was determined                                                                                                                                                              | 11-12               |
|                                  | 7b      | When applicable, explanation of any interim analyses and stopping guidelines                                                                                                                | 17                  |
| <b>Randomisation:</b>            |         |                                                                                                                                                                                             |                     |
| Sequence generation              | 8a      | Method used to generate the random allocation sequence                                                                                                                                      | 14                  |
|                                  | 8b      | Type of randomisation; details of any restriction (such as blocking and block size)                                                                                                         | 14                  |
| Allocation concealment mechanism | 9       | Mechanism used to implement the random allocation sequence (such as sequentially numbered containers), describing any steps taken to conceal the sequence until interventions were assigned | 14                  |
| Implementation                   | 10      | Who generated the random allocation sequence, who enrolled participants, and who assigned participants to interventions                                                                     | 14                  |
| Blinding                         | 11a     | If done, who was blinded after assignment to interventions (for example, participants, care providers, those                                                                                | 6                   |

|    |                          |                                                                                                                     |                |
|----|--------------------------|---------------------------------------------------------------------------------------------------------------------|----------------|
| 1  |                          |                                                                                                                     |                |
| 2  |                          | assessing outcomes) and how                                                                                         |                |
| 3  |                          |                                                                                                                     |                |
| 4  |                          | 11b If relevant, description of the similarity of interventions                                                     | NA             |
| 5  | Statistical methods      | 12a Statistical methods used to compare groups for primary and secondary outcomes                                   | 15             |
| 6  |                          | 12b Methods for additional analyses, such as subgroup analyses and adjusted analyses                                | 16             |
| 7  |                          |                                                                                                                     |                |
| 8  | <b>Results</b>           |                                                                                                                     |                |
| 9  | Participant flow (a      | 13a For each group, the numbers of participants who were randomly assigned, received intended treatment, and        | NA             |
| 10 | diagram is strongly      | were analysed for the primary outcome                                                                               |                |
| 11 | recommended)             | 13b For each group, losses and exclusions after randomisation, together with reasons                                | NA             |
| 12 | Recruitment              | 14a Dates defining the periods of recruitment and follow-up                                                         | NA             |
| 13 |                          | 14b Why the trial ended or was stopped                                                                              | NA             |
| 14 | Baseline data            | 15 A table showing baseline demographic and clinical characteristics for each group                                 | NA             |
| 15 | Numbers analysed         | 16 For each group, number of participants (denominator) included in each analysis and whether the analysis was      | NA             |
| 16 |                          | by original assigned groups                                                                                         |                |
| 17 | Outcomes and             | 17a For each primary and secondary outcome, results for each group, and the estimated effect size and its           | NA             |
| 18 | estimation               | precision (such as 95% confidence interval)                                                                         |                |
| 19 |                          | 17b For binary outcomes, presentation of both absolute and relative effect sizes is recommended                     | NA             |
| 20 | Ancillary analyses       | 18 Results of any other analyses performed, including subgroup analyses and adjusted analyses, distinguishing       | NA             |
| 21 |                          | pre-specified from exploratory                                                                                      |                |
| 22 | Harms                    | 19 All important harms or unintended effects in each group (for specific guidance see CONSORT for harms)            | NA             |
| 23 |                          |                                                                                                                     |                |
| 24 | <b>Discussion</b>        |                                                                                                                     |                |
| 25 | Limitations              | 20 Trial limitations, addressing sources of potential bias, imprecision, and, if relevant, multiplicity of analyses | NA             |
| 26 |                          | 21 Generalisability (external validity, applicability) of the trial findings                                        | NA             |
| 27 | Interpretation           | 22 Interpretation consistent with results, balancing benefits and harms, and considering other relevant evidence    | NA             |
| 28 |                          |                                                                                                                     |                |
| 29 | <b>Other information</b> |                                                                                                                     |                |
| 30 | Registration             | 23 Registration number and name of trial registry                                                                   | 16             |
| 31 | Protocol                 | 24 Where the full trial protocol can be accessed, if available                                                      | 18             |
| 32 | Funding                  | 25 Sources of funding and other support (such as supply of drugs), role of funders                                  | In the article |
| 33 |                          |                                                                                                                     | registration,  |
| 34 |                          |                                                                                                                     | which will be  |
| 35 |                          |                                                                                                                     | published      |
| 36 |                          |                                                                                                                     |                |
| 37 |                          |                                                                                                                     |                |
| 38 |                          |                                                                                                                     |                |
| 39 |                          |                                                                                                                     |                |
| 40 |                          |                                                                                                                     |                |
| 41 |                          |                                                                                                                     |                |
| 42 |                          |                                                                                                                     |                |
| 43 |                          |                                                                                                                     |                |
| 44 | CONSORT 2010 checklist   |                                                                                                                     |                |
| 45 |                          |                                                                                                                     |                |
| 46 |                          |                                                                                                                     |                |
| 47 |                          |                                                                                                                     |                |
| 48 |                          |                                                                                                                     |                |
| 49 |                          |                                                                                                                     |                |

1  
2 \*We strongly recommend reading this statement in conjunction with the CONSORT 2010 Explanation and Elaboration for important clarifications on all the items. If relevant, we also  
3 recommend reading CONSORT extensions for cluster randomised trials, non-inferiority and equivalence trials, non-pharmacological treatments, herbal interventions, and pragmatic trials.  
4 Additional extensions are forthcoming: for those and for up to date references relevant to this checklist, see [www.consort-statement.org](http://www.consort-statement.org).  
5  
6  
7  
8  
9  
10  
11  
12  
13  
14  
15  
16  
17  
18  
19  
20  
21  
22  
23  
24  
25  
26  
27  
28  
29  
30  
31  
32  
33  
34  
35  
36  
37  
38  
39  
40  
41  
42  
43  
44  
45  
46  
47  
48  
49

For peer review only



**The CopenHeartSF trial; Comprehensive sexual rehabilitation programme for male patients with implantable cardioverter defibrillator or ischaemic heart disease and impaired sexual function: protocol of a randomised clinical trial.**

|                                 |                                                                                                                                                                                                                                                                                                                                                                                                                                                                                                                                                                                                                                                                                                                                                                                                                                                                                                                                                                                                                                                                                                                                                                                                    |
|---------------------------------|----------------------------------------------------------------------------------------------------------------------------------------------------------------------------------------------------------------------------------------------------------------------------------------------------------------------------------------------------------------------------------------------------------------------------------------------------------------------------------------------------------------------------------------------------------------------------------------------------------------------------------------------------------------------------------------------------------------------------------------------------------------------------------------------------------------------------------------------------------------------------------------------------------------------------------------------------------------------------------------------------------------------------------------------------------------------------------------------------------------------------------------------------------------------------------------------------|
| Journal:                        | <i>BMJ Open</i>                                                                                                                                                                                                                                                                                                                                                                                                                                                                                                                                                                                                                                                                                                                                                                                                                                                                                                                                                                                                                                                                                                                                                                                    |
| Manuscript ID:                  | bmjopen-2013-003967.R1                                                                                                                                                                                                                                                                                                                                                                                                                                                                                                                                                                                                                                                                                                                                                                                                                                                                                                                                                                                                                                                                                                                                                                             |
| Article Type:                   | Protocol                                                                                                                                                                                                                                                                                                                                                                                                                                                                                                                                                                                                                                                                                                                                                                                                                                                                                                                                                                                                                                                                                                                                                                                           |
| Date Submitted by the Author:   | 09-Oct-2013                                                                                                                                                                                                                                                                                                                                                                                                                                                                                                                                                                                                                                                                                                                                                                                                                                                                                                                                                                                                                                                                                                                                                                                        |
| Complete List of Authors:       | Johansen, Pernille; Copenhagen University Hospital Bispebjerg, Department of Cardiology; Copenhagen University Hospital, Rigshospitalet, The Heart Centre<br>Zwisler, Ann-Dorthe; Copenhagen University Hospital, Rigshospitalet, The Heart Centre<br>Svendsen, Jesper; Copenhagen University Hospital Rigshospitalet, The Heart Centre<br>Frederiksen, Marianne; Copenhagen University Hospital Bispebjerg, Department of Cardiology<br>Lindschou, Jane; Copenhagen University Hospital Rigshospitalet, The Copenhagen Trial Unit, Centre for Clinical Intervention Research<br>Winkel, Per; Copenhagen University Hospital Rigshospitalet, The Copenhagen Trial Unit, Centre for Clinical Intervention Research<br>Gluud, Christian; Copenhagen University Hospital Rigshospitalet, The Copenhagen Trial Unit, Centre for Clinical Intervention Research<br>Giraldi, Annamaria; Copenhagen University Hospital Rigshospitalet, Sexological Clinic, Psychiatric Center Copenhagen<br>Steinke, Elaine; Wichita State University,<br>Jaarsma, Tiny; Linköping University, Department of Social and Welfare Studies<br>Berg, Selina; Copenhagen University Hospital Rigshospitalet, The Heart Centre |
| <b>Primary Subject Heading</b>: | Rehabilitation medicine                                                                                                                                                                                                                                                                                                                                                                                                                                                                                                                                                                                                                                                                                                                                                                                                                                                                                                                                                                                                                                                                                                                                                                            |
| Secondary Subject Heading:      | Sexual health, Nursing, Cardiovascular medicine                                                                                                                                                                                                                                                                                                                                                                                                                                                                                                                                                                                                                                                                                                                                                                                                                                                                                                                                                                                                                                                                                                                                                    |
| Keywords:                       | CARDIOLOGY, REHABILITATION MEDICINE, SEXUAL MEDICINE                                                                                                                                                                                                                                                                                                                                                                                                                                                                                                                                                                                                                                                                                                                                                                                                                                                                                                                                                                                                                                                                                                                                               |
|                                 |                                                                                                                                                                                                                                                                                                                                                                                                                                                                                                                                                                                                                                                                                                                                                                                                                                                                                                                                                                                                                                                                                                                                                                                                    |

**The CopenHeartSF trial; Comprehensive sexual rehabilitation programme for male patients with implantable cardioverter defibrillator or ischaemic heart disease and impaired sexual function: protocol of a randomised clinical trial.**

**Pernille Palm Johansen<sup>1+2</sup>**

**Ann-Dorthe Zwisler<sup>2+3</sup>**

**Jesper Hastrup-Svendsen<sup>2+8</sup>**

**Marianne Fredriksen<sup>1</sup>**

**Jane Lindschou<sup>4</sup>**

**Per Winkel<sup>4</sup>**

**Christian Gluud<sup>4</sup>**

**Annamaria Giraldi<sup>5</sup>**

**Elaine Steinke<sup>6</sup>**

**Tiny Jaarsma<sup>7</sup>**

**Selina Kikkenborg Berg<sup>2</sup>**

<sup>1</sup>Department of Cardiology, Copenhagen University Hospital, Bispebjerg Hospital, Copenhagen, Denmark

<sup>2</sup>The Heart Centre, Copenhagen University Hospital, Rigshospitalet, Copenhagen, Denmark

<sup>3</sup>National Institute of Public Health, University of Southern Denmark

<sup>4</sup>The Copenhagen Trial Unit, Centre for Clinical Intervention Research, Rigshospitalet, Copenhagen University Hospital, Copenhagen, Denmark

<sup>5</sup>Sexological Clinic, Psychiatric Center Copenhagen, Copenhagen University Hospital, Rigshospitalet, Copenhagen, Denmark

<sup>6</sup>Wichita State University, Wichita, Kansas, United States

<sup>7</sup>Department of Social and Welfare Studies, Linköping University, Linköping, Sweden

<sup>8</sup>Institute of Clinical Medicine, Faculty of Health Science, University of Copenhagen

Date: October 7. 2013. Version 1.2

**Corresponding author:**

Pernille Palm Johansen RN. MCN

Copenhagen University Hospital, Bispebjerg Hospital / Rigshospitalet

Copenhagen

Denmark

Mail: [pernille.palm.johansen@regionh.dk](mailto:pernille.palm.johansen@regionh.dk)

For peer review only

**ABSTRACT**

**Introduction:** Sexuality is an important part of people's physical and mental health. Patients with heart disease often suffer from sexual dysfunction. Sexual dysfunction has a negative impact on quality of life and well-being in persons with heart disease, and sexual dysfunction is associated with anxiety and depression. Treatment and care possibilities seem to be lacking. Studies indicate that non-pharmacological interventions such as exercise training and psycho-education possess the potential of reducing sexual dysfunction in patients with heart disease. The CopenHeart<sub>SF</sub> trial will investigate the effect of a comprehensive sexual rehabilitation programme versus usual care.

**Methods and analysis:** CopenHeart<sub>SF</sub> is an investigator-initiated randomised clinical superiority trial with blinded outcome assessment, with 1:1 central randomisation to sexual rehabilitation plus usual care versus usual care alone. Based on sample size calculations, 154 male patients with impaired sexual function due to implantable cardioverter defibrillator or ischaemic heart disease will be included from two university hospitals in Denmark. All patients receive usual care and patients allocated to the experimental intervention group follow a 12 week sexual rehabilitation programme consisting of an individualised exercise program and psycho-educative consultation with a special trained nurse. The primary outcome is sexual function measured by the International Index of Erectile Function. The secondary outcome measure is psycho-social adjustment to illness by the Psychosocial Adjustment to Illness Scale, sexual domain. A number of explorative analyses will also be conducted.

**Ethics and dissemination:** CopenHeart<sub>SF</sub> is approved by the regional ethics committee (no H-4-2012-168) and the Danish Data Protection Agency (no 2007-58-0015) and is performed in accordance with good clinical practice and the Declaration of Helsinki in its latest form.

**Registration:** Clinicaltrials.gov identifier: NCT01796353

## ARTICLE SUMMARY

### Article focus

- The CopenHeart<sub>SF</sub> is a randomised clinical trial investigating the effects of a comprehensive sexual rehabilitation programme versus usual care for patients with sexual dysfunction and implantable cardioverter defibrillator or ischaemic heart disease.
- The hypothesis is, that comprehensive sexual rehabilitation consisting of a psycho-educational component and a physical exercise component including pelvic floor exercise improves sexual function.

### Key messages

- Sexual dysfunction is highly prevalent in cardiovascular patients and a systematic approach seems to be lacking.
- This trial is the first to study the effect of a comprehensive sexual rehabilitation programme in a cardiac population.
- This trial is the first to include pelvic floor exercise in a comprehensive rehabilitation programme in cardiac patients.

### Strengths and limitation of this study

- The study have been designed to meet the criteria for high quality in non-pharmacological randomised clinical with central randomisation, multicentre participation, and blinded assessment and analysis.
- We are aware of the subjective nature of the self-reported primary outcome (International Index of Erectile Function). Accordingly, we will interpret data conservatively.



## BACKGROUND

Sexuality is an important part of people's physical and mental health.<sup>1, 2</sup> Patients with cardiovascular disease have increased prevalence of sexual dysfunction.<sup>3-5</sup> The causes of sexual dysfunction can be related to physical changes due to the disease, mental changes, or adverse reactions to drugs and other interventions.<sup>6, 7</sup> Male sexual dysfunction is divided into sexual interest/desire disorders, ejaculation and orgasmic dysfunctions and erectile dysfunction.<sup>8</sup> The most common disorder is erectile dysfunction, defined as the persistent inability to obtain or maintain an erection which enables satisfying sexual activity.<sup>9</sup> Erectile dysfunction is associated with age, but can also be triggered by both organic and psychogenic conditions and is often related to vascular disease such as diabetes, hypertension, and heart disease.<sup>10</sup> Studies including 33,451 males estimate that erectile dysfunction in varying degrees exists in 52% of all men, and that age is the most common variable associated with erectile dysfunction.<sup>3-5</sup> The probability of complete erectile dysfunction in cardiovascular patients is 39% compared to 10% in the total population when adjusting for age.<sup>3, 4</sup> Physical activity is positively associated with a lower incidence of erectile dysfunction.<sup>5</sup> The prevalence of sexual dysfunction in patients with heart disease ranges from 15% up to 89%.<sup>1, 11-17</sup> Patients with ischaemic heart disease and patients with implantable cardioverter defibrillator, which are two large and growing patient populations, are especially affected.<sup>11, 16, 18-20</sup> Sexual dysfunction has a negative impact on quality of life and well-being in men with cardiovascular disease, and sexual dysfunction is associated with an increase in anxiety and depression.<sup>21-24</sup> The relationship is perceived to be bi-directional, with one element forcing the other.<sup>25, 26</sup>

### Standard treatment

Despite the fact that several international guidelines recommend that health professionals address the topic sexuality in patients with heart disease,<sup>27, 28</sup> this is rarely done in practice.<sup>29, 30</sup> The consensus or practice on how or where patients with heart disease and sexual dysfunction should be treated is lacking, however, some guidelines about prescription of phosphodiesterase5 (PDE5) inhibitors exist.<sup>6</sup> The PDE5 inhibitors have an overall success rate of 50% to 80% of those treated in patients with cardiovascular disease.<sup>6, 31, 32</sup> PDE5 inhibitors are generally safe. Linking PDE5 inhibitors to cardiac events, large randomised trials and a meta-analysis suggest that they are not associated with an increase in myocardial infarction or cardiac events.<sup>6, 32</sup> In patients with heart disease and no effect of PDE5 inhibitors, or where PDE5 inhibitors are contra-indicated because of

1  
2  
3  
4 treatment with nitrates, there seems to be no consensus on what treatment should be offered for  
5 sexual dysfunction.  
6  
7

### 8 9 **Non-pharmacological treatment potentials**

10 Non-pharmacological interventions possess potential in reducing sexual dysfunction. Lifestyle  
11 factors such as; cigarette smoking, hyperlipidaemia, and a sedentary lifestyle all predict erectile  
12 dysfunction<sup>4, 5</sup> and these are the same risk factors that predict coronary artery disease. A recent  
13 meta-analysis of six randomised trials with 740 patients with no known heart disease, showed that  
14 life style modifications such as physical exercise and pharmacotherapy for cardiovascular risk  
15 factors were associated with a significant improvement in erectile function.<sup>33</sup> Furthermore, a  
16 randomised trial investigating the effect of exercise training 3 hours per week or more in non-heart  
17 disease patients showed a significant result in improving the person's erectile functioning compared  
18 with controls with no exercise training.<sup>34</sup> We hypothesize that these lifestyle modifications can also  
19 improve sexual dysfunction in patients with already established heart disease. A systematic  
20 literature search showed five randomised clinical trials which examine the effect of physical  
21 exercise on sexual dysfunction.<sup>35-39</sup> Overall, 591 patients with heart disease were included and the  
22 effect was significant in three of the five trials.<sup>37-39</sup> However, the trials are characterised as being of  
23 small sample sizes, using non-validated tools and mainly focusing on the time before patients return  
24 to sexual activity and not on the ability and quality of the sexual performance. Randomised trials  
25 that address the psychological aspects of sexual dysfunction are limited in patients with heart  
26 disease. However, one randomised trial testing the effect of sexual therapy showed some promising  
27 trends when it comes to improving the frequency and quality of sexual activity in male patients post  
28 cardiac event beyond the usual cardiac rehabilitation.<sup>40</sup> However, due to the limited power of the  
29 sample in this trial, it did not allow the detection of significant effects. The role of pelvic floor  
30 exercises as a treatment of erectile dysfunction is not tested on patients with heart disease, but in the  
31 general population 40% to 47% had regained normal erectile function after 3-4 month of training  
32 the pelvic floor muscles.<sup>41, 42</sup> As the condition sexual dysfunction often includes both physical and  
33 psychological components, it is plausible to believe that patients with heart disease and sexual  
34 dysfunction benefit from a comprehensive rehabilitation intervention<sup>43, 44</sup> consisting of a psycho-  
35 educational component and an exercise training component including pelvic floor exercises.  
36  
37  
38  
39  
40  
41  
42  
43  
44  
45  
46  
47  
48  
49  
50  
51  
52  
53  
54  
55  
56  
57  
58  
59  
60

## TRIAL OBJECTIVES

The objective of the CopenHeart<sub>SF</sub> is to investigate benefit and harm on the sexual function of male patients with ischaemic heart disease or patients with implantable cardioverter defibrillator of a comprehensive sexual rehabilitation programme, consisting of a psycho-educative component and a physical exercise component, including pelvic floor exercises. The primary hypothesis is that, a comprehensive sexual rehabilitation programme improves sexual function, as assessed by the International Index of Erectile dysfunction (IIEF) questionnaire<sup>45, 46</sup>, in males with sexual dysfunction and ischaemic heart disease or patients with implantable cardioverter by 3.5 points in the experimental group compared with the control group after completion of the programme. The estimated increase in primary outcome is based on a study that examines the effect of a physical intervention in patients with cardiovascular disease taking PDE5-inhibitors.<sup>34</sup> The secondary hypothesis is that sexual function, measured by the sexual domain in the Psychosocial Adjustment to Illness Scale (self-reported version) (PAIS-SR) questionnaire<sup>47</sup>, improves by two points in the experimental group compared with the control group after completing the programme. The estimated increase in secondary outcome is based on two studies that examine the prevalence of sexual dysfunction in patients with heart failure.<sup>48, 49</sup>

Exploratory analyses will test the hypotheses that comprehensive sexual rehabilitation will improve: health-related quality of life, anxiety and depression, frequency of sexual activity, physical capacity measured by peak oxygen uptake (peak VO<sub>2</sub>), pelvic floor muscle strength and endurance and female assessment of male partner's erectile dysfunction.

## METHODS

CopenHeart<sub>SF</sub> is an investigator-initiated randomised clinical superiority trial with blinded outcome assessment, with 1:1 central randomisation to a comprehensive sexual rehabilitation programme plus usual care or usual care alone. Based on sample-size calculations 154 patients will be recruited from two university hospitals in Denmark. The CopenHeart<sub>SF</sub> trial is a part of the overall CopenHeart project, consisting of several randomised clinical trials ([www.CopenHeart.org](http://www.CopenHeart.org)), designed to develop evidence-based knowledge of rehabilitation among patients with complex cardiac conditions. Major parts of the CopenHeart<sub>SF</sub> methods section and trial design in this paper are similar to other randomised clinical trials, CopenHeart<sub>IE</sub><sup>50</sup>, CopenHeart<sub>RFA</sub><sup>51</sup> and CopenHeart<sub>VR</sub><sup>52</sup>.

### Study population and eligibility criteria

Male patients above 18 years with sexual dysfunction associated with implantable cardioverter defibrillator or with ischaemic heart disease verified by coronary angiography, who have a partner, speak and understand Danish, and provide a written informed consent, are considered eligible for participation. Exclusion criteria are patients at intermediate or high risk in relation to their cardiovascular status according to recommendations from the Princeton consensus group<sup>32, 53</sup>; those with diseases in the urinary tract; those who perform intense exercise more than 3 hours a week; patients with neurological or orthopaedic deficits which prevent training; patients with cognitive deficits which prevents consultations; and patients who are included in ongoing research prohibiting additional research participation. A diagram showing the flow of participants through each stage of the randomized trial will be made. (See figure 1)

### Experimental intervention

The experimental intervention is a comprehensive sexual rehabilitation programme. Sexual rehabilitation in this trial is defined as: a time-bounded planned process with clear goals and means. Sexual rehabilitation is a process where several actors, including the patient, are working towards regaining improved sexual functioning and coping ability according to their sexual function. The comprehensive sexual rehabilitation programme contains a physical exercise component, including training of the pelvic floor and a psycho-educational component.

### The physical components

#### *Physical exercise*

The goal of physical exercise is to achieve an improvement in the patient's physical work capacity, and to eliminate the fear and uncertainty the patient may feel in relation to sexual activity as a form of physical activity. The physical exercise intervention is based on The European Society of Cardiology recommendations for physical activity for cardiovascular patients.<sup>54</sup> The European Society of Cardiology recommends that all adults promote and maintain their fitness, muscle strength, flexibility and bone health several hours a week. Training must be of high intensity and of 30 minutes duration.<sup>54</sup> Furthermore, the intervention is supported by European recommendations for physical training in cardiac patients<sup>55</sup> and has been tested in COPE-ICD and DANREHAB trials.<sup>56, 57</sup> A professional physiotherapist with specific knowledge of cardiac rehabilitation initiates the physical exercise programme. Together with the patient, the physiotherapist plans and prepares

1  
2  
3  
4 a physical exercise protocol, taking into account the patient's clinical condition and physical  
5 abilities. Sixty minutes is allocated for the initial consultation and preparation of individual training  
6 protocol, including pelvic floor exercise instructions.  
7  
8

9  
10 Physical exercise is initiated at a physiotherapist-supervised setting at the Heart Centre,  
11 Rigshospitalet. Using wireless electrodes integrated into t-shirts (Corus-Fit, CardioCardio and  
12 Corus Exercise Assistant, version 2.0.16, Finland) potential cardiac arrhythmias,  
13 electrocardiographic abnormalities such as ST segment changes, T-wave alterations, atrial or  
14 ventricular arrhythmias, and training intensity level are monitored. The training is initiated with two  
15 to three mandatory exercise sessions at Rigshospitalet. Subsequently, the patients can choose to  
16 continue the intensive physical exercise regimen either at Rigshospitalet, or at a local CopenHeart-  
17 certified facility, supervised by physiotherapists, or as supervised home-based training. Supervised  
18 home-based physical training has previously shown similar results to hospital-based training.<sup>58</sup> This  
19 finding has been confirmed in a Danish setting.<sup>59</sup>  
20  
21

22  
23 One session is structured with 10 minutes (min) warm-up bicycling, 20 min bicycling with  
24 increased intensity (cardiovascular training), 20 min strength exercises, and 10 min stretching and  
25 cool-down period. The warm-up session is performed at the intensity of 11 to 12 on the Borg  
26 scale.<sup>60</sup> The 20 min cardiovascular training is performed as interval training. Each session is divided  
27 into three sections. Each section contains intensity 13 to 17 on the Borg scale and time limit (2 to 15  
28 min) varying between each section; the second section with longest and highest intensity. A cool  
29 down period of 5 min is included after the 20 min of cardiovascular training. The strength and  
30 strength-related exercises primarily target lower body muscles, and comprise the following four  
31 exercises: (1) heel rise performed by repetitions of maximal flexion from standing position; (2)  
32 step-up by using a step bench of 27 cm; (3) leg press standardised, starting with 90 degrees flexion,  
33 hyperextension not accepted; (4) 90 degrees pull-down performed in a cable machine to target  
34 abdominal muscles. For step-ups and heel-rises, weight load is calculated as a percentage of body  
35 weight (5 to 20%) and increased throughout the 12 weeks. Load for leg press is estimated from  
36 repetition maximum (RM) testing and increases from 60% of 1 RM to 70% of 1 RM during the 12  
37 weeks of training. All exercises are initiated by 2x12 repetitions and increased through the  
38 programme according to standard guidelines for strength training.<sup>61</sup>  
39  
40  
41  
42  
43  
44  
45  
46  
47  
48  
49  
50  
51  
52

53 To achieve cardiovascular adjustment the training begins with a warming-up period and ends with a  
54 cool-down period. This cardiovascular adjustment has been shown to reduce the risk of ischaemia  
55 and arrhythmia in connection to physical exercise.<sup>44, 62</sup> Participants must mainly exercise in an  
56  
57  
58  
59  
60

1  
2  
3  
4 upright position to decrease left ventricular filling pressure and risk of ischaemia or heart-failure-  
5 triggered ventricular arrhythmias.<sup>62</sup>  
6  
7

### 8 9 *Pelvic floor exercise*

10 The bulbocavernosus muscle and the ischiocavernosus muscle, two superficial pelvic floor muscles,  
11 are active during erection and enhance rigidity. The bulbocavernosus muscle encircles 33% to 50%  
12 of the base of the penis.<sup>41</sup> The pelvic floor training regimen is inspired by Dorey and colleagues,  
13 who have developed a training regimen for male patients for use in randomised clinical trials.<sup>63</sup> The  
14 regiment is developed and tested in a different patient population, and we have therefore modified it  
15 to fit cardiovascular patients. Patients are instructed in pelvic floor exercises by a skilled  
16 physiotherapist. Patients are instructed to perform their pelvic floor exercises twice daily. Studies  
17 showed that a few strong or maximum contractions are more effective when it comes to gaining  
18 muscle hypertrophy than several less strong contractions.<sup>63</sup> Patients are instructed to tighten their  
19 pelvic floor muscles as strongly as possible (as if to prevent flatus from escaping) three times when  
20 lying, three times when sitting, and three times when standing. The duration of the contraction is up  
21 to 10 seconds each, and patients are informed to have a 10 second break between each contraction.  
22 The physiotherapist instructs the patients on how to contract the bulbocavernosus and  
23 ischiocavernosus muscles. In order to ensure that the right muscles are involved, attention is placed  
24 on the ability to lift the scrotum and retract the penis. To obtain some degree of pelvic floor muscle  
25 endurance, the patients are encouraged to tighten the pelvic floor muscles when walking.  
26 To encourage adherence and monitor compliance pulse watches (Polar watch) with extended  
27 memory and exercise training logs are handed out. A training log contains information about  
28 physical exercise as well as pelvic floor exercise. At the end of the intervention the training log and  
29 the pulse watch are returned and compliance and intensity level are coded independently.  
30  
31  
32  
33  
34  
35  
36  
37  
38  
39  
40  
41  
42  
43  
44

### 45 46 **The psycho-educational components**

47 The goal of the psycho-educative intervention is that the patient learns to interpret and react to  
48 relevant physical and psychological symptoms, learns to cope with anxiety and fear, including  
49 strategies to manage depressive symptoms and ability to be sexually active without fear.  
50 A specially trained nurse is responsible for the psycho-educative intervention. The intervention  
51 takes a theoretical basis of the patient-centred approach where the emphasis is on support and  
52 education. The conversations are based on a holistic view of the patient and focus on the handling  
53  
54  
55  
56  
57  
58  
59  
60

1  
2  
3  
4 of life and managing sexual dysfunction. The intervention is targeted at the modifiable parameters  
5 that are reported to affect sexual dysfunction. The psycho-educative intervention is inspired by RR  
6 Parse's 'Human Becoming Practice Methodologies' three dimensions<sup>64</sup>, which can be described as:  
7 1. discuss and give meaning to the past, present and future, 2. explore and discuss events and  
8 opportunities; and 3. pursue imagined possibilities. According to this theory, there are three ways to  
9 alter its perceived health: creative ideas, see, hear and feel how a situation could be if it was lived in  
10 a different way; recognising personal patterns and value priorities and shed light on the paradoxes  
11 by looking at incongruence in a situation and change the view of reality. The nurse is 'truly present'  
12 in the process through discussion, quiet contemplation, and reflection. The psycho-educative  
13 intervention plus physical exercise was tested in the COPE-ICD trial, with positive effects on  
14 psychological well-being (mental health) and the general health sub-scale of the SF-36.<sup>56</sup> The nurse  
15 is trained in the psycho-educative conversation through teaching and supervision of nurses who  
16 have experience with the 'Human Becoming Practice Methodology' from the COPE-ICD trial. It is  
17 based on the theoretical literature that forms the basis for understanding the processes of practice  
18 methodology and existing specialty specific knowledge about heart disease, related symptoms, and  
19 sexology. The supervisor observes and provides feedback in relation to the methods and goals of the  
20 conversation. The emphasis is on openness in the interviews, and on the nurse's ability to: be  
21 silently present while the patient talks, ask questions that encourage reflection, let the patient find  
22 answers and solutions and contribute with knowledge, provide advice and guidance when requested  
23 and relevant. The training of the nurse takes place prior to the intervention. In practice the  
24 intervention will be handled by one nurse with several years of experience working with cardiac  
25 patients and trained in sexology. The sexology experience is gained in a two-week intensive course  
26 on basic and clinical sexology including training in sexual therapy. Supervision from a sexologist is  
27 available during the intervention. The nurse will conduct consultations with patients individually,  
28 and patients are informed that they are welcome to bring spouses/relatives. The consultation will  
29 take place in a quiet room in an outpatient settings and last for 45 minutes. An inspirational guide  
30 will form the basis for the consultations. The guide consists of several elements and issues (medical,  
31 psychosocial, educational and sexual) that work as inspiration (see table 1):  
32  
33  
34  
35  
36  
37  
38  
39  
40  
41  
42  
43  
44  
45  
46  
47  
48  
49  
50  
51  
52  
53  
54  
55  
56  
57  
58  
59  
60

**Table 1. Inspiration guide for psycho-educational consultations**

|                                                                                 |
|---------------------------------------------------------------------------------|
| A brief medical history                                                         |
| Actual thoughts and questions regarding their heart disease and sexual function |
| Sexual dysfunction                                                              |
| Safety issues                                                                   |
| Angina or ICD shock                                                             |
| How the sexual problems affect daily live                                       |
| Provide the patient with recommendations                                        |
| Relationship                                                                    |

### **Usual care**

Participants in the experimental group and in the control group will receive the usual care according to current guidelines. Usual care is, for patients for whom it is not contraindicated, treatment with PDE5 inhibitors. Patients who are candidates for PDE5 inhibitors are encouraged to contact their general practitioner in order to establish the treatment. Use of PDE5 inhibitors will be monitored in both intervention groups. To assess outcome measures, patients in the control group will be asked to complete questionnaires on equal terms with participants in the experimental group. In addition, they will be tested in the form of cardiopulmonary testing (peak VO<sub>2</sub>) and pelvic floor muscle strength and endurance at baseline and at the end of the trial.

### **Outcomes and data collection**

In order to evaluate the effect of comprehensive sexual rehabilitation programme numerous data will be collected.

#### *Primary outcome*

Sexual function will be measured by the International Index of Erectile Function (IIEF) questionnaire after 16 weeks and 6 months. International Index of Erectile Function (IIEF) was developed in conjunction with the clinical trial program for sildenafil, and has since been adopted as



1  
2  
3  
4 the 'gold standard' measure for efficacy assessment in clinical trials of erectile dysfunction. It has  
5 been linguistically validated in 32 languages including Danish and used as a primary outcome in  
6 more than 50 clinical trials.<sup>34, 45, 46</sup> It consists of 15 items including five domains of sexual function:  
7 erectile function, orgasmic function, sexual desire, intercourse satisfaction, and overall satisfaction.  
8 The IIEF meets psychometric criteria for test reliability and validity, and has a high degree of  
9 sensitivity and specificity.<sup>46</sup> The IIEF is self-assessed, which in sexological research is widely used  
10 and well acclaimed.

### 11 12 13 14 15 16 17 18 *Secondary outcome*

19  
20 Sexual function is measured by the Psychosocial Adjustment to Illness Scale (self-reported version)  
21 (PAIS-SR) sexual relationship domain.<sup>47</sup> The overall PAIS-SR measure psychosocial adjustment to  
22 illness in terms of 7 primary domains of adjustment: Health Care Orientation, Vocational  
23 Environment, Domestic Environment, Sexual Relationships, Extended Family Relationships, Social  
24 Environment and Psychological Distress. Each PAIS/PAIS-SR item is rated on a 4-point (0 through  
25 3) scale of adjustment, with higher ratings indicating poorer adjustment status. The sexual  
26 relationship domain evaluates shifts in the quality of sexual relations due to the current illness or  
27 treatment. It consists of six items and the total score ranges from 0 to 18. Low scores indicates good  
28 adjustment, and high scores poor adjustment.

### 29 30 31 32 33 34 35 36 37 *Exploratory outcomes*

38  
39 A more extensive evaluation of physical, psychological, and demographic status over time will be  
40 performed. Physical examination will include pelvic floor strength and endurance assessed  
41 according to the Modified Oxford grading scheme which is a manual digital examination of the  
42 pelvic floor. It is tested and validated and used in several trials.<sup>65, 66</sup> Furthermore physical capacity  
43 will be measured by peak VO<sub>2</sub> using cardiopulmonary exercise testing (Ergo-Spiro CS-200,  
44 Schiller, Switzerland) with measurement of oxygen uptake (VO<sub>2</sub>), heart rate (HR, beats  
45 /min), ventilation rate (VE, l/min), ventilation frequency (VF, number / min), respiratory expiration  
46 ratio (RER, CO<sub>2</sub>/O<sub>2</sub>in%), blood pressure, physical activity level (METS) and gas exchange (VO<sub>2</sub>  
47 and VCO<sub>2</sub>) during progressive loading and in the following recovery period. The test is conducted  
48 before the training programme initiates. Intensity performed as a ramp protocol (load gradually  
49 increases) with the initial work load of 25W and increased by 12.5W every minute until exhaustion,  
50  
51  
52  
53  
54  
55  
56  
57  
58  
59  
60

usually but not always, is where the patient's oxygen uptake reaches steady state despite additional load. The test follows current standards for cardiopulmonary exercise testing.<sup>67</sup> The full test procedure is described by Rasmussen et al.<sup>50</sup> Additionally a series of questionnaires, regarding health related quality of life, anxiety and depression and sexual dysfunction are administered. (see table 2)

**Table 2 CopenHeart<sub>SF</sub> - Exploratory quantities subjected to post hoc analysis**

| Quantity                                                                                                                                                       | Time of measure        | Type of quantity |
|----------------------------------------------------------------------------------------------------------------------------------------------------------------|------------------------|------------------|
| <b>Demographic</b>                                                                                                                                             |                        |                  |
| Age, height, weight                                                                                                                                            | Baseline               | Continuous       |
| Marital, educational, occupational status                                                                                                                      | Baseline               | Categorical      |
| Smoking                                                                                                                                                        | Baseline               | Binary (Y/N)     |
| <b>Clinical</b>                                                                                                                                                |                        |                  |
| Nutritional status (BMI)                                                                                                                                       | Baseline               | Continuous       |
| NYHA classification                                                                                                                                            | Baseline               | Continuous       |
| Type of heart disease                                                                                                                                          | Baseline               | Categorical      |
| Type of sexual dysfunction                                                                                                                                     | Baseline               | Categorical      |
| Diabetes mellitus                                                                                                                                              | Baseline               | Binary (Y/N)     |
| Level of physical activity                                                                                                                                     | Baseline               | Categorical      |
| Level of rehabilitation offered                                                                                                                                | Baseline               | Categorical      |
| PDE-5 inhibitor intake, Level of activity within the last 4 weeks, Level of sexual activity                                                                    | Baseline, W12, W16, M6 | Categorical      |
| <b>Para clinical</b>                                                                                                                                           |                        |                  |
| Cholesterol level                                                                                                                                              | Baseline               | Continuous       |
| <b>Functional capacity</b>                                                                                                                                     |                        |                  |
| Peak VO <sub>2</sub>                                                                                                                                           | Baseline, W12          | Continuous       |
| Pelvic floor strength and endurance                                                                                                                            | Baseline, W12          | Continuous       |
| <b>Serious adverse events</b>                                                                                                                                  |                        |                  |
| <b>Questionnaires</b>                                                                                                                                          |                        |                  |
| SF-36 <sup>68</sup> , HADS <sup>69</sup> , EQ-5D-5L <sup>70</sup> , FAME <sup>71</sup> , Sex after ICD questionnaire <sup>16</sup>                             | Baseline, W16, M6      | Continuous       |
| BMI, body mass index; SF-36, Short Form-36; HADS, Hospital Anxiety and Depression Scale; Eq-5D-5L, EuroQol; FAME, Female assessment of male erectile function, |                        |                  |

### Blinding

It is not possible to blind the allocated intervention group for the staff and the participants.<sup>72</sup> All physical testing, data collection and administration will be conducted by blinded staff, however. Statistical analyses and drawing of conclusions from these will also be conducted blinded to the intervention group.

### Sample size and power calculations

We are planning a trial of the continuous response variable IIEF<sup>45, 46</sup> from independent control and experimental participants with one control per experimental participant. In a previous trial the IIEF within each participant group was normally distributed with a standard deviation of 6 points.<sup>34</sup> If the true difference in the experimental and control means is 3.5 points, we will need to include 77 experimental participants and 77 control participants (total 154 participants) to obtain a power of 95% (beta = 5%) and a type 1 error probability of 5%. Using this sample size, a standard deviation of 4 points and an alternative hypothesis of a mean difference of 2 points for the secondary outcome and a type 1 error probability of 5% the corresponding power for the secondary outcome is found to be 87%.

### Study procedure and randomisation

To achieve our estimated sample size of 154 participants, patients will be identified from the hospital databases. Patients will be selected consecutively. Patients with an implantable cardioverter defibrillator are required to have the device implanted more than one year prior to inclusion and patients with ischaemic heart disease one year from event and backward. The one year limit has been set so that patients are past their rehabilitation if any is provided. Patients will receive the International Index of Erectile Function questionnaire<sup>45</sup> by mail including a stamped return envelope. Patients with a score less than or equal to 25, the accepted cut-off score<sup>46</sup>, on the initial screening are invited to attend a preliminary interview with the offer to participate in a randomised clinical trial targeting sexual problems. The participant information is send to the patient along with the invitation. This gives the patient an opportunity to read the material in advance and to prepare possible questions. At the initial interview/meeting it is determined whether the patient meets the criteria for participating in the trial. If patients are suited and want to participate they will be randomised to either a comprehensive sexual rehabilitation programme plus usual care versus usual care alone. Stratification will be according to patient group (patients with ischaemic heart disease or implantable cardioverter defibrillator) and age ( $\leq 59$  years or  $\geq 60$  years and randomised 1:1 to the experimental group or the control group. Randomisation will be performed centrally by the trial coordination centre, Copenhagen Trial Unit, according to a computer-generated allocation sequence with a variable block size concealed from the investigators. Allocation to the intervention groups is

1  
2  
3  
4 done when the investigator calls Copenhagen Trial Unit. Relevant information (personal  
5 identification number, strata, etc.) is typed into a computer system, and then the participant will be  
6 allocated to an intervention group and awarded a four-digit randomisation number. The investigator  
7 then informs the patient of the result and on how to proceed by letter. Thus, neither investigators  
8 nor patients or relatives can influence to which group the patient are allocated. For both groups,  
9 follow-up assessment will take place after 12 weeks (only physical evaluation), 16 weeks, and 6  
10 months. Questionnaires will be completed electronically in the questionnaire system Enalyzer with  
11 'single user', which meets the data legislation for logging. At inclusion, the trial participant will  
12 receive an email with a link to a website through which questionnaires can be completed. The e-  
13 mail contains a login and password for the trial participant's personal access. The participant has the  
14 opportunity to go through the website [www.copenheart.org](http://www.copenheart.org) and login with the log-in and password.  
15 If patients do not complete the questionnaire electronically, the material can be sent in paper form  
16 and independent trial personnel then enters the responses into the database. Thus data management  
17 is handled independently from the researchers who interpret the data. All data are stored  
18 electronically in a coded database, and in an independent spread sheet, only accessible for the  
19 CopenHeart group. The recruitment process will continue until the number of 154 has been reached.  
20  
21  
22  
23  
24  
25  
26  
27  
28  
29  
30  
31

## 32 **Statistical analysis**

### 33 *Analysis of primary and secondary outcomes*

34  
35 The analysis will be performed according to the intention-to-treat analysis with two sided  
36 significance tests at the 0.05 level. Both outcomes (and outcomes subjected to exploratory analyses)  
37 will be analysed using the same procedure. First, we will test if there is an immediate effect of the  
38 intervention on the outcome and/or a difference in the response to the intervention between the two  
39 patient groups (patients with ischaemic heart disease and patients with implantable cardioverter  
40 defibrillator) using model 1 below. Then the follow-up data will be included in the analysis and the  
41 long-term effect will be studied using model 2.  
42  
43  
44  
45  
46  
47  
48

### 49 *Models and analytical techniques*

50 *Model 1* The equation (equation 1) showing the dependent variable Y (the outcome) as a function of  
51 covariates used in the analysis of the immediate effect of the intervention on the primary outcome  
52 is  $Y = \text{intercept} + a \cdot Y_{\text{baseline}} + b \cdot I + c \cdot G + d \cdot I : G$  (equation 1).  
53  
54  
55  
56  
57  
58  
59  
60

1  
2  
3  
4  $Y_{\text{baseline}}$  is the baseline value of the outcome, I is the indicator of intervention, G is the indicator of  
5 patient group, and a through d are coefficients to be estimated. The term d·I:G stands for interaction  
6 between the two covariates I and G. If the term b·I is significant (the coefficient b differs  
7 significantly from 0) there is an effect of the intervention common for the two patient groups  
8 (ischaemic patients and patients with implantable cardioverter defibrillator). If the term d·I:G is  
9 significant there is an additional effect of the intervention in one of the two patient groups; thus a  
10 sub-group analysis is warranted. In the analysis of the data the univariate general linear model is  
11 used. The analysis of the primary outcome is the primary analysis. The sub-group analysis and the  
12 analysis of the secondary and of other outcomes should be considered exploratory.  
13  
14  
15  
16  
17  
18  
19

20  
21 *Model 2* In the analysis of follow up data the time T (Y is measured 16 weeks and 6 month  
22 following randomisation) is included and the mixed model for repeated measures is used. The  
23 equation (equation 2) for the fixed effect in this model showing Y as a function of the co-variates  
24 is  $Y = \text{intercept} + a \cdot Y_{\text{baseline}} + b \cdot G + c \cdot I + d \cdot I:G + e \cdot T + f \cdot I:T + g \cdot I:T:G$  (equation 2) where a through g  
25 are coefficients to be estimated. If the term e·T is significant there is a linear trend over time  
26 common for both patient groups. If f·I:T is significant, this trend is supplemented by an additional  
27 trend caused by the intervention and therefore specific for the intervention group. If in addition  
28 g·I:T:G is significant this added trend differs between the two patient groups (patients with  
29 ischaemic heart disease and patients with implantable cardioverter defibrillator). In the mixed  
30 model analysis an unstructured covariance matrix will be assumed. If convergence is not attained  
31 simpler covariance structure models will be assessed guided by Akaike's criterion or maximum  
32 likelihood test as appropriate.  
33  
34  
35  
36  
37  
38  
39  
40  
41

#### 42 *Missing values*

43  
44 If the number of missing cases for a given outcome (number of patients with one or more model  
45 variables missing) is larger than 5% or p of Little's test is < 5% multiple imputations of the model  
46 variables (outcome plus co-variates) is done using SPSS version 17. The range of potential bias in  
47 case the missing values should not be random is assessed by doing two imputations (1) imputing  
48 missing outcome value in one group by minimum value found in the material and missing outcome  
49 value in the other group by maximum value found in material and (2) vice versa. Then in each case  
50 an unadjusted analysis is done to estimate the parameter of interest.  
51  
52  
53  
54  
55  
56  
57  
58  
59  
60

## ETHICS AND DISSEMINATION

1  
2  
3  
4  
5  
6  
7  
8  
9  
10  
11  
12  
13  
14  
15  
16  
17  
18  
19  
20  
21  
22  
23  
24  
25  
26  
27  
28  
29  
30  
31  
32  
33  
34  
35  
36  
37  
38  
39  
40  
41  
42  
43  
44  
45  
46  
47  
48  
49  
50  
51  
52  
53  
54  
55  
56  
57  
58  
59  
60

Trial protocol has been approved by the Regional Ethics Committee (no H-4-2012-168) and the Danish Data Protection Agency (no 2007-58-0015). The trial complies with the latest declaration of Helsinki and is registered at ClinicalTrials.gov (NCT01796353). Patients are informed about the trial in writing as well as verbally and only included if a written informed consent is obtained. Patients are assessed in accordance to whether it is safe for them to perform sexual activity. This is done according to recommendations from the Princeton consensus group.<sup>32, 53</sup> If patients are suited and want to participate they will be enrolled in the trial. Trial participants are free to withdraw their informed consent at any time and be treated according to the departments' standard treatment procedures. A patient will be withdrawn from the trial if the trial participant withdraws his consent and will, in connection therewith, be informed that termination of the trial will have no implications for his future treatment. Patients who leave the trial will be politely asked for permission to continue to collect data and to use already collected data. If the patient gives permission, he will be included in the final analysis. Only if the patient refuses use of already collected data, will all data relating to him, be destroyed. All patient data will be handled and stored in accordance with Danish Data Protection Agency rules and patients are ensured anonymity. The trial will be conducted according to the Act. No. 593 of June 14 2011 on Act on Research Ethics Review of Health Research Projects. The investigator will immediately notify the regional ethics committee if, within the interventions period, there occur Serious Adverse Events, Serious Adverse Reactions, or Suspected Unexpected Serious Adverse Reactions. The report will be accompanied by comments on possible implications for the trial, and notification will be made within 7 days after the investigator has knowledge of the event. The trial has no data monitoring committee however an internal monitor will perform random checks to see if the trial staff work according to the protocol. No risks are anticipated to occur during the sexual rehabilitation programme. As far as we know, there is no previous risk associated with nursing consultations. If the nurse during the consultation identifies a need for further consultations with professionals, she will encourage the participant to seek help from the general practitioner, psychologist, or in their usual outpatient setting. Risks associated with exercise training and testing are sudden cardiac death associated with ventricular arrhythmias, acute myocardial infarction, and in patients with chronic heart failure, pulmonary oedema and deterioration in left ventricular function.<sup>73</sup> The last is only found in one study from 1988<sup>74</sup> and has not subsequently been demonstrated in larger studies.<sup>75, 76</sup> In a recent French study of more than 25,000 patients with ischaemic heart disease, one third with chronic heart failure

1  
2  
3  
4 found the risk of cardiac complications at 1:8,500 exercise testing and 1:50,000 patient exercise  
5 hours.<sup>77</sup> Increasing exercise intensity and age are risk indicators. Therefore, the training intensity  
6 will be conducted as moderate high intensity (less than 80% of VO<sub>2</sub> max). To achieve  
7 cardiovascular adjustment both exercise training and testing begins with a warming-up period and  
8 ends with a cool-down period, with a gradual downward adjustment of exercise intensity and heart  
9 rate, rather than an abrupt end. This cardiovascular adjustment has been shown to reduce the risk of  
10 ischaemia and arrhythmia in connection with physical exercise.<sup>44, 62</sup> Participants must mainly  
11 exercise in an upright position to decrease left ventricular filling pressure and risk of ischemia or  
12 heart failure triggered ventricular arrhythmias. When these precautions are respected, both exercise  
13 training and exercise testing are considered to possess a low risk for the participants. There is, as far  
14 as we know, no previously known risk associated with pelvic floor exercise. Testing or examination  
15 of the pelvic floor may be associated with discomfort for the participants but is not considered to be  
16 associated with any risk. Staff members will be trained according to guidelines to handle any  
17 emergencies.  
18  
19  
20  
21  
22  
23  
24  
25  
26  
27  
28

### 29 **Dissemination plan**

30 Positive, neutral, and negative results of the trial will be submitted to international peer reviewed  
31 journals of nursing, cardiology or sexology. Furthermore, results will be presented at national and  
32 international conferences relevant to subject fields. Authorship will be allocated using the  
33 guidelines for authorship defined by the International Committee of Medical Journal Editors and  
34 depends on the personal involvement. All the articles, abstracts as well as the results will be posted  
35 on the website [www.copenheart.org](http://www.copenheart.org). The website will be continuously updated and will be  
36 highlighted through the scientific articles. CopenHeart staff will have access to data. Ethic committees  
37 and competent authorities will be able to obtain direct access to data and documentation.  
38  
39  
40  
41  
42  
43  
44  
45

### 46 **DISCUSSION**

47 This randomised clinical trial testing the effect of a comprehensive sexual rehabilitation  
48 intervention on a population of patients with implantable cardioverter defibrillator or patients with  
49 ischaemic heart disease seems to be the first one in its field. The trial is expected to contribute with  
50 results that can improve patients' problems related to heart disease and sexual function.  
51 Additionally, it is believed that the trial can provide a systematic approach that may one day inform  
52 national consensus on how to treat sexual dysfunction in heart patients. Furthermore, the results of  
53  
54  
55  
56  
57  
58  
59  
60

1  
2  
3  
4 the trial are expected to contribute to the international debate on sexual rehabilitation of patients  
5 with heart disease.

6  
7 The trial is designed with central stratified randomisation which secures against selection bias.<sup>78, 79</sup>

8  
9 The primary outcome is assessed blinded to intervention and so are all statistical analysis, which  
10 should reduce detection and interpretation bias.<sup>78, 79</sup>

### 11 12 13 **Trajectory**

14 Inclusion was initiated February 2013 and is expected to continue until June 2014.

### 15 16 17 **Acknowledgements:**

18  
19 The test and rehabilitation team responsible for the trial is: Karina Jensen, Lars Tang, Helena Tjalk  
20 Sørensen, Signe Gils and Katrine Tingholm Erhardsen.

### 21 22 23 24 25 26 **Contributorship Statement**

27  
28 PPJ, SKB, ADZ, JHs, MF, JL, PW, CG, AG, ES, TJ all designed the study and developed the protocol. PW  
29 specifically designed the statistical analysis plan. PPJ, SKB, ADZ drafted the manuscript. PPJ, SKB, ADZ, JHS,  
30 MF, JL, PW, CG, AG, ES, TJ all revised the manuscript critically. All authors have given their final approval of  
31 the version to be published

### 32 33 34 35 36 **Funding statement:**

37  
38 The CopenHeart trial has received funding from: The Danish Heart Foundation (no. 13-04-R95-  
39 A4669-22744); The Health Foundation (no. 2013B208 ); Danish Council for Strategic Research  
40 (no. 10-092790); The Danish Nursing Council. Neither of the funders had influence of the study  
41 protocol and design, the execution of the trial or the interpretation of data.

### 42 43 44 45 46 **Competing interest:**

47  
48 None



## REFERENCES

1. Hoekstra T, Jaarsma T, Sanderman R, et al. Perceived sexual difficulties and associated factors in patients with heart failure. *Am Heart J* 2012; Feb;163(2):246-51.
2. Laumann EO, Paik A, Rosen RC. Sexual dysfunction in the United States: prevalence and predictors. *JAMA* 1999; Feb 10;281(6):537-44.
3. Feldman HA, Goldstein I, Hatzichristou DG, et al. Impotence and its medical and psychosocial correlates: results of the Massachusetts Male Aging Study. *J Urol* 1994; Jan;151(1):54-61.
4. Feldman HA, Johannes CB, Derby CA, et al. Erectile dysfunction and coronary risk factors: prospective results from the Massachusetts male aging study. *Prev Med* 2000; Apr;30(4):328-38.
5. Bacon CG, Mittleman MA, Kawachi I, et al. Sexual function in men older than 50 years of age: results from the health professionals follow-up study. *Ann Intern Med* 2003; Aug 5;139(3):161-8.
6. Levine GN, Steinke EE, Bakaeen FG, et al. Sexual activity and cardiovascular disease: a scientific statement from the American Heart Association. *Circulation* 2012; Feb 28;125(8):1058-72.
7. Steinke EE. Sexual dysfunction in women with cardiovascular disease: what do we know?. *J Cardiovasc Nurs* 2010; Mar-Apr;25(2):151-8.
8. Lewis RW, Fugl-Meyer KS, Corona G, et al. Definitions/epidemiology/risk factors for sexual dysfunction. *J Sex Med* 2010; Apr;7(4 Pt 2):1598-607.
9. NIH Consensus Conference. Impotence. NIH Consensus Development Panel on Impotence. *JAMA* 1993; Jul 7;270(1):83-90.

1  
2  
3  
4 10. Rastogi S, Rodriguez JJ, Kapur V, et al. Why do patients with heart failure suffer from erectile  
5  
6 dysfunction? A critical review and suggestions on how to approach this problem. *Int J Impot Res*  
7  
8 2005; Dec;17 Suppl 1:S25-36.

9  
10  
11 11. Berg SK, Elleman-Jensen L, Zwisler AD, et al. Sexual concerns and practices after ICD  
12  
13 implantation: findings of the COPE-ICD rehabilitation trial. *Eur J Cardiovasc Nurs* 2013; Jan 8;.

14  
15  
16  
17 12. Bortolotti A, Parazzini F, Colli E, et al. The epidemiology of erectile dysfunction and its risk  
18  
19 factors. *Int J Androl* 1997; Dec;20(6):323-34.

20  
21  
22  
23 13. Herbert K, Lopez B, Castellano J, et al. The prevalence of erectile dysfunction in heart failure  
24  
25 patients by race and ethnicity. *Int J Impot Res* 2008; Sep-Oct;20(5):507-11.

26  
27  
28  
29 14. Kloner RA, Mullin SH, Shook T, et al. Erectile dysfunction in the cardiac patient: how common  
30  
31 and should we treat?. *J Urol* 2003; Aug;170(2 Pt 2):S46,50; discussion S50.

32  
33  
34 15. Montorsi F, Briganti A, Salonia A, et al. Erectile dysfunction prevalence, time of onset and  
35  
36 association with risk factors in 300 consecutive patients with acute chest pain and angiographically  
37  
38 documented coronary artery disease. *Eur Urol* 2003; Sep;44(3):360,4; discussion 364-5.

39  
40  
41  
42 16. Steinke EE. Sexual concerns of patients and partners after an implantable cardioverter  
43  
44 defibrillator. *Dimens Crit Care Nurs* 2003; Mar-Apr;22(2):89-96.

45  
46  
47 17. Dabrowski R, Smolis-Bak E, Kowalik I, et al. Quality of life and depression in patients with  
48  
49 different patterns of atrial fibrillation. *Kardiol Pol* 2010; Oct;68(10):1133-9.

50  
51  
52  
53 18. Drory Y, Kravetz S, Weingarten M. Comparison of sexual activity of women and men after a  
54  
55 first acute myocardial infarction. *Am J Cardiol* 2000; Jun 1;85(11):1283-7.

- 1  
2  
3  
4 19. Foroutan SK, Rajabi M. Erectile dysfunction in men with angiographically documented  
5 coronary artery disease. *Urol J* 2007; Winter;4(1):28-32.  
6  
7  
8  
9  
10 20. Justo D, Arbel Y, Mulat B, et al. Sexual activity and erectile dysfunction in elderly men with  
11 angiographically documented coronary artery disease. *Int J Impot Res* 2010; Jan-Feb;22(1):40-4.  
12  
13  
14  
15 21. Dunn KM, Croft PR, Hackett GI. Association of sexual problems with social, psychological,  
16 and physical problems in men and women: a cross sectional population survey. *J Epidemiol*  
17  
18  
19  
20  
21  
22  
23 22. Friedman S. Cardiac disease, anxiety, and sexual functioning. *Am J Cardiol* 2000; Jul  
24  
25  
26  
27  
28  
29 23. Kriston L, Gunzler C, Agyemang A, et al. Effect of sexual function on health-related quality of  
30 life mediated by depressive symptoms in cardiac rehabilitation. findings of the SPARK project in  
31  
32  
33  
34  
35  
36  
37 24. Mulat B, Arbel Y, Mashav N, et al. Depressive symptoms and erectile dysfunction in men with  
38 coronary artery disease. *Urology* 2010; Jan;75(1):104-7.  
39  
40  
41  
42 25. Makhlof A, Kparker A, Niederberger CS. Depression and erectile dysfunction. *Urol Clin*  
43  
44  
45  
46  
47  
48 26. Roose SP. Depression: links with ischemic heart disease and erectile dysfunction. *J Clin*  
49  
50  
51  
52  
53 27. Dickstein K, Cohen-Solal A, Filippatos G, et al. ESC Guidelines for the diagnosis and treatment  
54 of acute and chronic heart failure 2008: the Task Force for the Diagnosis and Treatment of Acute  
55  
56  
57  
58  
59  
60

1  
2  
3  
4 and Chronic Heart Failure 2008 of the European Society of Cardiology. Developed in collaboration  
5  
6 with the Heart Failure Association of the ESC (HFA) and endorsed by the European Society of  
7  
8 Intensive Care Medicine (ESICM). *Eur Heart J* 2008; Oct;29(19):2388-442.  
9

10  
11 28. Heart Failure Society Of A. HFSA 2006 Comprehensive Heart Failure Practice Guideline. *J*  
12  
13 *Card Fail* 2006; Feb;12(1):e1-2.  
14

15  
16  
17 29. Bedell SE, Duperval M, Goldberg R. Cardiologists' discussions about sexuality with patients  
18  
19 with chronic coronary artery disease. *Am Heart J* 2002; Aug;144(2):239-42.  
20

21  
22  
23 30. Jaarsma T, Stromberg A, Fridlund B, et al. Sexual counselling of cardiac patients: nurses'  
24  
25 perception of practice, responsibility and confidence. *Eur J Cardiovasc Nurs* 2010; Mar;9(1):24-9.  
26

27  
28  
29 31. Jackson G, Boon N, Eardley I, et al. Erectile dysfunction and coronary artery disease prediction:  
30  
31 evidence-based guidance and consensus. *Int J Clin Pract* 2010; Jun;64(7):848-57.  
32

33  
34 32. Jackson G, Rosen RC, Kloner RA, et al. The second Princeton consensus on sexual dysfunction  
35  
36 and cardiac risk: new guidelines for sexual medicine. *J Sex Med* 2006; Jan;3(1):28,36; discussion  
37  
38 36.  
39

40  
41  
42 33. Gupta BP, Murad MH, Clifton MM, et al. The effect of lifestyle modification and  
43  
44 cardiovascular risk factor reduction on erectile dysfunction: a systematic review and meta-analysis.  
45  
46 *Arch Intern Med* 2011; Nov 14;171(20):1797-803.  
47

48  
49  
50 34. Maio G, Saraeb S, Marchiori A. Physical activity and PDE5 inhibitors in the treatment of  
51  
52 erectile dysfunction: results of a randomized controlled study. *J Sex Med* 2010; Jun;7(6):2201-8.  
53  
54  
55  
56  
57  
58  
59  
60

- 1  
2  
3  
4 35. Roviario R, Holmes D, Holmsten R. Influence of a Cardiac Rehabilitation Program on the  
5  
6 Cardiovascular, Psychological, and Social Functioning of Cardiac Patients. *J Beh Med*  
7  
8 1984;7(1):61.  
9  
10  
11 36. Froelicher ES, Kee LL, Newton KM, et al. Return to work, sexual activity, and other activities  
12  
13 after acute myocardial infarction. *Heart Lung* 1994; Sep-Oct;23(5):423-35.  
14  
15  
16  
17 37. Belardinelli R, Lacalaprice F, Faccenda E, et al. Effects of short-term moderate exercise training  
18  
19 on sexual function in male patients with chronic stable heart failure. *Int J Cardiol* 2005; May  
20  
21 11;101(1):83-90.  
22  
23  
24  
25 38. Bertie J, King A, Reed N, et al. Benefits and weaknesses of a cardiac rehabilitation programme.  
26  
27 *J R Coll Physicians Lond* 1992; Apr;26(2):147-51.  
28  
29  
30  
31 39. Lidell E, Fridlund B. Long-term effects of a comprehensive rehabilitation programme after  
32  
33 myocardial infarction. *Scand J Caring Sci* 1996;10(2):67-74.  
34  
35  
36  
37 40. Klein R, Bar-on E, Klein J, et al. The impact of sexual therapy on patients after cardiac events  
38  
39 participating in a cardiac rehabilitation program. *Eur J Cardiovasc Prev Rehabil* 2007;  
40  
41 Oct;14(5):672-8.  
42  
43  
44 41. Dorey G, Speakman MJ, Feneley RC, et al. Pelvic floor exercises for erectile dysfunction. *BJU*  
45  
46 *Int* 2005; Sep;96(4):595-7.  
47  
48  
49  
50 42. Van Kampen M, De Weerd W, Claes H, et al. Treatment of erectile dysfunction by perineal  
51  
52 exercise, electromyographic biofeedback, and electrical stimulation. *Phys Ther* 2003;  
53  
54 Jun;83(6):536-43.  
55  
56  
57  
58  
59  
60

1  
2  
3  
4 43. Balady GJ, Williams MA, Ades PA, et al. Core components of cardiac rehabilitation/secondary  
5 prevention programs: 2007 update: a scientific statement from the American Heart Association  
6 Exercise, Cardiac Rehabilitation, and Prevention Committee, the Council on Clinical Cardiology;  
7 the Councils on Cardiovascular Nursing, Epidemiology and Prevention, and Nutrition, Physical  
8 Activity, and Metabolism; and the American Association of Cardiovascular and Pulmonary  
9 Rehabilitation. *J Cardiopulm Rehabil Prev* 2007; May-Jun;27(3):121-9.

10  
11  
12  
13  
14  
15  
16  
17  
18 44. Fitchet A, Doherty PJ, Bundy C, et al. Comprehensive cardiac rehabilitation programme for  
19 implantable cardioverter-defibrillator patients: a randomised controlled trial. *Heart* 2003;  
20 Feb;89(2):155-60.

21  
22  
23  
24  
25  
26 45. Rosen RC, Riley A, Wagner G, et al. The international index of erectile function (IIEF): a  
27 multidimensional scale for assessment of erectile dysfunction. *Urology* 1997; Jun;49(6):822-30.

28  
29  
30  
31  
32 46. Rosen RC, Cappelleri JC, Gendrano N,3rd. The International Index of Erectile Function (IIEF):  
33 a state-of-the-science review. *Int J Impot Res* 2002; Aug;14(4):226-44.

34  
35  
36  
37 47. Derogatis LR. The psychosocial adjustment to illness scale (PAIS). *J Psychosom Res*  
38 1986;30(1):77-91.

39  
40  
41  
42 48. Westlake C, Dracup K, Walden JA, et al. Sexuality of patients with advanced heart failure and  
43 their spouses or partners. *J Heart Lung Transplant* 1999; Nov;18(11):1133-8.

44  
45  
46  
47  
48 49. Jaarsma T. Sexual problems in heart failure patients. *Eur J Cardiovasc Nurs* 2002; Feb;1(1):61-  
49 7.

50  
51  
52  
53  
54 50. Rasmussen TB, Zwisler AD, Sibilitz KL, et al. A randomised clinical trial of comprehensive  
55 cardiac rehabilitation versus usual care for patients treated for infective endocarditis--the  
56

1  
2  
3  
4 CopenHeartIE trial protocol. *BMJ Open* 2012; Nov 21;2(6):10.1136/bmjopen,2012-001929. Print  
5  
6 2012.

7  
8  
9  
10 51. Risom SS, Zwisler AD, Rasmussen TB, et al. The effect of integrated cardiac rehabilitation  
11 versus treatment as usual for atrial fibrillation patients treated with ablation: the randomised  
12 CopenHeartRFA trial protocol. *BMJ Open* 2013; Feb 20;3(2):10.1136/bmjopen,2012-002377. Print  
13  
14 2013.

15  
16  
17  
18 52. Sibilitz KL, Berg SK, Hansen TB, et al. Effect of comprehensive cardiac rehabilitation after  
19 heart valve surgery (CopenHeartVR): study protocol for a randomised clinical trial. *Trials* 2013;  
20  
21 Apr 22;14(1):104.

22  
23  
24  
25 53. Nehra A, Jackson G, Miner M, et al. The Princeton III Consensus recommendations for the  
26 management of erectile dysfunction and cardiovascular disease. *Mayo Clin Proc* 2012;  
27  
28 Aug;87(8):766-78.

29  
30  
31  
32 54. Perk J, De Backer G, Gohlke H, et al. European guidelines on cardiovascular disease prevention  
33 in clinical practice (version 2012) : the fifth joint task force of the European society of cardiology  
34 and other societies on cardiovascular disease prevention in clinical practice (constituted by  
35 representatives of nine societies and by invited experts). *Int J Behav Med* 2012; Dec;19(4):403-88.

36  
37  
38  
39 55. Piepoli MF, Corra U, Benzer W, et al. Secondary prevention through cardiac rehabilitation:  
40 from knowledge to implementation. A position paper from the Cardiac Rehabilitation Section of the  
41 European Association of Cardiovascular Prevention and Rehabilitation. *Eur J Cardiovasc Prev  
42 Rehabil* 2010; Feb;17(1):1-17.  
43  
44  
45  
46  
47  
48  
49  
50  
51  
52  
53  
54  
55  
56  
57  
58  
59  
60

1  
2  
3  
4 56. Berg SK. *Comprehensive rehabilitation for patients with ICD: PhD dissertation*. [Aarhus]:  
5  
6  
7

8  
9  
10 Faculty of Health Sciences, Aarhus University; 2011.

11  
12 57. Zwisler AD, Soja AM, Rasmussen S, et al. Hospital-based comprehensive cardiac rehabilitation  
13  
14 versus usual care among patients with congestive heart failure, ischemic heart disease, or high risk  
15  
16 of ischemic heart disease: 12-month results of a randomized clinical trial. *Am Heart J* 2008;  
17  
18 Jun;155(6):1106-13.

19  
20 58. Ashworth NL, Chad KE, Harrison EL, et al. Home versus center based physical activity  
21  
22 programs in older adults. *Cochrane Database Syst Rev* 2005; Jan 25;(1)(1):CD004017.

23  
24 59. Oerkild B, Frederiksen M, Hansen JF, et al. Home-based cardiac rehabilitation is as effective as  
25  
26 centre-based cardiac rehabilitation among elderly with coronary heart disease: results from a  
27  
28 randomised clinical trial. *Age Ageing* 2011; Jan;40(1):78-85.

29  
30 60. Borg GA. Psychophysical bases of perceived exertion. *Med Sci Sports Exerc* 1982;14(5):377-  
31  
32 81.

33  
34 61. Williams MA, Haskell WL, Ades PA, et al. Resistance exercise in individuals with and without  
35  
36 cardiovascular disease: 2007 update: a scientific statement from the American Heart Association  
37  
38 Council on Clinical Cardiology and Council on Nutrition, Physical Activity, and Metabolism.  
39  
40  
41  
42  
43  
44  
45  
46  
47  
48  
49  
50  
51  
52  
53  
54  
55  
56  
57  
58  
59  
60  
*Circulation* 2007; Jul 31;116(5):572-84.

62. Lampman RM, Knight BP. Prescribing exercise training for patients with defibrillators. *Am J  
Phys Med Rehabil* 2000; May-Jun;79(3):292-7.

63. Dorey G, Glazener C, Buckley B, et al. Developing a pelvic floor muscle training regimen for  
use in a trial intervention. *Physiotherapy* 2009; Sep;95(3):199-209.



- 1  
2  
3  
4 64. Parse RR. *The human becoming school of thought: a perspective for nurses and other health*  
5  
6 *professionals*. Thousand Oaks, Calif.: Sage; 1998.  
7  
8  
9  
10 65. Tibaek S, Klarskov P, Lund Hansen B, et al. Pelvic floor muscle training before transurethral  
11  
12 resection of the prostate: a randomized, controlled, blinded study. *Scand J Urol Nephrol*  
13  
14 2007;41(4):329-34.  
15  
16  
17 66. Schüssler B. *Pelvic floor re-education: principles and practice*. London: Springer; 1994.  
18  
19  
20  
21 67. Mezzani A, Agostoni P, Cohen-Solal A, et al. Standards for the use of cardiopulmonary exercise  
22  
23 testing for the functional evaluation of cardiac patients: a report from the Exercise Physiology  
24  
25 Section of the European Association for Cardiovascular Prevention and Rehabilitation. *Eur J*  
26  
27 *Cardiovasc Prev Rehabil* 2009; Jun;16(3):249-67.  
28  
29  
30  
31 68. Ware JE, Kosinski M, Gandek B. SF-36 Health Survey.: Manual and Interpretation guide  
32  
33 2005;The Health Institute, New England Medical Center, Boston, Massachusetts.  
34  
35  
36 69. Zigmond AS, Snaith RP. The hospital anxiety and depression scale. *Acta Psychiatr Scand* 1983;  
37  
38 Jun;67(6):361-70.  
39  
40  
41  
42 70. Drummond MF. *Methods for the economic evaluation of health care programmes*. 3rd edition  
43  
44 ed. Oxford: Oxford University Press; 2005.  
45  
46  
47 71. Rubio-Aurioles E, Sand M, Terrein-Roccatti N, et al. Female Assessment of Male Erectile  
48  
49 dysfunction detection scale (FAME): development and validation. *J Sex Med* 2009; Aug;6(8):2255-  
50  
51 70.  
52  
53  
54  
55  
56  
57  
58  
59  
60

1  
2  
3  
4 72. Boutron I, Moher D, Altman DG, et al. Extending the CONSORT statement to randomized  
5  
6 trials of nonpharmacologic treatment: explanation and elaboration. *Ann Intern Med* 2008; Feb  
7  
8 19;148(4):295-309.  
9

10  
11 73. Fletcher GF, Balady GJ, Amsterdam EA, et al. Exercise standards for testing and training: a  
12  
13 statement for healthcare professionals from the American Heart Association. *Circulation* 2001; Oct  
14  
15 2;104(14):1694-740.  
16  
17

18  
19 74. Jugdutt BI, Michorowski BL, Kappagoda CT. Exercise training after anterior Q wave  
20  
21 myocardial infarction: importance of regional left ventricular function and topography. *J Am Coll*  
22  
23 *Cardiol* 1988; Aug;12(2):362-72.  
24  
25

26  
27 75. Giannuzzi P, Tavazzi L, Temporelli PL, et al. Long-term physical training and left ventricular  
28  
29 remodeling after anterior myocardial infarction: results of the Exercise in Anterior Myocardial  
30  
31 Infarction (EAMI) trial. EAMI Study Group. *J Am Coll Cardiol* 1993; Dec;22(7):1821-9.  
32  
33

34  
35 76. Otsuka Y, Takaki H, Okano Y, et al. Exercise training without ventricular remodeling in  
36  
37 patients with moderate to severe left ventricular dysfunction early after acute myocardial infarction.  
38  
39 *Int J Cardiol* 2003; Feb;87(2-3):237-44.  
40  
41

42  
43 77. Pavy B, Iliou MC, Meurin P, et al. Safety of exercise training for cardiac patients: results of the  
44  
45 French registry of complications during cardiac rehabilitation. *Arch Intern Med* 2006; Nov  
46  
47 27;166(21):2329-34.  
48  
49

50  
51 78. Savovic J, Jones HE, Altman DG, et al. Influence of reported study design characteristics on  
52  
53 intervention effect estimates from randomized, controlled trials. *Ann Intern Med* 2012; Sep  
54  
55 18;157(6):429-38.  
56  
57  
58  
59  
60

1  
2  
3  
4  
5  
6  
7  
8  
9  
10  
11  
12  
13  
14  
15  
16  
17  
18  
19  
20  
21  
22  
23  
24  
25  
26  
27  
28  
29  
30  
31  
32  
33  
34  
35  
36  
37  
38  
39  
40  
41  
42  
43  
44  
45  
46  
47  
48  
49  
50  
51  
52  
53  
54  
55  
56  
57  
58  
59  
60

79. Wood L, Egger M, Gluud LL, et al. Empirical evidence of bias in treatment effect estimates in controlled trials with different interventions and outcomes: meta-epidemiological study. *BMJ* 2008; Mar 15;336(7644):601-5.

For peer review only

**The CopenHeartSF trial; Comprehensive sexual rehabilitation programme for male patients with implantable cardioverter defibrillator or ischaemic heart disease and impaired sexual function: protocol of a randomised clinical trial.**

**Pernille Palm Johansen<sup>1+2</sup>**

**Ann-Dorthe Zwisler<sup>2+3</sup>**

**Jesper Hastrup-Svendsen<sup>2+8</sup>**

**Marianne Fredriksen<sup>1</sup>**

**Jane Lindschou<sup>4</sup>**

**Per Winkel<sup>4</sup>**

**Christian Gluud<sup>4</sup>**

**Annamaria Giraldi<sup>5</sup>**

**Elaine Steinke<sup>6</sup>**

**Tiny Jaarsma<sup>7</sup>**

**Selina Kikkenborg Berg<sup>2</sup>**

<sup>1</sup>Department of Cardiology, Copenhagen University Hospital, Bispebjerg Hospital, Copenhagen, Denmark

<sup>2</sup>The Heart Centre, Copenhagen University Hospital, Rigshospitalet, Copenhagen, Denmark

<sup>3</sup>National Institute of Public Health, University of Southern Denmark

<sup>4</sup>The Copenhagen Trial Unit, Centre for Clinical Intervention Research, Rigshospitalet, Copenhagen University Hospital, Copenhagen, Denmark

<sup>5</sup>Sexological Clinic, Psychiatric Center Copenhagen, Copenhagen University Hospital, Rigshospitalet, Copenhagen, Denmark

<sup>6</sup>Wichita State University, Wichita, Kansas, United States

<sup>7</sup>Department of Social and Welfare Studies, Linköping University, Linköping, Sweden

<sup>8</sup>Institute of Clinical Medicine, Faculty of Health Science, University of Copenhagen

[Date: October 7, 2013. Version 1.2](#)

1  
2  
3  
4  
5  
6  
7  
8  
9  
10  
11  
12  
13  
14  
15  
16  
17  
18  
19  
20  
21  
22  
23  
24  
25  
26  
27  
28  
29  
30  
31  
32  
33  
34  
35  
36  
37  
38  
39  
40  
41  
42  
43  
44  
45  
46  
47  
48  
49  
50  
51  
52  
53  
54  
55  
56  
57  
58  
59  
60

**Corresponding author:**

Pernille Palm Johansen RN. MCN

Copenhagen University Hospital, Bispebjerg Hospital / Rigshospitalet

Copenhagen

Denmark

Mail: [pernille.palm.johansen@regionh.dk](mailto:pernille.palm.johansen@regionh.dk)

For peer review only

## ABSTRACT

**Introduction:** Sexuality is an important part of people's physical and mental health. Patients with heart disease often suffer from sexual dysfunction. Sexual dysfunction has a negative impact on quality of life and well-being in persons with heart disease, and sexual dysfunction is associated with anxiety and depression. Treatment and care possibilities seem to be lacking. Studies indicate that non-pharmacological interventions such as exercise training and psycho-education possess the potential of reducing sexual dysfunction in patients with heart disease. The CopenHeart<sub>SF</sub> trial will investigate the effect of a comprehensive sexual rehabilitation programme versus usual care.

**Methods and analysis:** CopenHeart<sub>SF</sub> is an investigator-initiated randomised clinical superiority trial with blinded outcome assessment, with 1:1 central randomisation to sexual rehabilitation plus usual care versus usual care alone. Based on sample size calculations, 154 male patients with impaired sexual function due to implantable cardioverter defibrillator or ischaemic heart disease will be included from two university hospitals in Denmark. All patients receive usual care and patients allocated to the experimental intervention group follow a 12 week sexual rehabilitation programme consisting of an individualised exercise program and psycho-educative consultation with a special trained nurse. The primary outcome is sexual function measured by the International Index of Erectile Function. The secondary outcome measure is psycho-social adjustment to illness by the Psychosocial Adjustment to Illness Scale, sexual domain. A number of explorative analyses will also be conducted.

**Ethics and dissemination:** CopenHeart<sub>SF</sub> is approved by the regional ethics committee (no H-4-2012-168) and the Danish Data Protection Agency (no 2007-58-0015) and is performed in accordance with good clinical practice and the Declaration of Helsinki in its latest form.

**Registration:** Clinicaltrials.gov identifier: NCT01796353

## ARTICLE SUMMARY

### Article focus

- The CopenHeart<sub>SF</sub> is a randomised clinical trial investigating the effects of a comprehensive sexual rehabilitation programme versus usual care for patients with sexual dysfunction and implantable cardioverter defibrillator or ischaemic heart disease.
- The hypothesis is, that comprehensive sexual rehabilitation consisting of a psycho-educational component and a physical exercise component including pelvic floor exercise improves sexual function.

### Key messages

- Sexual dysfunction is highly prevalent in cardiovascular patients and a systematic approach seems to be lacking.
- This trial is the first to study the effect of a comprehensive sexual rehabilitation programme in a cardiac population.
- This trial is the first to include pelvic floor exercise in a comprehensive rehabilitation programme in cardiac patients.

### Strengths and limitation of this study

- The study have been designed to meet the criteria for high quality in non-pharmacological randomised clinical with central randomisation, multicentre participation, and blinded assessment and analysis.
- We are aware of the subjective nature of the self-reported primary outcome (International Index of Erectile Function). Accordingly, we will interpret data conservatively.

## BACKGROUND

Sexuality is an important part of people's physical and mental health.<sup>1, 2</sup> Patients with cardiovascular disease have increased prevalence of sexual dysfunction.<sup>3-5</sup> The causes of sexual dysfunction can be related to physical changes due to the disease, mental changes, or adverse reactions to drugs and other interventions.<sup>6, 7</sup> Male sexual dysfunction is divided into sexual interest/desire disorders, ejaculation and orgasmic dysfunctions and erectile dysfunction.<sup>8</sup> The most common disorder is erectile dysfunction, defined as the persistent inability to obtain or maintain an erection which enables satisfying sexual activity.<sup>9</sup> Erectile dysfunction is associated with age, but can also be triggered by both organic and psychogenic conditions and is often related to vascular disease such as diabetes, hypertension, and heart disease.<sup>10</sup> Studies including 33,451 males estimate that erectile dysfunction in varying degrees exists in 52% of all men, and that age is the most common variable associated with erectile dysfunction.<sup>3-5</sup> The probability of complete erectile dysfunction in cardiovascular patients is 39% compared to 10% in the total population when adjusting for age.<sup>3, 4</sup> Physical activity is positively associated with a lower incidence of erectile dysfunction.<sup>5</sup> The prevalence of sexual dysfunction in patients with heart disease ranges from 15% up to 89%.<sup>1, 11-17</sup> Patients with ischaemic heart disease and patients with implantable cardioverter defibrillator, which are two large and growing patient populations, are especially affected.<sup>11, 16, 18-20</sup> Sexual dysfunction has a negative impact on quality of life and well-being in men with cardiovascular disease, and sexual dysfunction is associated with an increase in anxiety and depression.<sup>21-24</sup> The relationship is perceived to be bi-directional, with one element forcing the other.<sup>25, 26</sup>

### Standard treatment

Despite the fact that several international guidelines recommend that health professionals address the topic sexuality in patients with heart disease,<sup>27, 28</sup> this is rarely done in practice.<sup>29, 30</sup> The consensus or practice on how or where patients with heart disease and sexual dysfunction should be treated is lacking, however, some guidelines about prescription of phosphodiesterase5 (PDE5) inhibitors exist.<sup>6</sup> The PDE5 inhibitors have an overall success rate of 50% to 80% of those treated in patients with cardiovascular disease.<sup>6, 31, 32</sup> PDE5 inhibitors are generally safe. Linking PDE5



1  
2  
3  
4 inhibitors to cardiac events, large randomised trials and a meta-analysis suggest that they are not  
5 associated with an increase in myocardial infarction or cardiac events.<sup>6, 32</sup> In patients with heart  
6 disease and no effect of PDE5 inhibitors, or where PDE5 inhibitors are contra-indicated because of  
7 treatment with nitrates, there seems to be no consensus on what treatment should be offered for  
8 sexual dysfunction.  
9  
10  
11  
12

### 13 14 **Non-pharmacological treatment potentials**

15 Non-pharmacological interventions possess potential in reducing sexual dysfunction. Lifestyle  
16 factors such as; cigarette smoking, hyperlipidaemia, and a sedentary lifestyle all predict erectile  
17 dysfunction<sup>4, 5</sup> and these are the same risk factors that predict coronary artery disease. A recent  
18 meta-analysis of six randomised trials with 740 patients with no known heart disease, showed that  
19 life style modifications such as physical exercise and pharmacotherapy for cardiovascular risk  
20 factors were associated with a significant improvement in erectile function.<sup>33</sup> Furthermore, a  
21 randomised trial investigating the effect of exercise training 3 hours per week or more in non-heart  
22 disease patients showed a significant result in improving the person's erectile functioning compared  
23 with controls with no exercise training.<sup>34</sup> We hypothesize that these lifestyle modifications can also  
24 improve sexual dysfunction in patients with already established heart disease. A systematic  
25 literature search showed five randomised clinical trials which examine the effect of physical  
26 exercise on sexual dysfunction.<sup>35-39</sup> Overall, 591 patients with heart disease were included and the  
27 effect was significant in three of the five trials.<sup>37-39</sup> However, the trials are characterised as being of  
28 small sample sizes, using non-validated tools and mainly focusing on the time before patients return  
29 to sexual activity and not on the ability and quality of the sexual performance. Randomised trials  
30 that address the psychological aspects of sexual dysfunction are limited in patients with heart  
31 disease. However, one randomised trial testing the effect of sexual therapy showed some promising  
32 trends when it comes to improving the frequency and quality of sexual activity in male patients post  
33 cardiac event beyond the usual cardiac rehabilitation.<sup>40</sup> However, due to the limited power of the  
34 sample in this trial, it did not allow the detection of significant effects. The role of pelvic floor  
35 exercises as a treatment of erectile dysfunction is not tested on patients with heart disease, but in the  
36 general population 40% to 47% had regained normal erectile function after 3-4 month of training  
37 the pelvic floor muscles.<sup>41, 42</sup> As the condition sexual dysfunction often includes both physical and  
38 psychological components, it is plausible to believe that patients with heart disease and sexual  
39  
40  
41  
42  
43  
44  
45  
46  
47  
48  
49  
50  
51  
52  
53  
54  
55  
56  
57  
58  
59  
60

1  
2  
3  
4 dysfunction benefit from a comprehensive rehabilitation intervention<sup>43, 44</sup> consisting of a psycho-  
5 educational component and an exercise training component including pelvic floor exercises.  
6  
7  
8  
9

## 10 TRIAL OBJECTIVES

11  
12 The objective of the CopenHeart<sub>SF</sub> is to investigate benefit and harm on the sexual function of male  
13 patients with ischaemic heart disease or patients with implantable cardioverter defibrillator of a  
14 comprehensive sexual rehabilitation programme, consisting of a psycho-educative component and a  
15 physical exercise component, including pelvic floor exercises. The primary hypothesis is that, a  
16 comprehensive sexual rehabilitation programme improves sexual function, as assessed by the  
17 International Index of Erectile dysfunction (IIEF) questionnaire<sup>45, 46</sup>, in males with sexual  
18 dysfunction and ischaemic heart disease or patients with implantable cardioverter by 3.5 points in  
19 the experimental group compared with the control group after completion of the programme. The  
20 estimated increase in primary outcome is based on a study that examines the effect of a physical  
21 intervention in patients with cardiovascular disease taking PDE5-inhibitors.<sup>34</sup> The secondary  
22 hypothesis is that sexual function, measured by the sexual domain in the Psychosocial Adjustment  
23 to Illness Scale (self-reported version) (PAIS-SR) questionnaire<sup>47</sup>, improves by two points in the  
24 experimental group compared with the control group after completing the programme. The  
25 estimated increase in secondary outcome is based on two studies that examine the prevalence of  
26 sexual dysfunction in patients with heart failure.<sup>48, 49</sup>  
27  
28  
29

30 Exploratory analyses will test the hypotheses that comprehensive sexual rehabilitation will improve:  
31 health-related quality of life, anxiety and depression, frequency of sexual activity, physical capacity  
32 measured by peak oxygen uptake (peak VO<sub>2</sub>), pelvic floor muscle strength and endurance and  
33 female assessment of male partner's erectile dysfunction.  
34  
35  
36  
37  
38  
39

## 40 METHODS

41 CopenHeart<sub>SF</sub> is an investigator-initiated randomised clinical superiority trial with blinded outcome  
42 assessment, with 1:1 central randomisation to a comprehensive sexual rehabilitation programme  
43 plus usual care or usual care alone. Based on sample-size calculations 154 patients will be recruited  
44 from two university hospitals in Denmark. The CopenHeart<sub>SF</sub> trial is a part of the overall  
45 CopenHeart project, consisting of several randomised clinical trials ([www.CopenHeart.org](http://www.CopenHeart.org)),  
46  
47  
48  
49  
50  
51  
52  
53  
54  
55  
56  
57  
58  
59  
60

1  
2  
3  
4 designed to develop evidence-based knowledge of rehabilitation among patients with complex  
5 cardiac conditions. Major parts of the CopenHeart<sub>SF</sub> methods section and trial design in this paper  
6 are similar to other randomised clinical trials, CopenHeart<sub>IE</sub><sup>50</sup>, CopenHeart<sub>RFA</sub><sup>51</sup> and CopenHeart<sub>VR</sub><sup>52</sup>.

### 7 8 9 10 **Study population and eligibility criteria**

11 Male patients above 18 years with sexual dysfunction associated with implantable cardioverter  
12 defibrillator or with ischaemic heart disease verified by coronary angiography, who have a partner,  
13 speak and understand Danish, and provide a written informed consent, are considered eligible for  
14 participation. Exclusion criteria are patients at intermediate or high risk in relation to their  
15 cardiovascular status according to recommendations from the Princeton consensus group<sup>32, 53</sup>; those  
16 with diseases in the urinary tract; those who perform intense competitive exercise more than 3 hours  
17 a week; patients with neurological or orthopaedic deficits which prevent training; patients with  
18 cognitive deficits which prevents consultations; and patients who are included in ongoing research  
19 prohibiting additional research participation. A diagram showing the flow of participants through  
20 each stage of the randomized trial will be made. (*See figure 1*)  
21  
22  
23  
24  
25  
26  
27  
28  
29

### 30 **Experimental intervention**

31 The experimental intervention is a comprehensive sexual rehabilitation programme. Sexual  
32 rehabilitation in this trial is defined as: a time-bounded planned process with clear goals and means.  
33 Sexual rehabilitation is a process where several actors, including the patient, are working towards  
34 regaining improved sexual functioning and coping ability according to their sexual function. The  
35 comprehensive sexual rehabilitation programme contains a physical exercise component, including  
36 training of the pelvic floor and a psycho-educational component.  
37  
38  
39  
40  
41  
42  
43

### 44 **The physical components**

#### 45 *Physical exercise*

46 The goal of physical exercise is to achieve an improvement in the patient's physical work capacity,  
47 and to eliminate the fear and uncertainty the patient may feel in relation to sexual activity as a form  
48 of physical activity. The physical exercise intervention is based on The European Society of  
49 Cardiology recommendations for physical activity for cardiovascular patients.<sup>54</sup> The European  
50 Society of Cardiology recommends that all adults promote and maintain their fitness, muscle  
51 strength, flexibility and bone health several hours a week. Training must be of high intensity and of  
52  
53  
54  
55  
56  
57  
58  
59  
60

1  
2  
3  
4 30 minutes duration.<sup>54</sup> Furthermore, the intervention is supported by European recommendations  
5 for physical training in cardiac patients<sup>55</sup> and has been tested in COPE-ICD and DANREHAB  
6 trials.<sup>56, 57</sup> A professional physiotherapist with specific knowledge of cardiac rehabilitation initiates  
7 the physical exercise programme. Together with the patient, the physiotherapist plans and prepares  
8 a physical exercise protocol, taking into account the patient's clinical condition and physical  
9 abilities. Sixty minutes is allocated for the initial consultation and preparation of individual training  
10 protocol, including pelvic floor exercise instructions.

11  
12  
13  
14  
15  
16  
17 Physical exercise is initiated at a physiotherapist-supervised setting at the Heart Centre,  
18 Rigshospitalet. Using wireless electrodes integrated into t-shirts (Corus-Fit, CardioCardio and  
19 Corus Exercise Assistant, version 2.0.16, Finland) potential cardiac arrhythmias,  
20 electrocardiographic abnormalities such as ST segment changes, T-wave alterations, atrial or  
21 ventricular arrhythmias, and training intensity level are monitored. The training is initiated with two  
22 to three mandatory exercise sessions at Rigshospitalet. Subsequently, the patients can choose to  
23 continue the intensive physical exercise regimen either at Rigshospitalet, or at a local CopenHeart-  
24 certified facility, supervised by physiotherapists, or as supervised home-based training. Supervised  
25 home-based physical training has previously shown similar results to hospital-based training.<sup>58</sup> This  
26 finding has been confirmed in a Danish setting.<sup>59</sup>

27  
28  
29  
30  
31  
32  
33 One session is structured with 10 minutes (min) warm-up bicycling, 20 min bicycling with  
34 increased intensity (cardiovascular training), 20 min strength exercises, and 10 min stretching and  
35 cool-down period. The warm-up session is performed at the intensity of 11 to 12 on the Borg  
36 scale.<sup>60</sup> The 20 min cardiovascular training is performed as interval training. Each session is divided  
37 into three sections. Each section contains intensity 13 to 17 on the Borg scale and time limit (2 to 15  
38 min) varying between each section; the second section with longest and highest intensity. A cool  
39 down period of 5 min is included after the 20 min of cardiovascular training. The strength and  
40 strength-related exercises primarily target lower body muscles, and comprise the following four  
41 exercises: (1) heel rise performed by repetitions of maximal flexion from standing position; (2)  
42 step-up by using a step bench of 27 cm; (3) leg press standardised, starting with 90 degrees flexion,  
43 hyperextension not accepted; (4) 90 degrees pull-down performed in a cable machine to target  
44 abdominal muscles. For step-ups and heel-rises, weight load is calculated as a percentage of body  
45 weight (5 to 20%) and increased throughout the 12 weeks. Load for leg press is estimated from  
46 repetition maximum (RM) testing and increases from 60% of 1 RM to 70% of 1 RM during the 12  
47  
48  
49  
50  
51  
52  
53  
54  
55  
56  
57  
58  
59  
60

1  
2  
3  
4 weeks of training. All exercises are initiated by 2x12 repetitions and increased through the  
5 programme according to standard guidelines for strength training.<sup>61</sup>

6  
7 To achieve cardiovascular adjustment the training begins with a warming-up period and ends with a  
8 cool-down period. This cardiovascular adjustment has been shown to reduce the risk of ischaemia  
9 and arrhythmia in connection to physical exercise.<sup>44, 62</sup> Participants must mainly exercise in an  
10 upright position to decrease left ventricular filling pressure and risk of ischaemia or heart-failure-  
11 triggered ventricular arrhythmias.<sup>62</sup>  
12  
13  
14  
15

### 16 17 *Pelvic floor exercise*

18 The bulbocavernosus muscle and the ischiocavernosus muscle, two superficial pelvic floor muscles,  
19 are active during erection and enhance rigidity. The bulbocavernosus muscle encircles 33% to 50%  
20 of the base of the penis.<sup>41</sup> The pelvic floor training regimen is inspired by Dorey and colleagues,  
21 who have developed a training regimen for male patients for use in randomised clinical trials.<sup>63</sup> The  
22 regiment is developed and tested in a different patient population, and we have therefore modified it  
23 to fit cardiovascular patients. Patients are instructed in pelvic floor exercises by a skilled  
24 physiotherapist. Patients are instructed to perform their pelvic floor exercises twice daily. Studies  
25 showed that a few strong or maximum contractions are more effective when it comes to gaining  
26 muscle hypertrophy than several less strong contractions.<sup>63</sup> Patients are instructed to tighten their  
27 pelvic floor muscles as strongly as possible (as if to prevent flatus from escaping) three times when  
28 lying, three times when sitting, and three times when standing. The duration of the contraction is up  
29 to 10 seconds each, and patients are informed to have a 10 second break between each contraction.  
30 The physiotherapist instructs the patients on how to contract the bulbocavernosus and  
31 ischiocavernosus muscles. In order to ensure that the right muscles are involved, attention is placed  
32 on the ability to lift the scrotum and retract the penis. To obtain some degree of pelvic floor muscle  
33 endurance, the patients are encouraged to tighten the pelvic floor muscles when walking.  
34  
35  
36  
37  
38  
39  
40  
41  
42  
43  
44  
45

46 To [encourage adherence and](#) monitor compliance pulse watches (Polar watch) with extended  
47 memory and exercise training logs are handed out. A training log contains information about  
48 physical exercise as well as pelvic floor exercise. At the end of the intervention the training log and  
49 the pulse watch are returned and compliance and intensity level are coded independently.  
50  
51  
52  
53

### 54 **The psycho-educational components**

55  
56  
57  
58  
59  
60

1  
2  
3  
4 The goal of the psycho-educative intervention is that the patient learns to interpret and react to  
5 relevant physical and psychological symptoms, learns to cope with anxiety and fear, including  
6 strategies to manage depressive symptoms and ability to be sexually active without fear.  
7  
8 A specially trained nurse is responsible for the psycho-educative intervention. The intervention  
9 takes a theoretical basis of the patient-centred approach where the emphasis is on support and  
10 education. The conversations are based on a holistic view of the patient and focus on the handling  
11 of life and managing sexual dysfunction. The intervention is targeted at the modifiable parameters  
12 that are reported to affect sexual dysfunction. The psycho-educative intervention is inspired by RR  
13 Parse's 'Human Becoming Practice Methodologies' three dimensions<sup>64</sup>, which can be described as:  
14 1. discuss and give meaning to the past, present and future, 2. explore and discuss events and  
15 opportunities; and 3. pursue imagined possibilities. According to this theory, there are three ways to  
16 alter its perceived health: creative ideas, see, hear and feel how a situation could be if it was lived in  
17 a different way; recognising personal patterns and value priorities and shed light on the paradoxes  
18 by looking at incongruence in a situation and change the view of reality. The nurse is 'truly present'  
19 in the process through discussion, quiet contemplation, and reflection. The psycho-educative  
20 intervention plus physical exercise was tested in the COPE-ICD trial, with positive effects on  
21 psychological well-being (mental health) and the general health sub-scale of the SF-36.<sup>56</sup> The nurse  
22 is trained in the psycho-educative conversation through teaching and supervision of nurses who  
23 have experience with the 'Human Becoming Practice Methodology' from the COPE-ICD trial. It is  
24 based on the theoretical literature that forms the basis for understanding the processes of practice  
25 methodology and existing specialty specific knowledge about heart disease, related symptoms, and  
26 sexology. The supervisor observes and provides feedback in relation to the methods and goals of the  
27 conversation. The emphasis is on openness in the interviews, and on the nurse's ability to: be  
28 silently present while the patient talks, ask questions that encourage reflection, let the patient find  
29 answers and solutions and contribute with knowledge, provide advice and guidance when requested  
30 and relevant. The training of the nurse takes place prior to the intervention. In practice the  
31 intervention will be handled by one nurse with several years of experience working with cardiac  
32 patients and trained in sexology. The sexology experience is gained in a two-week intensive course  
33 on basic and clinical sexology including training in sexual therapy. Supervision from a sexologist is  
34 available during the intervention. The nurse will conduct consultations with patients individually,  
35 and patients are informed that they are welcome to bring spouses/relatives. The consultation will  
36 take place in a quiet room in an outpatient settings and last for 45 minutes. An inspirational guide  
37  
38  
39  
40  
41  
42  
43  
44  
45  
46  
47  
48  
49  
50  
51  
52  
53  
54  
55  
56  
57  
58  
59  
60

1  
2  
3  
4 will form the basis for the consultations. The guide consists of several elements and issues (medical,  
5 psychosocial, educational and sexual) that work as inspiration (see table 1):  
6  
7  
8  
9  
10  
11  
12  
13  
14  
15  
16  
17  
18

19 **Table 1. Inspiration guide for psycho-educational consultations**

|                                                                                    |
|------------------------------------------------------------------------------------|
| 20 A brief medical history                                                         |
| 21 Actual thoughts and questions regarding their heart disease and sexual function |
| 22 Sexual dysfunction                                                              |
| 23 Safety issues                                                                   |
| 24 Angina or ICD shock                                                             |
| 25 How the sexual problems affect daily live                                       |
| 26 Provide the patient with recommendations                                        |
| 27 Relationship                                                                    |
| 28                                                                                 |
| 29                                                                                 |
| 30                                                                                 |
| 31                                                                                 |
| 32                                                                                 |
| 33                                                                                 |
| 34                                                                                 |
| 35                                                                                 |
| 36                                                                                 |
| 37                                                                                 |
| 38                                                                                 |
| 39                                                                                 |
| 40                                                                                 |
| 41                                                                                 |
| 42                                                                                 |
| 43                                                                                 |
| 44                                                                                 |
| 45                                                                                 |
| 46                                                                                 |
| 47                                                                                 |
| 48                                                                                 |
| 49                                                                                 |
| 50                                                                                 |
| 51                                                                                 |
| 52                                                                                 |
| 53                                                                                 |
| 54                                                                                 |
| 55                                                                                 |
| 56                                                                                 |
| 57                                                                                 |
| 58                                                                                 |
| 59                                                                                 |
| 60                                                                                 |

### Usual care

Participants in the experimental group and in the control group will receive the usual care according to current guidelines. Usual care is, for patients for whom it is not contraindicated, treatment with PDE5 inhibitors. Patients who are candidates for PDE5 inhibitors are encouraged to contact their general practitioner in order to establish the treatment. Use of PDE5 inhibitors will be monitored in both intervention groups. To assess outcome measures, patients in the control group will be asked to complete questionnaires on equal terms with participants in the experimental group. In addition, they will be tested in the form of cardiopulmonary testing (peak VO<sub>2</sub>) and pelvic floor muscle strength and endurance at baseline and at the end of the trial.

### Outcomes and data collection

1  
2  
3  
4 In order to evaluate the effect of comprehensive sexual rehabilitation programme numerous data  
5 will be collected.  
6

7  
8 *Primary outcome*  
9

10 Sexual function will be measured by the International Index of Erectile Function (IIEF)  
11 questionnaire after 16 weeks and 6 months. International Index of Erectile Function (IIEF) was  
12 developed in conjunction with the clinical trial program for sildenafil, and has since been adopted as  
13 the 'gold standard' measure for efficacy assessment in clinical trials of erectile dysfunction. It has  
14 been linguistically validated in 32 languages including Danish and used as a primary outcome in  
15 more than 50 clinical trials.<sup>34, 45, 46</sup> It consists of 15 items including five domains of sexual function:  
16 erectile function, orgasmic function, sexual desire, intercourse satisfaction, and overall satisfaction.  
17 The IIEF meets psychometric criteria for test reliability and validity, and has a high degree of  
18 sensitivity and specificity.<sup>46</sup> The IIEF is self-assessed, which in sexological research is widely used  
19 and well acclaimed.  
20  
21  
22  
23  
24  
25  
26  
27

28  
29 *Secondary outcome*  
30

31 Sexual function is measured by the Psychosocial Adjustment to Illness Scale (self-reported version)  
32 (PAIS-SR) sexual relationship domain.<sup>47</sup> The overall PAIS-SR measure psychosocial adjustment to  
33 illness in terms of 7 primary domains of adjustment: Health Care Orientation, Vocational  
34 Environment, Domestic Environment, Sexual Relationships, Extended Family Relationships, Social  
35 Environment and Psychological Distress. Each PAIS/PAIS-SR item is rated on a 4-point (0 through  
36 3) scale of adjustment, with higher ratings indicating poorer adjustment status. The sexual  
37 relationship domain evaluates shifts in the quality of sexual relations due to the current illness or  
38 treatment. It consists of six items and the total score ranges from 0 to 18. Low scores indicates good  
39 adjustment, and high scores poor adjustment.  
40  
41  
42  
43  
44  
45  
46  
47

48 *Exploratory outcomes*  
49

50 A more extensive evaluation of physical, psychological, and demographic status over time will be  
51 performed. Physical examination will include pelvic floor strength and endurance assessed  
52 according to the Modified Oxford grading scheme which is a manual digital examination of the  
53 pelvic floor. It is tested and validated and used in several trials.<sup>65, 66</sup> Furthermore physical capacity  
54  
55  
56  
57  
58  
59  
60



will be measured by peak VO<sub>2</sub> using cardiopulmonary exercise testing (Ergo-Spiro CS-200, Schiller, Switzerland) with measurement of oxygen uptake (VO<sub>2</sub>), heart rate (HR, beats /min), ventilation rate (VE, l/min), ventilation frequency (VF, number / min), respiratory expiration ratio (RER, CO<sub>2</sub>/O<sub>2</sub> in%), blood pressure, physical activity level (METS) and gas exchange (VO<sub>2</sub> and VCO<sub>2</sub>) during progressive loading and in the following recovery period. The test is conducted before the training programme initiates. Intensity performed as a ramp protocol (load gradually increases) with the initial work load of 25W and increased by 12.5W every minute until exhaustion, usually but not always, is where the patient's oxygen uptake reaches steady state despite additional load. The test follows current standards for cardiopulmonary exercise testing.<sup>67</sup> The full test procedure is described by Rasmussen et al.<sup>50</sup> Additionally a series of questionnaires, regarding health related quality of life, anxiety and depression and sexual dysfunction are administered. (see table 2)

**Table 2 CopenHeart<sub>SF</sub> - Exploratory quantities subjected to post hoc analysis**

| Quantity                                                                                                                           | Time of measure        | Type of quantity |
|------------------------------------------------------------------------------------------------------------------------------------|------------------------|------------------|
| <b>Demographic</b>                                                                                                                 |                        |                  |
| Age, height, weight                                                                                                                | Baseline               | Continuous       |
| Marital, educational, occupational status                                                                                          | Baseline               | Categorical      |
| Smoking                                                                                                                            | Baseline               | Binary (Y/N)     |
| <b>Clinical</b>                                                                                                                    |                        |                  |
| Nutritional status (BMI)                                                                                                           | Baseline               | Continuous       |
| NYHA classification                                                                                                                | Baseline               | Continuous       |
| Type of heart disease                                                                                                              | Baseline               | Categorical      |
| Type of sexual dysfunction                                                                                                         | Baseline               | Categorical      |
| Diabetes mellitus                                                                                                                  | Baseline               | Binary (Y/N)     |
| Level of physical activity                                                                                                         | Baseline               | Categorical      |
| Level of rehabilitation offered                                                                                                    | Baseline               | Categorical      |
| PDE-5 inhibitor intake, Level of activity within the last 4 weeks, Level of sexual activity                                        | Baseline, W12, W16, M6 | Categorical      |
| <b>Para clinical</b>                                                                                                               |                        |                  |
| Cholesterol level                                                                                                                  | Baseline               | Continuous       |
| <b>Functional capacity</b>                                                                                                         |                        |                  |
| Peak VO <sub>2</sub>                                                                                                               | Baseline, W12          | Continuous       |
| Pelvic floor strength and endurance                                                                                                | Baseline, W12          | Continuous       |
| <b>Serious adverse events</b>                                                                                                      | W12, W16, M6           | Continuous       |
| <b>Questionnaires</b>                                                                                                              |                        |                  |
| SF-36 <sup>68</sup> , HADS <sup>69</sup> , EQ-5D-5L <sup>70</sup> , FAME <sup>71</sup> , Sex after ICD questionnaire <sup>16</sup> | Baseline, W16, M6      | Continuous       |

BMI, body mass index; SF-36, Short Form-36; HADS, Hospital Anxiety and Depression Scale; Eq-5D-5L, EuroQol; FAME, Female assessment of male erectile function,

### **Blinding**

It is not possible to blind the allocated intervention group for the staff and the participants.<sup>72</sup> All physical testing, data collection and administration will be conducted by blinded staff, however. Statistical analyses and drawing of conclusions from these will also be conducted blinded to the intervention group.

### **Sample size and power calculations**

We are planning a trial of the continuous response variable IIEF<sup>45, 46</sup> from independent control and experimental participants with one control per experimental participant. In a previous trial the IIEF within each participant group was normally distributed with a standard deviation of 6 points.<sup>34</sup> If the true difference in the experimental and control means is 3.5 points, we will need to include 77 experimental participants and 77 control participants (total 154 participants) to obtain a power of 95% (beta = 5%) and a type 1 error probability of 5%. Using this sample size, a standard deviation of 4 points and an alternative hypothesis of a mean difference of 2 points for the secondary outcome and a type 1 error probability of 5% the corresponding power for the secondary outcome is found to be 87%.

### **Study procedure and randomisation**

To achieve our estimated sample size of 154 participants, patients will be identified from the hospital databases. Patients will be selected consecutively. Patients with an implantable cardioverter defibrillator are required to have the device implanted more than one year prior to inclusion and patients with ischaemic heart disease one year from event and backward. The one year limit has been set so that patients are past their rehabilitation if any is provided. Patients will receive the International Index of Erectile Function questionnaire<sup>45</sup> by mail including a stamped return envelope. Patients with a score less than or equal to 25, the accepted cut-off score<sup>46</sup>, on the initial screening are invited to attend a preliminary interview with the offer to participate in a randomised clinical trial targeting sexual problems. The participant information is sent to the patient along with the invitation. This gives the patient an opportunity to read the material in advance and to prepare

possible questions. At the initial interview/meeting it is determined whether the patient meets the criteria for participating in the trial. If patients are suited and want to participate they will be randomised to either a comprehensive sexual rehabilitation programme plus usual care versus usual care alone. Stratification will be according to patient group (patients with ischaemic heart disease or implantable cardioverter defibrillator) and age ( $\leq 59$  years or  $\geq 60$  years and randomised 1:1 to the experimental group or the control group. Randomisation will be performed centrally by the trial coordination centre, Copenhagen Trial Unit, according to a computer-generated allocation sequence with a variable block size concealed from the investigators. Allocation to the intervention groups is done when the investigator calls Copenhagen Trial Unit. Relevant information (personal identification number, strata, etc.) is typed into a computer system, and then the participant will be allocated to an intervention group and awarded a four-digit randomisation number. The investigator then informs the patient of the result and on how to proceed by letter. Thus, neither investigators nor patients or relatives can influence to which group the patient are allocated. For both groups, follow-up assessment will take place after 12 weeks (only physical evaluation), 16 weeks, and 6 months. Questionnaires will be completed electronically in the questionnaire system Enalyzer with 'single user', which meets the data legislation for logging. At inclusion, the trial participant will receive an email with a link to a website through which questionnaires can be completed. The email contains a login and password for the trial participant's personal access. The participant has the opportunity to go through the website [www.copenheart.org](http://www.copenheart.org) and login with the log-in and password. If patients do not complete the questionnaire electronically, the material can be sent in paper form and independent trial personnel then enters the responses into the database. Thus data management is handled independently from the researchers who interpret the data. All data are stored electronically in a coded database, and in an independent spread sheet, only accessible for the CopenHeart group. The recruitment process will continue until the number of 154 has been reached.

## Statistical analysis

### *Analysis of primary and secondary outcomes*

The analysis will be performed according to the intention-to-treat analysis with two sided significance tests at the 0.05 level. Both outcomes (and outcomes subjected to exploratory analyses) will be analysed using the same procedure. First, we will test if there is an immediate effect of the intervention on the outcome and/or a difference in the response to the intervention between the two patient groups (patients with ischaemic heart disease and patients with implantable cardioverter

defibrillator) using model 1 below. Then the follow-up data will be included in the analysis and the long-term effect will be studied using model 2.

### *Models and analytical techniques*

*Model 1* The equation (equation 1) showing the dependent variable Y (the outcome) as a function of covariates used in the analysis of the immediate effect of the intervention on the primary outcome is  $Y = \text{intercept} + a \cdot Y_{\text{baseline}} + b \cdot I + c \cdot G + d \cdot I \cdot G$  (equation 1).

$Y_{\text{baseline}}$  is the baseline value of the outcome, I is the indicator of intervention, G is the indicator of patient group, and a through d are coefficients to be estimated. The term  $d \cdot I \cdot G$  stands for interaction between the two covariates I and G. If the term  $b \cdot I$  is significant (the coefficient b differs significantly from 0) there is an effect of the intervention common for the two patient groups (ischaemic patients and patients with implantable cardioverter defibrillator). If the term  $d \cdot I \cdot G$  is significant there is an additional effect of the intervention in one of the two patient groups; thus a sub-group analysis is warranted. In the analysis of the data the univariate general linear model is used. The analysis of the primary outcome is the primary analysis. The sub-group analysis and the analysis of the secondary and of other outcomes should be considered exploratory.

*Model 2* In the analysis of follow up data the time T (Y is measured 16 weeks and 6 month following randomisation) is included and the mixed model for repeated measures is used. The equation (equation 2) for the fixed effect in this model showing Y as a function of the co-variates is  $Y = \text{intercept} + a \cdot Y_{\text{baseline}} + b \cdot G + c \cdot I + d \cdot I \cdot G + e \cdot T + f \cdot I \cdot T + g \cdot I \cdot T \cdot G$  (equation 2) where a through g are coefficients to be estimated. If the term  $e \cdot T$  is significant there is a linear trend over time common for both patient groups. If  $f \cdot I \cdot T$  is significant, this trend is supplemented by an additional trend caused by the intervention and therefore specific for the intervention group. If in addition  $g \cdot I \cdot T \cdot G$  is significant this added trend differs between the two patient groups (patients with ischaemic heart disease and patients with implantable cardioverter defibrillator). In the mixed model analysis an unstructured covariance matrix will be assumed. If convergence is not attained simpler covariance structure models will be assessed guided by Akaike's criterion or maximum likelihood test as appropriate.

### *Missing values*

1  
2  
3  
4 If the number of missing cases for a given outcome (number of patients with one or more model  
5 variables missing) is larger than 5% or p of Little's test is < 5% multiple imputations of the model  
6 variables (outcome plus co-variables) is done using SPSS version 17. The range of potential bias in  
7 case the missing values should not be random is assessed by doing two imputations (1) imputing  
8 missing outcome value in one group by minimum value found in the material and missing outcome  
9 value in the other group by maximum value found in material and (2) vice versa. Then in each case  
10 an unadjusted analysis is done to estimate the parameter of interest.  
11  
12  
13  
14  
15  
16

### 17 **ETHICS AND DISSEMINATION**

18  
19 Trial protocol has been approved by the Regional Ethics Committee (no H-4-2012-168) and the  
20 Danish Data Protection Agency (no 2007-58-0015). The trial complies with the latest declaration of  
21 Helsinki and is registered at ClinicalTrials.gov (NCT01796353). Patients are informed about the  
22 trial in writing as well as verbally and only included if a written informed consent is obtained.  
23  
24 Patients are assessed in accordance to whether it is safe for them to perform sexual activity. This is  
25 done according to recommendations from the Princeton consensus group.<sup>32, 53</sup> If patients are suited  
26 and want to participate they will be enrolled in the trial. Trial participants are free to withdraw their  
27 informed consent at any time and be treated according to the departments' standard treatment  
28 procedures. A patient will be withdrawn from the trial if the trial participant withdraws his consent  
29 and will, in connection therewith, be informed that termination of the trial will have no implications  
30 for his future treatment. Patients who leave the trial will be politely asked for permission to  
31 continue to collect data and to use already collected data. If the patient gives permission, he will be  
32 included in the final analysis. Only if the patient refuses use of already collected data, will all data  
33 relating to him, be destroyed. All patient data will be handled and stored in accordance with Danish  
34 Data Protection Agency rules and patients are ensured anonymity. The trial will be conducted  
35 according to the Act. No. 593 of June 14 2011 on Act on Research Ethics Review of Health  
36 Research Projects. The investigator will immediately notify the regional ethics committee if, within  
37 the interventions period, there occur Serious Adverse Events, Serious Adverse Reactions, or  
38 Suspected Unexpected Serious Adverse Reactions. The report will be accompanied by comments  
39 on possible implications for the trial, and notification will be made within 7 days after the  
40 investigator has knowledge of the event. [The trial has no data monitoring committee however an An](#)  
41  
42  
43  
44  
45  
46  
47  
48  
49  
50  
51  
52  
53  
54  
55  
56  
57  
58  
59  
60  
61  
62  
63  
64  
65  
66  
67  
68  
69  
70  
71  
72  
73  
74  
75  
76  
77  
78  
79  
80  
81  
82  
83  
84  
85  
86  
87  
88  
89  
90  
91  
92  
93  
94  
95  
96  
97  
98  
99  
100  
101  
102  
103  
104  
105  
106  
107  
108  
109  
110  
111  
112  
113  
114  
115  
116  
117  
118  
119  
120  
121  
122  
123  
124  
125  
126  
127  
128  
129  
130  
131  
132  
133  
134  
135  
136  
137  
138  
139  
140  
141  
142  
143  
144  
145  
146  
147  
148  
149  
150  
151  
152  
153  
154  
155  
156  
157  
158  
159  
160  
161  
162  
163  
164  
165  
166  
167  
168  
169  
170  
171  
172  
173  
174  
175  
176  
177  
178  
179  
180  
181  
182  
183  
184  
185  
186  
187  
188  
189  
190  
191  
192  
193  
194  
195  
196  
197  
198  
199  
200  
201  
202  
203  
204  
205  
206  
207  
208  
209  
210  
211  
212  
213  
214  
215  
216  
217  
218  
219  
220  
221  
222  
223  
224  
225  
226  
227  
228  
229  
230  
231  
232  
233  
234  
235  
236  
237  
238  
239  
240  
241  
242  
243  
244  
245  
246  
247  
248  
249  
250  
251  
252  
253  
254  
255  
256  
257  
258  
259  
260  
261  
262  
263  
264  
265  
266  
267  
268  
269  
270  
271  
272  
273  
274  
275  
276  
277  
278  
279  
280  
281  
282  
283  
284  
285  
286  
287  
288  
289  
290  
291  
292  
293  
294  
295  
296  
297  
298  
299  
300  
301  
302  
303  
304  
305  
306  
307  
308  
309  
310  
311  
312  
313  
314  
315  
316  
317  
318  
319  
320  
321  
322  
323  
324  
325  
326  
327  
328  
329  
330  
331  
332  
333  
334  
335  
336  
337  
338  
339  
340  
341  
342  
343  
344  
345  
346  
347  
348  
349  
350  
351  
352  
353  
354  
355  
356  
357  
358  
359  
360  
361  
362  
363  
364  
365  
366  
367  
368  
369  
370  
371  
372  
373  
374  
375  
376  
377  
378  
379  
380  
381  
382  
383  
384  
385  
386  
387  
388  
389  
390  
391  
392  
393  
394  
395  
396  
397  
398  
399  
400  
401  
402  
403  
404  
405  
406  
407  
408  
409  
410  
411  
412  
413  
414  
415  
416  
417  
418  
419  
420  
421  
422  
423  
424  
425  
426  
427  
428  
429  
430  
431  
432  
433  
434  
435  
436  
437  
438  
439  
440  
441  
442  
443  
444  
445  
446  
447  
448  
449  
450  
451  
452  
453  
454  
455  
456  
457  
458  
459  
460  
461  
462  
463  
464  
465  
466  
467  
468  
469  
470  
471  
472  
473  
474  
475  
476  
477  
478  
479  
480  
481  
482  
483  
484  
485  
486  
487  
488  
489  
490  
491  
492  
493  
494  
495  
496  
497  
498  
499  
500  
501  
502  
503  
504  
505  
506  
507  
508  
509  
510  
511  
512  
513  
514  
515  
516  
517  
518  
519  
520  
521  
522  
523  
524  
525  
526  
527  
528  
529  
530  
531  
532  
533  
534  
535  
536  
537  
538  
539  
540  
541  
542  
543  
544  
545  
546  
547  
548  
549  
550  
551  
552  
553  
554  
555  
556  
557  
558  
559  
560  
561  
562  
563  
564  
565  
566  
567  
568  
569  
570  
571  
572  
573  
574  
575  
576  
577  
578  
579  
580  
581  
582  
583  
584  
585  
586  
587  
588  
589  
590  
591  
592  
593  
594  
595  
596  
597  
598  
599  
600  
601  
602  
603  
604  
605  
606  
607  
608  
609  
610  
611  
612  
613  
614  
615  
616  
617  
618  
619  
620  
621  
622  
623  
624  
625  
626  
627  
628  
629  
630  
631  
632  
633  
634  
635  
636  
637  
638  
639  
640  
641  
642  
643  
644  
645  
646  
647  
648  
649  
650  
651  
652  
653  
654  
655  
656  
657  
658  
659  
660  
661  
662  
663  
664  
665  
666  
667  
668  
669  
670  
671  
672  
673  
674  
675  
676  
677  
678  
679  
680  
681  
682  
683  
684  
685  
686  
687  
688  
689  
690  
691  
692  
693  
694  
695  
696  
697  
698  
699  
700  
701  
702  
703  
704  
705  
706  
707  
708  
709  
710  
711  
712  
713  
714  
715  
716  
717  
718  
719  
720  
721  
722  
723  
724  
725  
726  
727  
728  
729  
730  
731  
732  
733  
734  
735  
736  
737  
738  
739  
740  
741  
742  
743  
744  
745  
746  
747  
748  
749  
750  
751  
752  
753  
754  
755  
756  
757  
758  
759  
760  
761  
762  
763  
764  
765  
766  
767  
768  
769  
770  
771  
772  
773  
774  
775  
776  
777  
778  
779  
780  
781  
782  
783  
784  
785  
786  
787  
788  
789  
790  
791  
792  
793  
794  
795  
796  
797  
798  
799  
800  
801  
802  
803  
804  
805  
806  
807  
808  
809  
810  
811  
812  
813  
814  
815  
816  
817  
818  
819  
820  
821  
822  
823  
824  
825  
826  
827  
828  
829  
830  
831  
832  
833  
834  
835  
836  
837  
838  
839  
840  
841  
842  
843  
844  
845  
846  
847  
848  
849  
850  
851  
852  
853  
854  
855  
856  
857  
858  
859  
860  
861  
862  
863  
864  
865  
866  
867  
868  
869  
870  
871  
872  
873  
874  
875  
876  
877  
878  
879  
880  
881  
882  
883  
884  
885  
886  
887  
888  
889  
890  
891  
892  
893  
894  
895  
896  
897  
898  
899  
900  
901  
902  
903  
904  
905  
906  
907  
908  
909  
910  
911  
912  
913  
914  
915  
916  
917  
918  
919  
920  
921  
922  
923  
924  
925  
926  
927  
928  
929  
930  
931  
932  
933  
934  
935  
936  
937  
938  
939  
940  
941  
942  
943  
944  
945  
946  
947  
948  
949  
950  
951  
952  
953  
954  
955  
956  
957  
958  
959  
960  
961  
962  
963  
964  
965  
966  
967  
968  
969  
970  
971  
972  
973  
974  
975  
976  
977  
978  
979  
980  
981  
982  
983  
984  
985  
986  
987  
988  
989  
990  
991  
992  
993  
994  
995  
996  
997  
998  
999  
1000

1  
2  
3  
4 there is no previous risk associated with nursing consultations. If the nurse during the consultation  
5 identifies a need for further consultations with professionals, she will encourage the participant to  
6 seek help from the general practitioner, psychologist, or in their usual outpatient setting. Risks  
7 associated with exercise training and testing are sudden cardiac death associated with ventricular  
8 arrhythmias, acute myocardial infarction, and in patients with chronic heart failure, pulmonary  
9 oedema and deterioration in left ventricular function.<sup>73</sup> The last is only found in one study from  
10 1988<sup>74</sup> and has not subsequently been demonstrated in larger studies.<sup>75, 76</sup> In a recent French study  
11 of more than 25,000 patients with ischaemic heart disease, one third with chronic heart failure  
12 found the risk of cardiac complications at 1:8,500 exercise testing and 1:50,000 patient exercise  
13 hours.<sup>77</sup> Increasing exercise intensity and age are risk indicators. Therefore, the training intensity  
14 will be conducted as moderate high intensity (less than 80% of VO<sub>2</sub> max). To achieve  
15 cardiovascular adjustment both exercise training and testing begins with a warming-up period and  
16 ends with a cool-down period, with a gradual downward adjustment of exercise intensity and heart  
17 rate, rather than an abrupt end. This cardiovascular adjustment has been shown to reduce the risk of  
18 ischaemia and arrhythmia in connection with physical exercise.<sup>44, 62</sup> Participants must mainly  
19 exercise in an upright position to decrease left ventricular filling pressure and risk of ischemia or  
20 heart failure triggered ventricular arrhythmias. When these precautions are respected, both exercise  
21 training and exercise testing are considered to possess a low risk for the participants. There is, as far  
22 as we know, no previously known risk associated with pelvic floor exercise. Testing or examination  
23 of the pelvic floor may be associated with discomfort for the participants but is not considered to be  
24 associated with any risk. Staff members will be trained according to guidelines to handle any  
25 emergencies.  
26  
27  
28  
29  
30  
31  
32  
33  
34  
35  
36  
37  
38  
39  
40  
41

### 42 **Dissemination plan**

43  
44 Positive, neutral, and negative results of the trial will be submitted to international peer reviewed  
45 journals of nursing, cardiology or sexology. Furthermore, results will be presented at national and  
46 international conferences relevant to subject fields. Authorship will be allocated using the  
47 guidelines for authorship defined by the International Committee of Medical Journal Editors and  
48 depends on the personal involvement. All the articles, abstracts as well as the results will be posted  
49 on the website [www.copenheart.org](http://www.copenheart.org). The website will be continuously updated and will be  
50 highlighted through the scientific articles. [CopenHeart staff will have access to data. Ethic committees  
51 and competent authorities will be able to obtain direct access to data and documentation.](#)  
52  
53  
54  
55  
56  
57  
58  
59  
60

## DISCUSSION

This randomised clinical trial testing the effect of a comprehensive sexual rehabilitation intervention on a population of patients with implantable cardioverter defibrillator or patients with ischaemic heart disease seems to be the first one in its field. The trial is expected to contribute with results that can improve patients' problems related to heart disease and sexual function.

Additionally, it is believed that the trial can provide a systematic approach that may one day inform national consensus on how to treat sexual dysfunction in heart patients. Furthermore, the results of the trial are expected to contribute to the international debate on sexual rehabilitation of patients with heart disease.

The trial is designed with central stratified randomisation [which secures against selection bias](#)<sup>78, 79</sup>; [The primary outcome is assessed blinded to intervention and so are all statistical analysis, which should reduce detection and interpretation bias](#)<sup>78, 79</sup>; [blinded assessment and analysis of outcomes](#)<sup>78, 79</sup>; [multicentre participation and meets the SPIRIT and CONSORT criteria for high quality in non-pharmacological randomised clinical trials](#).

### Trajectory

Inclusion was initiated February 2013 and is expected to continue until June 2014.

### Acknowledgements:

The test and rehabilitation team responsible for the trial is: Karina Jensen, Lars Tang, Helena Tjalk Sørensen, Signe Gils and Katrine Tingholm Erhardsen.

### Funding statement:

The CopenHeart trial has received funding from: The Danish Heart Foundation (no. 13-04-R95-A4669-22744); The Health Foundation (no. 2013B208 ); Danish Council for Strategic Research (no. 10-092790); The Danish Nursing Council. Neither of the funders had influence of the study protocol and design, the execution of the trial or the interpretation of data.

### Competing interest:

None

**REFERENCES**

1. Hoekstra T, Jaarsma T, Sanderman R, van Veldhuisen DJ, Lesman-Leegte I. Perceived sexual difficulties and associated factors in patients with heart failure. *Am Heart J* 2012; Feb;163(2):246-51.
2. Laumann EO, Paik A, Rosen RC. Sexual dysfunction in the United States: prevalence and predictors. *JAMA* 1999; Feb 10;281(6):537-44.
3. Feldman HA, Goldstein I, Hatzichristou DG, Krane RJ, McKinlay JB. Impotence and its medical and psychosocial correlates: results of the Massachusetts Male Aging Study. *J Urol* 1994; Jan;151(1):54-61.
4. Feldman HA, Johannes CB, Derby CA, Kleinman KP, Mohr BA, Araujo AB, et al. Erectile dysfunction and coronary risk factors: prospective results from the Massachusetts male aging study. *Prev Med* 2000; Apr;30(4):328-38.
5. Bacon CG, Mittleman MA, Kawachi I, Giovannucci E, Glasser DB, Rimm EB. Sexual function in men older than 50 years of age: results from the health professionals follow-up study. *Ann Intern Med* 2003; Aug 5;139(3):161-8.
6. Levine GN, Steinke EE, Bakaeen FG, Bozkurt B, Cheitlin MD, Conti JB, et al. Sexual activity and cardiovascular disease: a scientific statement from the American Heart Association. *Circulation* 2012; Feb 28;125(8):1058-72.
7. Steinke EE. Sexual dysfunction in women with cardiovascular disease: what do we know?. *J Cardiovasc Nurs* 2010; Mar-Apr;25(2):151-8.



- 1  
2  
3  
4 8. Lewis RW, Fugl-Meyer KS, Corona G, Hayes RD, Laumann EO, Moreira ED, Jr, et al.  
5  
6 Definitions/epidemiology/risk factors for sexual dysfunction. *J Sex Med* 2010; Apr;7(4 Pt 2):1598-  
7  
8 607.  
9
- 10  
11 9. NIH Consensus Conference. Impotence. NIH Consensus Development Panel on Impotence.  
12  
13 *JAMA* 1993; Jul 7;270(1):83-90.  
14  
15
- 16  
17 10. Rastogi S, Rodriguez JJ, Kapur V, Schwarz ER. Why do patients with heart failure suffer from  
18  
19 erectile dysfunction? A critical review and suggestions on how to approach this problem. *Int J*  
20  
21 *Impot Res* 2005; Dec;17 Suppl 1:S25-36.  
22  
23
- 24  
25 11. Berg SK, Elleman-Jensen L, Zwisler AD, Winkel P, Svendsen JH, Pedersen PU, et al. Sexual  
26  
27 concerns and practices after ICD implantation: findings of the COPE-ICD rehabilitation trial. *Eur J*  
28  
29 *Cardiovasc Nurs* 2013; Jan 8;.  
30  
31
- 32  
33 12. Bortolotti A, Parazzini F, Colli E, Landoni M. The epidemiology of erectile dysfunction and its  
34  
35 risk factors. *Int J Androl* 1997; Dec;20(6):323-34.  
36  
37
- 38  
39 13. Herbert K, Lopez B, Castellano J, Palacio A, Tamari L, Arcemen LM. The prevalence of  
40  
41 erectile dysfunction in heart failure patients by race and ethnicity. *Int J Impot Res* 2008; Sep-  
42  
43 Oct;20(5):507-11.  
44  
45
- 46  
47 14. Kloner RA, Mullin SH, Shook T, Matthews R, Mayeda G, Burstein S, et al. Erectile dysfunction  
48  
49 in the cardiac patient: how common and should we treat?. *J Urol* 2003; Aug;170(2 Pt 2):S46,50;  
50  
51 discussion S50.  
52  
53
- 54  
55 15. Montorsi F, Briganti A, Salonia A, Rigatti P, Margonato A, Macchi A, et al. Erectile  
56  
57 dysfunction prevalence, time of onset and association with risk factors in 300 consecutive patients  
58  
59  
60

1  
2  
3  
4 with acute chest pain and angiographically documented coronary artery disease. *Eur Urol* 2003;  
5  
6 Sep;44(3):360,4; discussion 364-5.  
7

8  
9  
10 16. Steinke EE. Sexual concerns of patients and partners after an implantable cardioverter  
11  
12 defibrillator. *Dimens Crit Care Nurs* 2003; Mar-Apr;22(2):89-96.  
13

14  
15 17. Dabrowski R, Smolis-Bak E, Kowalik I, Kazimierska B, Wojcicka M, Szwed H. Quality of life  
16  
17 and depression in patients with different patterns of atrial fibrillation. *Kardiol Pol* 2010;  
18  
19 Oct;68(10):1133-9.  
20  
21

22  
23 18. Drory Y, Kravetz S, Weingarten M. Comparison of sexual activity of women and men after a  
24  
25 first acute myocardial infarction. *Am J Cardiol* 2000; Jun 1;85(11):1283-7.  
26  
27

28  
29 19. Foroutan SK, Rajabi M. Erectile dysfunction in men with angiographically documented  
30  
31 coronary artery disease. *Urol J* 2007; Winter;4(1):28-32.  
32  
33

34  
35 20. Justo D, Arbel Y, Mulat B, Mashav N, Saar N, Steinvil A, et al. Sexual activity and erectile  
36  
37 dysfunction in elderly men with angiographically documented coronary artery disease. *Int J Impot*  
38  
39 *Res* 2010; Jan-Feb;22(1):40-4.  
40  
41

42  
43 21. Dunn KM, Croft PR, Hackett GI. Association of sexual problems with social, psychological,  
44  
45 and physical problems in men and women: a cross sectional population survey. *J Epidemiol*  
46  
47 *Community Health* 1999; Mar;53(3):144-8.  
48  
49

50  
51 22. Friedman S. Cardiac disease, anxiety, and sexual functioning. *Am J Cardiol* 2000; Jul  
52  
53 20;86(2A):46F-50F.  
54  
55  
56  
57  
58  
59  
60

- 1  
2  
3  
4 23. Kriston L, Gunzler C, Agyemang A, Bengel J, Berner MM, SPARK Study Group. Effect of  
5  
6 sexual function on health-related quality of life mediated by depressive symptoms in cardiac  
7  
8 rehabilitation. findings of the SPARK project in 493 patients. *J Sex Med* 2010; Jun;7(6):2044-55.  
9
- 10  
11 24. Mulat B, Arbel Y, Mashav N, Saar N, Steinvil A, Heruti R, et al. Depressive symptoms and  
12  
13 erectile dysfunction in men with coronary artery disease. *Urology* 2010; Jan;75(1):104-7.  
14  
15
- 16  
17 25. Makhoulouf A, Kparker A, Niederberger CS. Depression and erectile dysfunction. *Urol Clin*  
18  
19 *North Am* 2007; Nov;34(4):565,74, vii.  
20  
21
- 22  
23 26. Roose SP. Depression: links with ischemic heart disease and erectile dysfunction. *J Clin*  
24  
25 *Psychiatry* 2003;64 Suppl 10:26-30.  
26  
27
- 28  
29 27. Dickstein K, Cohen-Solal A, Filippatos G, McMurray JJ, Ponikowski P, Poole-Wilson PA, et al.  
30  
31 ESC Guidelines for the diagnosis and treatment of acute and chronic heart failure 2008: the Task  
32  
33 Force for the Diagnosis and Treatment of Acute and Chronic Heart Failure 2008 of the European  
34  
35 Society of Cardiology. Developed in collaboration with the Heart Failure Association of the ESC  
36  
37 (HFA) and endorsed by the European Society of Intensive Care Medicine (ESICM). *Eur Heart J*  
38  
39 2008; Oct;29(19):2388-442.  
40  
41
- 42  
43 28. Heart Failure Society Of A. HFSA 2006 Comprehensive Heart Failure Practice Guideline. *J*  
44  
45 *Card Fail* 2006; Feb;12(1):e1-2.  
46  
47
- 48  
49 29. Bedell SE, Duperval M, Goldberg R. Cardiologists' discussions about sexuality with patients  
50  
51 with chronic coronary artery disease. *Am Heart J* 2002; Aug;144(2):239-42.  
52  
53  
54  
55  
56  
57  
58  
59  
60

- 1  
2  
3  
4 30. Jaarsma T, Stromberg A, Fridlund B, De Geest S, Martensson J, Moons P, et al. Sexual  
5  
6 counselling of cardiac patients: nurses' perception of practice, responsibility and confidence. *Eur J*  
7  
8 *Cardiovasc Nurs* 2010; Mar;9(1):24-9.  
9  
10  
11 31. Jackson G, Boon N, Eardley I, Kirby M, Dean J, Hackett G, et al. Erectile dysfunction and  
12  
13 coronary artery disease prediction: evidence-based guidance and consensus. *Int J Clin Pract* 2010;  
14  
15 Jun;64(7):848-57.  
16  
17  
18 32. Jackson G, Rosen RC, Kloner RA, Kostis JB. The second Princeton consensus on sexual  
19  
20 dysfunction and cardiac risk: new guidelines for sexual medicine. *J Sex Med* 2006; Jan;3(1):28,36;  
21  
22 discussion 36.  
23  
24  
25 33. Gupta BP, Murad MH, Clifton MM, Prokop L, Nehra A, Kopecky SL. The effect of lifestyle  
26  
27 modification and cardiovascular risk factor reduction on erectile dysfunction: a systematic review  
28  
29 and meta-analysis. *Arch Intern Med* 2011; Nov 14;171(20):1797-803.  
30  
31  
32  
33 34. Maio G, Saraeb S, Marchiori A. Physical activity and PDE5 inhibitors in the treatment of  
34  
35 erectile dysfunction: results of a randomized controlled study. *J Sex Med* 2010; Jun;7(6):2201-8.  
36  
37  
38  
39 35. Roviario R, Holmes D, Holmsten R. Influence of a Cardiac Rehabilitation Program on the  
40  
41 Cardiovascular, Psychological, and Social Functioning of Cardiac Patients. *J Beh Med*  
42  
43 1984;7(1):61.  
44  
45  
46 36. Froelicher ES, Kee LL, Newton KM, Lindskog B, Livingston M. Return to work, sexual  
47  
48 activity, and other activities after acute myocardial infarction. *Heart Lung* 1994; Sep-  
49  
50 Oct;23(5):423-35.  
51  
52  
53  
54  
55  
56  
57  
58  
59  
60

1  
2  
3  
4 37. Belardinelli R, Lacalaprice F, Faccenda E, Purcaro A, Perna G. Effects of short-term moderate  
5  
6 exercise training on sexual function in male patients with chronic stable heart failure. *Int J Cardiol*  
7  
8 2005; May 11;101(1):83-90.  
9

10  
11 38. Bertie J, King A, Reed N, Marshall AJ, Ricketts C. Benefits and weaknesses of a cardiac  
12  
13 rehabilitation programme. *J R Coll Physicians Lond* 1992; Apr;26(2):147-51.  
14  
15

16  
17 39. Lidell E, Fridlund B. Long-term effects of a comprehensive rehabilitation programme after  
18  
19 myocardial infarction. *Scand J Caring Sci* 1996;10(2):67-74.  
20  
21

22  
23 40. Klein R, Bar-on E, Klein J, Benbenishty R. The impact of sexual therapy on patients after  
24  
25 cardiac events participating in a cardiac rehabilitation program. *Eur J Cardiovasc Prev Rehabil*  
26  
27 2007; Oct;14(5):672-8.  
28  
29

30  
31 41. Dorey G, Speakman MJ, Feneley RC, Swinkels A, Dunn CD. Pelvic floor exercises for erectile  
32  
33 dysfunction. *BJU Int* 2005; Sep;96(4):595-7.  
34  
35

36  
37 42. Van Kampen M, De Weerd W, Claes H, Feys H, De Maeyer M, Van Poppel H. Treatment of  
38  
39 erectile dysfunction by perineal exercise, electromyographic biofeedback, and electrical stimulation.  
40  
41 *Phys Ther* 2003; Jun;83(6):536-43.  
42  
43

44  
45 43. Balady GJ, Williams MA, Ades PA, Bittner V, Comoss P, Foody JA, et al. Core components of  
46  
47 cardiac rehabilitation/secondary prevention programs: 2007 update: a scientific statement from the  
48  
49 American Heart Association Exercise, Cardiac Rehabilitation, and Prevention Committee, the  
50  
51 Council on Clinical Cardiology; the Councils on Cardiovascular Nursing, Epidemiology and  
52  
53 Prevention, and Nutrition, Physical Activity, and Metabolism; and the American Association of  
54  
55  
56  
57  
58  
59  
60

1  
2  
3  
4 Cardiovascular and Pulmonary Rehabilitation. *J Cardiopulm Rehabil Prev* 2007; May-  
5 Jun;27(3):121-9.  
6  
7

8  
9  
10 44. Fitchet A, Doherty PJ, Bundy C, Bell W, Fitzpatrick AP, Garratt CJ. Comprehensive cardiac  
11 rehabilitation programme for implantable cardioverter-defibrillator patients: a randomised  
12 controlled trial. *Heart* 2003; Feb;89(2):155-60.  
13  
14

15  
16  
17 45. Rosen RC, Riley A, Wagner G, Osterloh IH, Kirkpatrick J, Mishra A. The international index of  
18 erectile function (IIEF): a multidimensional scale for assessment of erectile dysfunction. *Urology*  
19  
20 1997; Jun;49(6):822-30.  
21  
22

23  
24  
25 46. Rosen RC, Cappelleri JC, Gendrano N,3rd. The International Index of Erectile Function (IIEF):  
26 a state-of-the-science review. *Int J Impot Res* 2002; Aug;14(4):226-44.  
27  
28

29  
30  
31 47. Derogatis LR. The psychosocial adjustment to illness scale (PAIS). *J Psychosom Res*  
32 1986;30(1):77-91.  
33  
34

35  
36  
37 48. Westlake C, Dracup K, Walden JA, Fonarow G. Sexuality of patients with advanced heart  
38 failure and their spouses or partners. *J Heart Lung Transplant* 1999; Nov;18(11):1133-8.  
39  
40

41  
42 49. Jaarsma T. Sexual problems in heart failure patients. *Eur J Cardiovasc Nurs* 2002; Feb;1(1):61-  
43 7.  
44  
45

46  
47  
48 50. Rasmussen TB, Zwisler AD, Sibilitz KL, Risom SS, Bundgaard H, Glud C, et al. A  
49 randomised clinical trial of comprehensive cardiac rehabilitation versus usual care for patients  
50 treated for infective endocarditis--the CopenHeartIE trial protocol. *BMJ Open* 2012; Nov  
51 21;2(6):10.1136/bmjopen,2012-001929. Print 2012.  
52  
53  
54  
55  
56  
57  
58  
59  
60

1  
2  
3  
4 51. Risom SS, Zwisler AD, Rasmussen TB, Sibilitz KL, Svendsen JH, Gluud C, et al. The effect of  
5  
6 integrated cardiac rehabilitation versus treatment as usual for atrial fibrillation patients treated with  
7  
8 ablation: the randomised CopenHeartRFA trial protocol. *BMJ Open* 2013; Feb  
9  
10 20;3(2):10.1136/bmjopen,2012-002377. Print 2013.

11  
12  
13  
14 52. Sibilitz KL, Berg SK, Hansen TB, Risom SS, Rasmussen TB, Hassager C, et al. Effect of  
15  
16 comprehensive cardiac rehabilitation after heart valve surgery (CopenHeartVR): study protocol for  
17  
18 a randomised clinical trial. *Trials* 2013; Apr 22;14(1):104.

19  
20  
21  
22 53. Nehra A, Jackson G, Miner M, Billups KL, Burnett AL, Buvat J, et al. The Princeton III  
23  
24 Consensus recommendations for the management of erectile dysfunction and cardiovascular  
25  
26 disease. *Mayo Clin Proc* 2012; Aug;87(8):766-78.

27  
28  
29  
30 54. Perk J, De Backer G, Gohlke H, Graham I, Reiner Z, Verschuren WM, et al. European  
31  
32 guidelines on cardiovascular disease prevention in clinical practice (version 2012) : the fifth joint  
33  
34 task force of the European society of cardiology and other societies on cardiovascular disease  
35  
36 prevention in clinical practice (constituted by representatives of nine societies and by invited  
37  
38 experts). *Int J Behav Med* 2012; Dec;19(4):403-88.

39  
40  
41  
42 55. Piepoli MF, Corra U, Benzer W, Bjarnason-Wehrens B, Dendale P, Gaita D, et al. Secondary  
43  
44 prevention through cardiac rehabilitation: from knowledge to implementation. A position paper  
45  
46 from the Cardiac Rehabilitation Section of the European Association of Cardiovascular Prevention  
47  
48 and Rehabilitation. *Eur J Cardiovasc Prev Rehabil* 2010; Feb;17(1):1-17.

49  
50  
51  
52 56. Berg SK. *Comprehensive rehabilitation for patients with ICD: PhD dissertation*. [Aarhus]:  
53  
54 Faculty of Health Sciences, Aarhus University; 2011.

1  
2  
3  
4 57. Zwisler AD, Soja AM, Rasmussen S, Frederiksen M, Abedini S, Appel J, et al. Hospital-based  
5  
6 comprehensive cardiac rehabilitation versus usual care among patients with congestive heart failure,  
7  
8 ischemic heart disease, or high risk of ischemic heart disease: 12-month results of a randomized  
9  
10 clinical trial. *Am Heart J* 2008; Jun;155(6):1106-13.

11  
12  
13  
14 58. Ashworth NL, Chad KE, Harrison EL, Reeder BA, Marshall SC. Home versus center based  
15  
16 physical activity programs in older adults. *Cochrane Database Syst Rev* 2005; Jan  
17  
18 25;(1)(1):CD004017.

19  
20  
21 59. Oerkild B, Frederiksen M, Hansen JF, Simonsen L, Skovgaard LT, Prescott E. Home-based  
22  
23 cardiac rehabilitation is as effective as centre-based cardiac rehabilitation among elderly with  
24  
25 coronary heart disease: results from a randomised clinical trial. *Age Ageing* 2011; Jan;40(1):78-85.

26  
27  
28  
29 60. Borg GA. Psychophysical bases of perceived exertion. *Med Sci Sports Exerc* 1982;14(5):377-  
30  
31 81.

32  
33  
34  
35 61. Williams MA, Haskell WL, Ades PA, Amsterdam EA, Bittner V, Franklin BA, et al. Resistance  
36  
37 exercise in individuals with and without cardiovascular disease: 2007 update: a scientific statement  
38  
39 from the American Heart Association Council on Clinical Cardiology and Council on Nutrition,  
40  
41 Physical Activity, and Metabolism. *Circulation* 2007; Jul 31;116(5):572-84.

42  
43  
44  
45 62. Lampman RM, Knight BP. Prescribing exercise training for patients with defibrillators. *Am J*  
46  
47 *Phys Med Rehabil* 2000; May-Jun;79(3):292-7.

48  
49  
50  
51 63. Dorey G, Glazener C, Buckley B, Cochran C, Moore K. Developing a pelvic floor muscle  
52  
53 training regimen for use in a trial intervention. *Physiotherapy* 2009; Sep;95(3):199-209.



1  
2  
3  
4 64. Parse RR. *The human becoming school of thought: a perspective for nurses and other health*  
5  
6 *professionals*. Thousand Oaks, Calif.: Sage; 1998.  
7

8  
9  
10 65. Tibaek S, Klarskov P, Lund Hansen B, Thomsen H, Andresen H, Schmidt Jensen C, et al.  
11  
12 Pelvic floor muscle training before transurethral resection of the prostate: a randomized, controlled,  
13  
14 blinded study. *Scand J Urol Nephrol* 2007;41(4):329-34.  
15

16  
17 66. Schüssler B. *Pelvic floor re-education: principles and practice*. London: Springer; 1994.  
18

19  
20 67. Mezzani A, Agostoni P, Cohen-Solal A, Corra U, Jegier A, Kouidi E, et al. Standards for the  
21  
22 use of cardiopulmonary exercise testing for the functional evaluation of cardiac patients: a report  
23  
24 from the Exercise Physiology Section of the European Association for Cardiovascular Prevention  
25  
26 and Rehabilitation. *Eur J Cardiovasc Prev Rehabil* 2009; Jun;16(3):249-67.  
27  
28

29  
30 68. Ware JE, Kosinski M, Gandek B. SF-36 Health Survey.: Manual and Interpretation guide  
31  
32 2005;The Health Institute, New England Medical Center, Boston, Massachusetts.  
33

34  
35 69. Zigmond AS, Snaith RP. The hospital anxiety and depression scale. *Acta Psychiatr Scand* 1983;  
36  
37 Jun;67(6):361-70.  
38  
39

40  
41 70. Drummond MF. *Methods for the economic evaluation of health care programmes*. 3rd edition  
42  
43 ed. Oxford: Oxford University Press; 2005.  
44  
45

46  
47 71. Rubio-Aurioles E, Sand M, Terrein-Roccatti N, Dean J, Longworth J, Eardley I, et al. Female  
48  
49 Assessment of Male Erectile dysfunction detection scale (FAME): development and validation. *J*  
50  
51 *Sex Med* 2009; Aug;6(8):2255-70.  
52  
53  
54  
55  
56  
57  
58  
59  
60

1  
2  
3  
4 72. Boutron I, Moher D, Altman DG, Schulz KF, Ravaud P, CONSORT Group. Extending the  
5  
6 CONSORT statement to randomized trials of nonpharmacologic treatment: explanation and  
7  
8 elaboration. *Ann Intern Med* 2008; Feb 19;148(4):295-309.  
9

10  
11 73. Fletcher GF, Balady GJ, Amsterdam EA, Chaitman B, Eckel R, Fleg J, et al. Exercise standards  
12  
13 for testing and training: a statement for healthcare professionals from the American Heart  
14  
15 Association. *Circulation* 2001; Oct 2;104(14):1694-740.  
16  
17

18  
19 74. Jugdutt BI, Michorowski BL, Kappagoda CT. Exercise training after anterior Q wave  
20  
21 myocardial infarction: importance of regional left ventricular function and topography. *J Am Coll*  
22  
23 *Cardiol* 1988; Aug;12(2):362-72.  
24  
25

26  
27 75. Giannuzzi P, Tavazzi L, Temporelli PL, Corra U, Imparato A, Gattone M, et al. Long-term  
28  
29 physical training and left ventricular remodeling after anterior myocardial infarction: results of the  
30  
31 Exercise in Anterior Myocardial Infarction (EAMI) trial. EAMI Study Group. *J Am Coll Cardiol*  
32  
33 1993; Dec;22(7):1821-9.  
34  
35

36  
37 76. Otsuka Y, Takaki H, Okano Y, Satoh T, Aihara N, Matsumoto T, et al. Exercise training  
38  
39 without ventricular remodeling in patients with moderate to severe left ventricular dysfunction early  
40  
41 after acute myocardial infarction. *Int J Cardiol* 2003; Feb;87(2-3):237-44.  
42  
43

44  
45 77. Pavy B, Iliou MC, Meurin P, Tabet JY, Corone S, Functional Evaluation and Cardiac  
46  
47 Rehabilitation Working Group of the French Society of Cardiology. Safety of exercise training for  
48  
49 cardiac patients: results of the French registry of complications during cardiac rehabilitation. *Arch*  
50  
51 *Intern Med* 2006; Nov 27;166(21):2329-34.  
52  
53

1  
2  
3  
4 78. Savovic J, Jones HE, Altman DG, Harris RJ, Juni P, Pildal J, et al. Influence of reported study  
5 design characteristics on intervention effect estimates from randomized, controlled trials. *Ann*  
6  
7  
8 *Intern Med* 2012; Sep 18;157(6):429-38.

9  
10  
11 79. Wood L, Egger M, Gluud LL, Schulz KF, Juni P, Altman DG, et al. Empirical evidence of bias  
12 in treatment effect estimates in controlled trials with different interventions and outcomes: meta-  
13  
14 epidemiological study. *BMJ* 2008; Mar 15;336(7644):601-5.  
15  
16  
17  
18  
19  
20  
21  
22  
23  
24  
25  
26  
27  
28  
29  
30  
31  
32  
33  
34  
35  
36  
37  
38  
39  
40  
41  
42  
43  
44  
45  
46  
47  
48  
49  
50  
51  
52  
53  
54  
55  
56  
57  
58  
59  
60

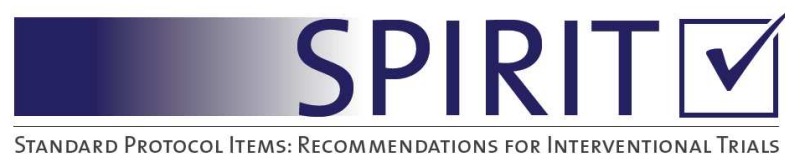

SPIRIT 2013 Checklist: Recommended items to address in a clinical trial protocol and related documents\*

| Section/item                      | Item No | Description                                                                                                                                                                                                                                                                              | Addressed on page number |
|-----------------------------------|---------|------------------------------------------------------------------------------------------------------------------------------------------------------------------------------------------------------------------------------------------------------------------------------------------|--------------------------|
| <b>Administrative information</b> |         |                                                                                                                                                                                                                                                                                          |                          |
| Title                             | 1       | Descriptive title identifying the study design, population, interventions, and, if applicable, trial acronym                                                                                                                                                                             | 1                        |
| 17                                | 2a      | Trial identifier and registry name. If not yet registered, name of intended registry                                                                                                                                                                                                     | 3                        |
|                                   | 2b      | All items from the World Health Organization Trial Registration Data Set                                                                                                                                                                                                                 | na                       |
| Protocol version                  | 3       | Date and version identifier                                                                                                                                                                                                                                                              | 1                        |
| Funding                           | 4       | Sources and types of financial, material, and other support                                                                                                                                                                                                                              | 20                       |
| Roles and responsibilities        | 5a      | Names, affiliations, and roles of protocol contributors                                                                                                                                                                                                                                  | 1                        |
|                                   | 5b      | Name and contact information for the trial sponsor                                                                                                                                                                                                                                       | na                       |
|                                   | 5c      | Role of study sponsor and funders, if any, in study design; collection, management, analysis, and interpretation of data; writing of the report; and the decision to submit the report for publication, including whether they will have ultimate authority over any of these activities | 20                       |
|                                   | 5d      | Composition, roles, and responsibilities of the coordinating centre, steering committee, endpoint adjudication committee, data management team, and other individuals or groups overseeing the trial, if applicable (see Item 21a for data monitoring committee)                         | 18                       |

1  
2  
3  
4  
5  
6  
7  
8  
9  
10  
11  
12  
13  
14  
15  
16  
17  
18  
19  
20  
21  
22  
23  
24  
25  
26  
27  
28  
29  
30  
31  
32  
33  
34  
35  
36  
37  
38  
39  
40  
41  
42  
43  
44  
45  
46  
47  
48  
49**Introduction**

|                          |    |                                                                                                                                                                                                           |     |
|--------------------------|----|-----------------------------------------------------------------------------------------------------------------------------------------------------------------------------------------------------------|-----|
| Background and rationale | 6a | Description of research question and justification for undertaking the trial, including summary of relevant studies (published and unpublished) examining benefits and harms for each intervention        | 5-7 |
|                          | 6b | Explanation for choice of comparators                                                                                                                                                                     | 5-6 |
| Objectives               | 7  | Specific objectives or hypotheses                                                                                                                                                                         | 7   |
| Trial design             | 8  | Description of trial design including type of trial (eg, parallel group, crossover, factorial, single group), allocation ratio, and framework (eg, superiority, equivalence, noninferiority, exploratory) | 7   |

**Methods: Participants, interventions, and outcomes**

|                      |     |                                                                                                                                                                                                                                                                                                                                                                                |       |
|----------------------|-----|--------------------------------------------------------------------------------------------------------------------------------------------------------------------------------------------------------------------------------------------------------------------------------------------------------------------------------------------------------------------------------|-------|
| Study setting        | 9   | Description of study settings (eg, community clinic, academic hospital) and list of countries where data will be collected. Reference to where list of study sites can be obtained                                                                                                                                                                                             | 7     |
| Eligibility criteria | 10  | Inclusion and exclusion criteria for participants. If applicable, eligibility criteria for study centres and individuals who will perform the interventions (eg, surgeons, psychotherapists)                                                                                                                                                                                   | 8     |
| Interventions        | 11a | Interventions for each group with sufficient detail to allow replication, including how and when they will be administered                                                                                                                                                                                                                                                     | 8-12  |
|                      | 11b | Criteria for discontinuing or modifying allocated interventions for a given trial participant (eg, drug dose change in response to harms, participant request, or improving/worsening disease)                                                                                                                                                                                 | 18    |
|                      | 11c | Strategies to improve adherence to intervention protocols, and any procedures for monitoring adherence (eg, drug tablet return, laboratory tests)                                                                                                                                                                                                                              | 10    |
|                      | 11d | Relevant concomitant care and interventions that are permitted or prohibited during the trial                                                                                                                                                                                                                                                                                  | Na    |
| Outcomes             | 12  | Primary, secondary, and other outcomes, including the specific measurement variable (eg, systolic blood pressure), analysis metric (eg, change from baseline, final value, time to event), method of aggregation (eg, median, proportion), and time point for each outcome. Explanation of the clinical relevance of chosen efficacy and harm outcomes is strongly recommended | 12-14 |
| Participant timeline | 13  | Time schedule of enrolment, interventions (including any run-ins and washouts), assessments, and visits for participants. A schematic diagram is highly recommended (see Figure)                                                                                                                                                                                               | 8     |

|   |             |    |                                                                                                                                                                                       |       |
|---|-------------|----|---------------------------------------------------------------------------------------------------------------------------------------------------------------------------------------|-------|
| 1 |             |    |                                                                                                                                                                                       |       |
| 2 |             |    |                                                                                                                                                                                       |       |
| 3 | Sample size | 14 | Estimated number of participants needed to achieve study objectives and how it was determined, including clinical and statistical assumptions supporting any sample size calculations | 15    |
| 4 |             |    |                                                                                                                                                                                       |       |
| 5 |             |    |                                                                                                                                                                                       |       |
| 6 | Recruitment | 15 | Strategies for achieving adequate participant enrolment to reach target sample size                                                                                                   | 15-16 |
| 7 |             |    |                                                                                                                                                                                       |       |

### 8 **Methods: Assignment of interventions (for controlled trials)**

#### 9 Allocation:

|    |                                  |     |                                                                                                                                                                                                                                                                                                                                                          |       |
|----|----------------------------------|-----|----------------------------------------------------------------------------------------------------------------------------------------------------------------------------------------------------------------------------------------------------------------------------------------------------------------------------------------------------------|-------|
| 10 |                                  |     |                                                                                                                                                                                                                                                                                                                                                          |       |
| 11 |                                  |     |                                                                                                                                                                                                                                                                                                                                                          |       |
| 12 | Sequence generation              | 16a | Method of generating the allocation sequence (eg, computer-generated random numbers), and list of any factors for stratification. To reduce predictability of a random sequence, details of any planned restriction (eg, blocking) should be provided in a separate document that is unavailable to those who enrol participants or assign interventions | 15-16 |
| 13 |                                  |     |                                                                                                                                                                                                                                                                                                                                                          |       |
| 14 |                                  |     |                                                                                                                                                                                                                                                                                                                                                          |       |
| 15 |                                  |     |                                                                                                                                                                                                                                                                                                                                                          |       |
| 16 |                                  |     |                                                                                                                                                                                                                                                                                                                                                          |       |
| 17 |                                  |     |                                                                                                                                                                                                                                                                                                                                                          |       |
| 18 | Allocation concealment mechanism | 16b | Mechanism of implementing the allocation sequence (eg, central telephone; sequentially numbered, opaque, sealed envelopes), describing any steps to conceal the sequence until interventions are assigned                                                                                                                                                | 15-16 |
| 19 |                                  |     |                                                                                                                                                                                                                                                                                                                                                          |       |
| 20 |                                  |     |                                                                                                                                                                                                                                                                                                                                                          |       |
| 21 |                                  |     |                                                                                                                                                                                                                                                                                                                                                          |       |
| 22 | Implementation                   | 16c | Who will generate the allocation sequence, who will enrol participants, and who will assign participants to interventions                                                                                                                                                                                                                                | 15-16 |
| 23 |                                  |     |                                                                                                                                                                                                                                                                                                                                                          |       |
| 24 |                                  |     |                                                                                                                                                                                                                                                                                                                                                          |       |
| 25 | Blinding (masking)               | 17a | Who will be blinded after assignment to interventions (eg, trial participants, care providers, outcome assessors, data analysts), and how                                                                                                                                                                                                                | 14    |
| 26 |                                  |     |                                                                                                                                                                                                                                                                                                                                                          |       |
| 27 |                                  |     |                                                                                                                                                                                                                                                                                                                                                          |       |
| 28 |                                  | 17b | If blinded, circumstances under which unblinding is permissible, and procedure for revealing a participant's allocated intervention during the trial                                                                                                                                                                                                     | Na    |
| 29 |                                  |     |                                                                                                                                                                                                                                                                                                                                                          |       |
| 30 |                                  |     |                                                                                                                                                                                                                                                                                                                                                          |       |
| 31 |                                  |     |                                                                                                                                                                                                                                                                                                                                                          |       |

### 32 **Methods: Data collection, management, and analysis**

|    |                         |     |                                                                                                                                                                                                                                                                                                                                                                                                              |       |
|----|-------------------------|-----|--------------------------------------------------------------------------------------------------------------------------------------------------------------------------------------------------------------------------------------------------------------------------------------------------------------------------------------------------------------------------------------------------------------|-------|
| 33 |                         |     |                                                                                                                                                                                                                                                                                                                                                                                                              |       |
| 34 | Data collection methods | 18a | Plans for assessment and collection of outcome, baseline, and other trial data, including any related processes to promote data quality (eg, duplicate measurements, training of assessors) and a description of study instruments (eg, questionnaires, laboratory tests) along with their reliability and validity, if known. Reference to where data collection forms can be found, if not in the protocol | 12-14 |
| 35 |                         |     |                                                                                                                                                                                                                                                                                                                                                                                                              |       |
| 36 |                         |     |                                                                                                                                                                                                                                                                                                                                                                                                              |       |
| 37 |                         |     |                                                                                                                                                                                                                                                                                                                                                                                                              |       |
| 38 |                         |     |                                                                                                                                                                                                                                                                                                                                                                                                              |       |
| 39 |                         | 18b | Plans to promote participant retention and complete follow-up, including list of any outcome data to be collected for participants who discontinue or deviate from intervention protocols                                                                                                                                                                                                                    | 18    |
| 40 |                         |     |                                                                                                                                                                                                                                                                                                                                                                                                              |       |
| 41 |                         |     |                                                                                                                                                                                                                                                                                                                                                                                                              |       |
| 42 |                         |     |                                                                                                                                                                                                                                                                                                                                                                                                              |       |
| 43 |                         |     |                                                                                                                                                                                                                                                                                                                                                                                                              |       |
| 44 |                         |     |                                                                                                                                                                                                                                                                                                                                                                                                              |       |
| 45 |                         |     |                                                                                                                                                                                                                                                                                                                                                                                                              |       |

|    |                                 |     |                                                                                                                                                                                                                                                                                                                                       |       |
|----|---------------------------------|-----|---------------------------------------------------------------------------------------------------------------------------------------------------------------------------------------------------------------------------------------------------------------------------------------------------------------------------------------|-------|
| 1  |                                 |     |                                                                                                                                                                                                                                                                                                                                       |       |
| 2  |                                 |     |                                                                                                                                                                                                                                                                                                                                       |       |
| 3  | Data management                 | 19  | Plans for data entry, coding, security, and storage, including any related processes to promote data quality (eg, double data entry; range checks for data values). Reference to where details of data management procedures can be found, if not in the protocol                                                                     | 16    |
| 4  |                                 |     |                                                                                                                                                                                                                                                                                                                                       |       |
| 5  |                                 |     |                                                                                                                                                                                                                                                                                                                                       |       |
| 6  |                                 |     |                                                                                                                                                                                                                                                                                                                                       |       |
| 7  | Statistical methods             | 20a | Statistical methods for analysing primary and secondary outcomes. Reference to where other details of the statistical analysis plan can be found, if not in the protocol                                                                                                                                                              | 16    |
| 8  |                                 |     |                                                                                                                                                                                                                                                                                                                                       |       |
| 9  |                                 |     |                                                                                                                                                                                                                                                                                                                                       |       |
| 10 |                                 | 20b | Methods for any additional analyses (eg, subgroup and adjusted analyses)                                                                                                                                                                                                                                                              | 16    |
| 11 |                                 |     |                                                                                                                                                                                                                                                                                                                                       |       |
| 12 |                                 | 20c | Definition of analysis population relating to protocol non-adherence (eg, as randomised analysis), and any statistical methods to handle missing data (eg, multiple imputation)                                                                                                                                                       | 16-17 |
| 13 |                                 |     |                                                                                                                                                                                                                                                                                                                                       |       |
| 14 |                                 |     |                                                                                                                                                                                                                                                                                                                                       |       |
| 15 |                                 |     |                                                                                                                                                                                                                                                                                                                                       |       |
| 16 | <b>Methods: Monitoring</b>      |     |                                                                                                                                                                                                                                                                                                                                       |       |
| 17 |                                 |     |                                                                                                                                                                                                                                                                                                                                       |       |
| 18 | Data monitoring                 | 21a | Composition of data monitoring committee (DMC); summary of its role and reporting structure; statement of whether it is independent from the sponsor and competing interests; and reference to where further details about its charter can be found, if not in the protocol. Alternatively, an explanation of why a DMC is not needed | 18    |
| 19 |                                 |     |                                                                                                                                                                                                                                                                                                                                       |       |
| 20 |                                 |     |                                                                                                                                                                                                                                                                                                                                       |       |
| 21 |                                 |     |                                                                                                                                                                                                                                                                                                                                       |       |
| 22 |                                 |     |                                                                                                                                                                                                                                                                                                                                       |       |
| 23 |                                 | 21b | Description of any interim analyses and stopping guidelines, including who will have access to these interim results and make the final decision to terminate the trial                                                                                                                                                               | Na    |
| 24 |                                 |     |                                                                                                                                                                                                                                                                                                                                       |       |
| 25 |                                 |     |                                                                                                                                                                                                                                                                                                                                       |       |
| 26 | Harms                           | 22  | Plans for collecting, assessing, reporting, and managing solicited and spontaneously reported adverse events and other unintended effects of trial interventions or trial conduct                                                                                                                                                     | 18    |
| 27 |                                 |     |                                                                                                                                                                                                                                                                                                                                       |       |
| 28 |                                 |     |                                                                                                                                                                                                                                                                                                                                       |       |
| 29 | Auditing                        | 23  | Frequency and procedures for auditing trial conduct, if any, and whether the process will be independent from investigators and the sponsor                                                                                                                                                                                           | 18    |
| 30 |                                 |     |                                                                                                                                                                                                                                                                                                                                       |       |
| 31 |                                 |     |                                                                                                                                                                                                                                                                                                                                       |       |
| 32 |                                 |     |                                                                                                                                                                                                                                                                                                                                       |       |
| 33 | <b>Ethics and dissemination</b> |     |                                                                                                                                                                                                                                                                                                                                       |       |
| 34 |                                 |     |                                                                                                                                                                                                                                                                                                                                       |       |
| 35 | Research ethics approval        | 24  | Plans for seeking research ethics committee/institutional review board (REC/IRB) approval                                                                                                                                                                                                                                             | 17    |
| 36 |                                 |     |                                                                                                                                                                                                                                                                                                                                       |       |
| 37 |                                 |     |                                                                                                                                                                                                                                                                                                                                       |       |
| 38 | Protocol amendments             | 25  | Plans for communicating important protocol modifications (eg, changes to eligibility criteria, outcomes, analyses) to relevant parties (eg, investigators, REC/IRBs, trial participants, trial registries, journals, regulators)                                                                                                      | 18    |
| 39 |                                 |     |                                                                                                                                                                                                                                                                                                                                       |       |
| 40 |                                 |     |                                                                                                                                                                                                                                                                                                                                       |       |
| 41 |                                 |     |                                                                                                                                                                                                                                                                                                                                       |       |
| 42 |                                 |     |                                                                                                                                                                                                                                                                                                                                       |       |
| 43 |                                 |     |                                                                                                                                                                                                                                                                                                                                       |       |
| 44 |                                 |     |                                                                                                                                                                                                                                                                                                                                       |       |
| 45 |                                 |     |                                                                                                                                                                                                                                                                                                                                       |       |
| 46 |                                 |     |                                                                                                                                                                                                                                                                                                                                       |       |
| 47 |                                 |     |                                                                                                                                                                                                                                                                                                                                       |       |
| 48 |                                 |     |                                                                                                                                                                                                                                                                                                                                       |       |
| 49 |                                 |     |                                                                                                                                                                                                                                                                                                                                       |       |

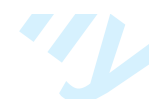

|    |                               |     |                                                                                                                                                                                                                                                                                     |    |
|----|-------------------------------|-----|-------------------------------------------------------------------------------------------------------------------------------------------------------------------------------------------------------------------------------------------------------------------------------------|----|
| 1  |                               |     |                                                                                                                                                                                                                                                                                     |    |
| 2  |                               |     |                                                                                                                                                                                                                                                                                     |    |
| 3  | Consent or assent             | 26a | Who will obtain informed consent or assent from potential trial participants or authorised surrogates, and how (see Item 32)                                                                                                                                                        | 16 |
| 4  |                               |     |                                                                                                                                                                                                                                                                                     |    |
| 5  |                               |     |                                                                                                                                                                                                                                                                                     |    |
| 6  |                               | 26b | Additional consent provisions for collection and use of participant data and biological specimens in ancillary studies, if applicable                                                                                                                                               | Na |
| 7  |                               |     |                                                                                                                                                                                                                                                                                     |    |
| 8  |                               |     |                                                                                                                                                                                                                                                                                     |    |
| 9  | Confidentiality               | 27  | How personal information about potential and enrolled participants will be collected, shared, and maintained in order to protect confidentiality before, during, and after the trial                                                                                                | 15 |
| 10 |                               |     |                                                                                                                                                                                                                                                                                     |    |
| 11 |                               |     |                                                                                                                                                                                                                                                                                     |    |
| 12 | Declaration of interests      | 28  | Financial and other competing interests for principal investigators for the overall trial and each study site                                                                                                                                                                       | 20 |
| 13 |                               |     |                                                                                                                                                                                                                                                                                     |    |
| 14 |                               |     |                                                                                                                                                                                                                                                                                     |    |
| 15 | Access to data                | 29  | Statement of who will have access to the final trial dataset, and disclosure of contractual agreements that limit such access for investigators                                                                                                                                     | 19 |
| 16 |                               |     |                                                                                                                                                                                                                                                                                     |    |
| 17 |                               |     |                                                                                                                                                                                                                                                                                     |    |
| 18 | Ancillary and post-trial care | 30  | Provisions, if any, for ancillary and post-trial care, and for compensation to those who suffer harm from trial participation                                                                                                                                                       | Na |
| 19 |                               |     |                                                                                                                                                                                                                                                                                     |    |
| 20 |                               |     |                                                                                                                                                                                                                                                                                     |    |
| 21 | Dissemination policy          | 31a | Plans for investigators and sponsor to communicate trial results to participants, healthcare professionals, the public, and other relevant groups (eg, via publication, reporting in results databases, or other data sharing arrangements), including any publication restrictions | 19 |
| 22 |                               |     |                                                                                                                                                                                                                                                                                     |    |
| 23 |                               |     |                                                                                                                                                                                                                                                                                     |    |
| 24 |                               |     |                                                                                                                                                                                                                                                                                     |    |
| 25 |                               |     |                                                                                                                                                                                                                                                                                     |    |
| 26 |                               | 31b | Authorship eligibility guidelines and any intended use of professional writers                                                                                                                                                                                                      | 19 |
| 27 |                               |     |                                                                                                                                                                                                                                                                                     |    |
| 28 |                               | 31c | Plans, if any, for granting public access to the full protocol, participant-level dataset, and statistical code                                                                                                                                                                     | Na |
| 29 |                               |     |                                                                                                                                                                                                                                                                                     |    |
| 30 | <b>Appendices</b>             |     |                                                                                                                                                                                                                                                                                     |    |
| 31 |                               |     |                                                                                                                                                                                                                                                                                     |    |
| 32 | Informed consent materials    | 32  | Model consent form and other related documentation given to participants and authorised surrogates                                                                                                                                                                                  | Na |
| 33 |                               |     |                                                                                                                                                                                                                                                                                     |    |
| 34 |                               |     |                                                                                                                                                                                                                                                                                     |    |
| 35 | Biological specimens          | 33  | Plans for collection, laboratory evaluation, and storage of biological specimens for genetic or molecular analysis in the current trial and for future use in ancillary studies, if applicable                                                                                      | Na |
| 36 |                               |     |                                                                                                                                                                                                                                                                                     |    |
| 37 |                               |     |                                                                                                                                                                                                                                                                                     |    |
| 38 |                               |     |                                                                                                                                                                                                                                                                                     |    |
| 39 |                               |     |                                                                                                                                                                                                                                                                                     |    |
| 40 |                               |     |                                                                                                                                                                                                                                                                                     |    |
| 41 |                               |     |                                                                                                                                                                                                                                                                                     |    |
| 42 |                               |     |                                                                                                                                                                                                                                                                                     |    |
| 43 |                               |     |                                                                                                                                                                                                                                                                                     |    |
| 44 |                               |     |                                                                                                                                                                                                                                                                                     |    |
| 45 |                               |     |                                                                                                                                                                                                                                                                                     |    |
| 46 |                               |     |                                                                                                                                                                                                                                                                                     |    |
| 47 |                               |     |                                                                                                                                                                                                                                                                                     |    |
| 48 |                               |     |                                                                                                                                                                                                                                                                                     |    |
| 49 |                               |     |                                                                                                                                                                                                                                                                                     |    |



1  
2  
3  
4  
5  
6  
7  
8  
9  
10  
11  
12  
13  
14  
15  
16  
17  
18  
19  
20  
21  
22  
23  
24  
25  
26  
27  
28  
29  
30  
31  
32  
33  
34  
35  
36  
37  
38  
39  
40  
41  
42  
43  
44  
45  
46  
47  
48  
49

\*It is strongly recommended that this checklist be read in conjunction with the SPIRIT 2013 Explanation & Elaboration for important clarification on the items. Amendments to the protocol should be tracked and dated. The SPIRIT checklist is copyrighted by the SPIRIT Group under the Creative Commons "[Attribution-NonCommercial-NoDerivs 3.0 Unported](#)" license.

For peer review only

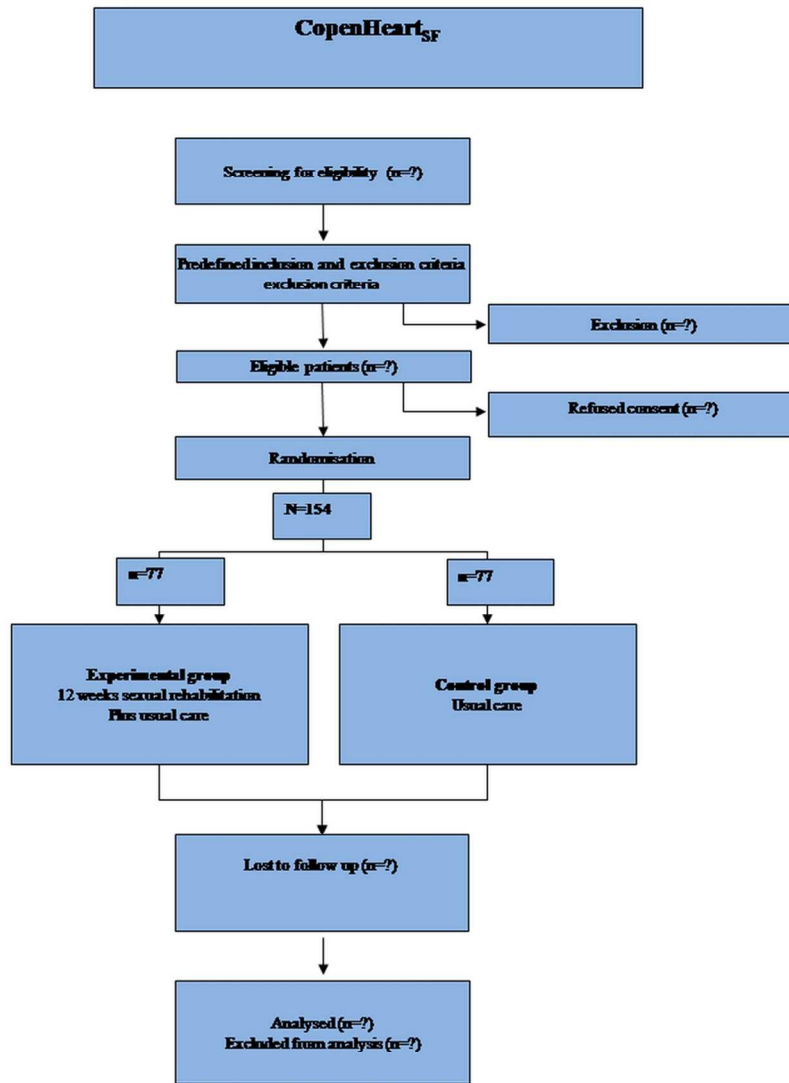

Figure 1. Flowchart

Flowchart  
90x119mm (300 x 300 DPI)
